# Supplementary material for: Synthesis and Antibacterial Evaluation of N-phenylacetamide Derivatives Containing 4-Arylthiazole Moieties
Source: PubMed Central journal article supplement (PMC7221908; doi:10.3390/molecules25081772), 2020-04-12
Supplement: molecules-25-01772-s001.pdf [file molecules-25-01772-s001.pdf]

*Supporting information*

# Synthesis and Antibacterial Evaluation of *N*-Phenylacetamide Derivatives Containing 4-Arylthiazole Moiety

Hui Lu, Xia Zhou\*, Lei Wang, Linhong Jin\*

State Key Laboratory Breeding Base of Green Pesticide and Agricultural Bioengineering, Key Laboratory of Green Pesticide and Agricultural Bioengineering, Ministry of Education, Guizhou University, Huaxi District, Guiyang 550025, China. [luhui2624904231@163.com](mailto:luhui2624904231@163.com) (H.L.); [wanglei880328@163.com](mailto:wanglei880328@163.com) (L.W.);

\* Correspondence: E-mail: [linhong\\_j@126.com](mailto:linhong_j@126.com), [zhouxia\\_j@126.com](mailto:zhouxia_j@126.com); Tel.: +86-851-3620-521 (X.Z. & L.J.);

Fax: +868513622211 (X.Z. & L.J.)

$^1\text{H}$  and  $^{13}\text{C}$  NMR spectra of target compound 5-I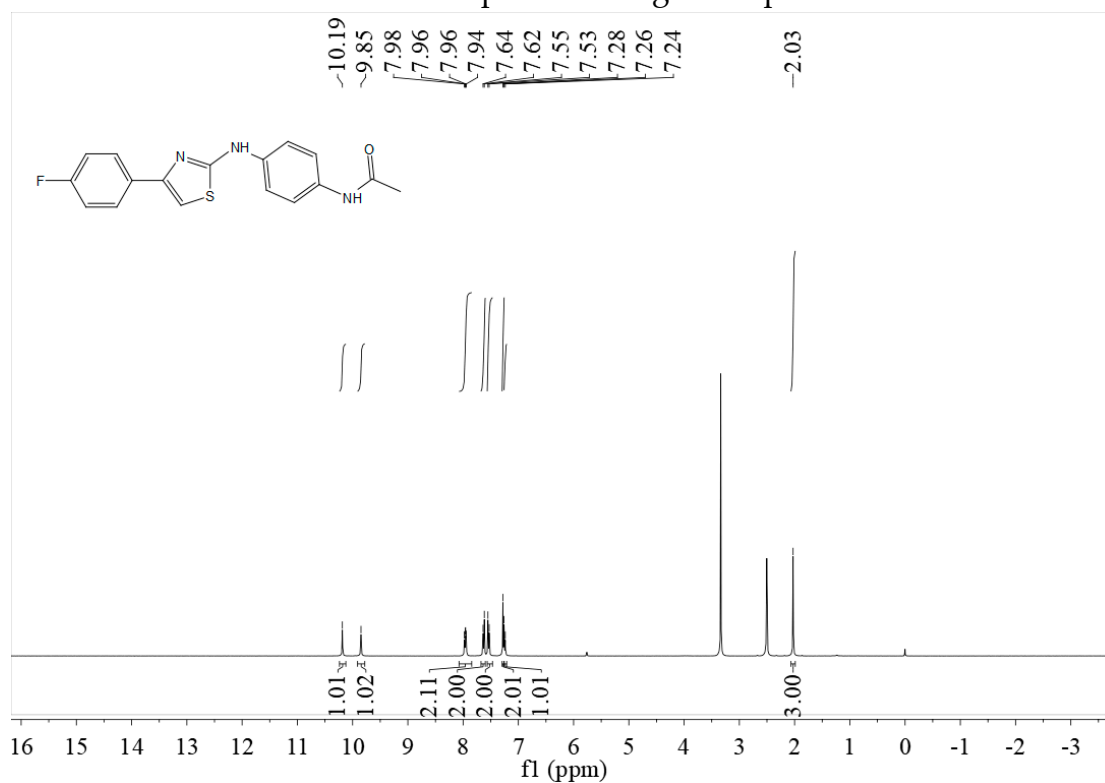 $^{13}\text{C}$  NMR spectrum of compound A<sub>1</sub>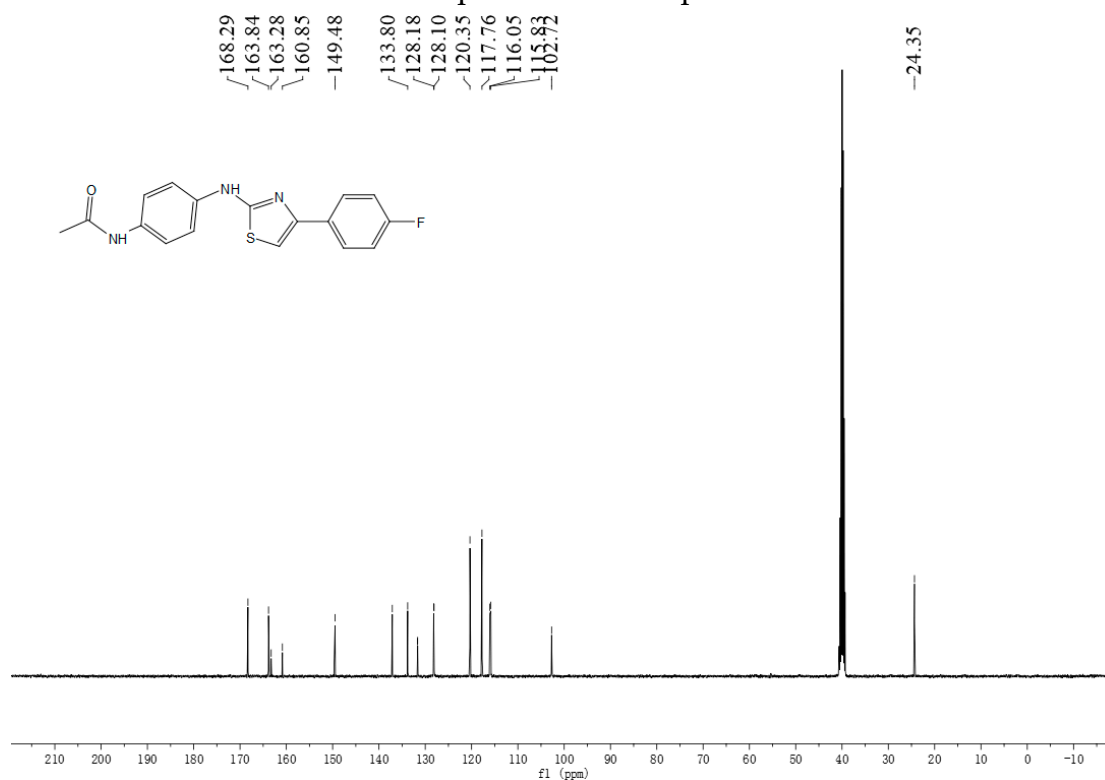 $^{13}\text{C}$  NMR spectrum of compound A<sub>1</sub>

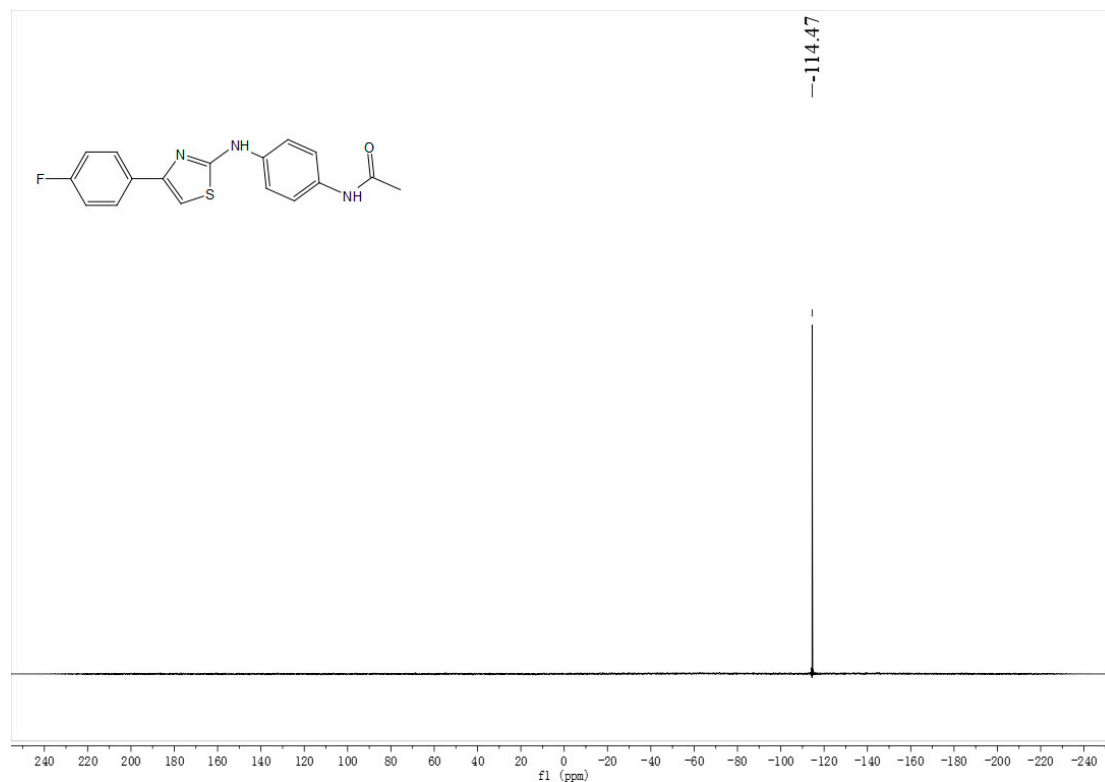 $^{19}\text{F}$  NMR spectrum of compound A<sub>1</sub>

201905072 #69 F1: 0.67 AV: 1 NL: 193E7  
T: FIMS+pESI Full ms[100.0000-1000.0000]

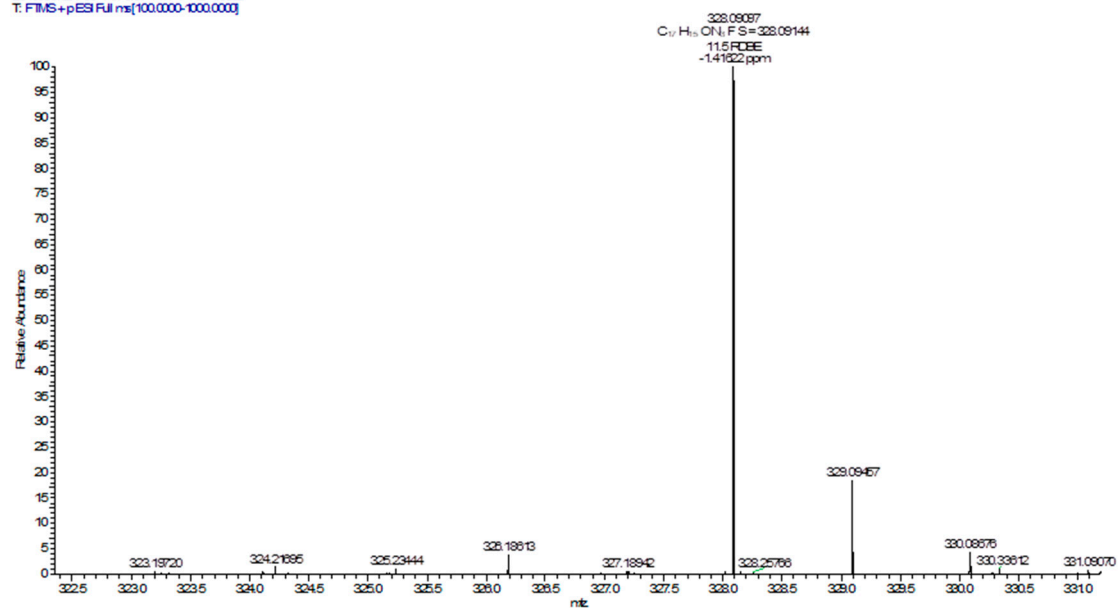HRMS(ESI) of compound A<sub>1</sub>

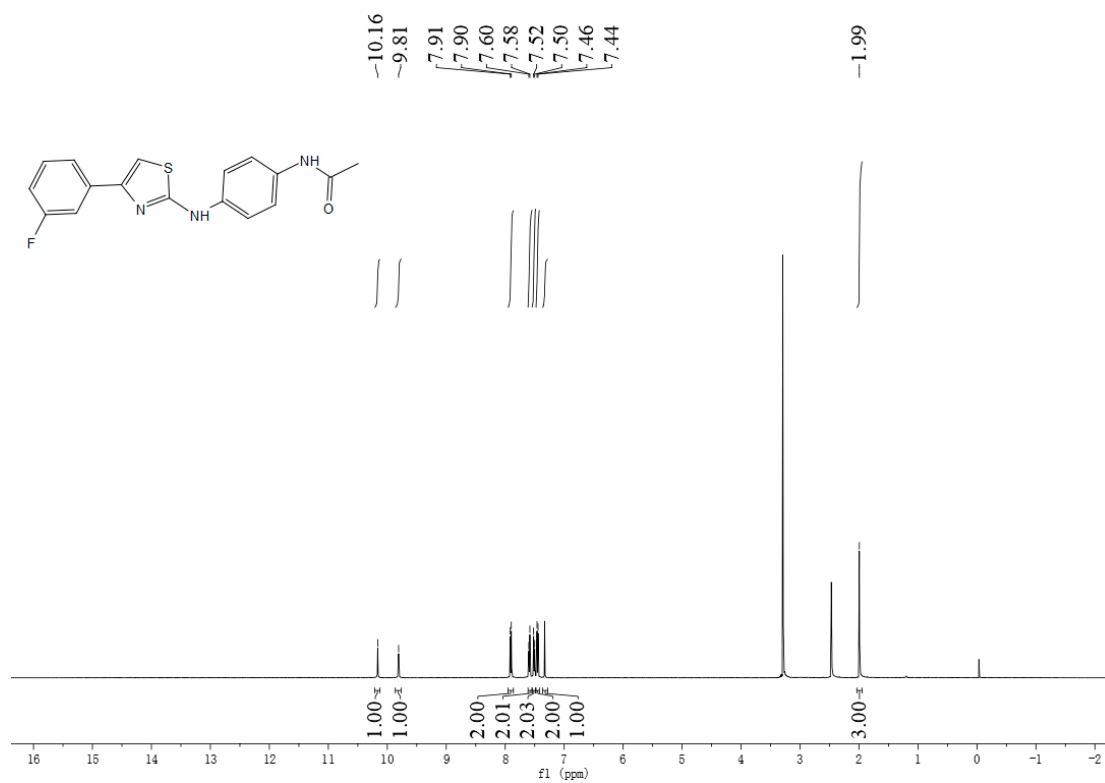**<sup>1</sup>H NMR spectrum of compound A<sub>2</sub>**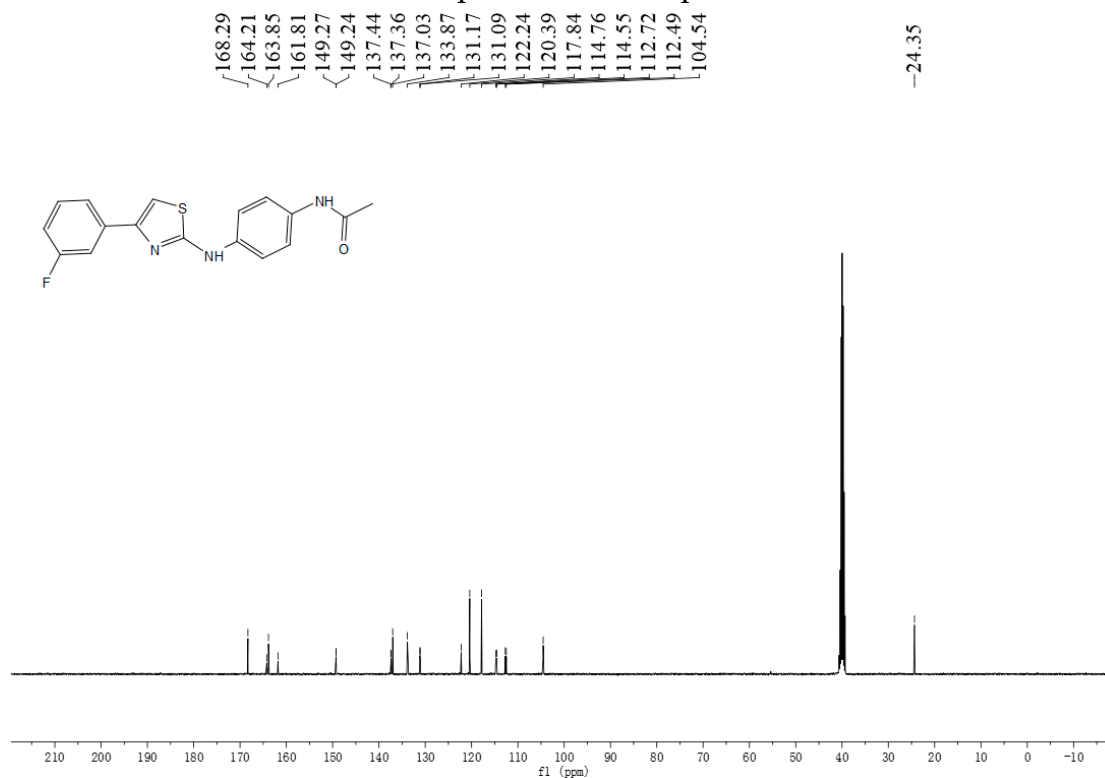**<sup>13</sup>C NMR spectrum of compound A<sub>2</sub>**

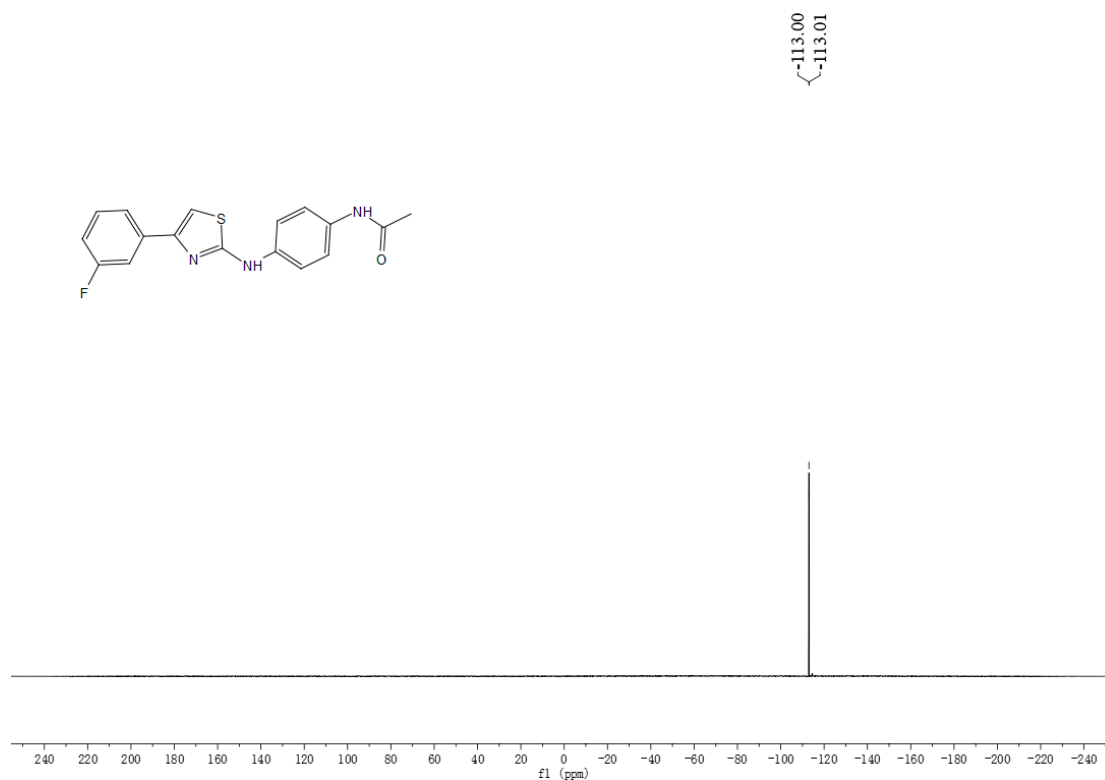 $^{19}\text{F}$  NMR spectrum of compound A2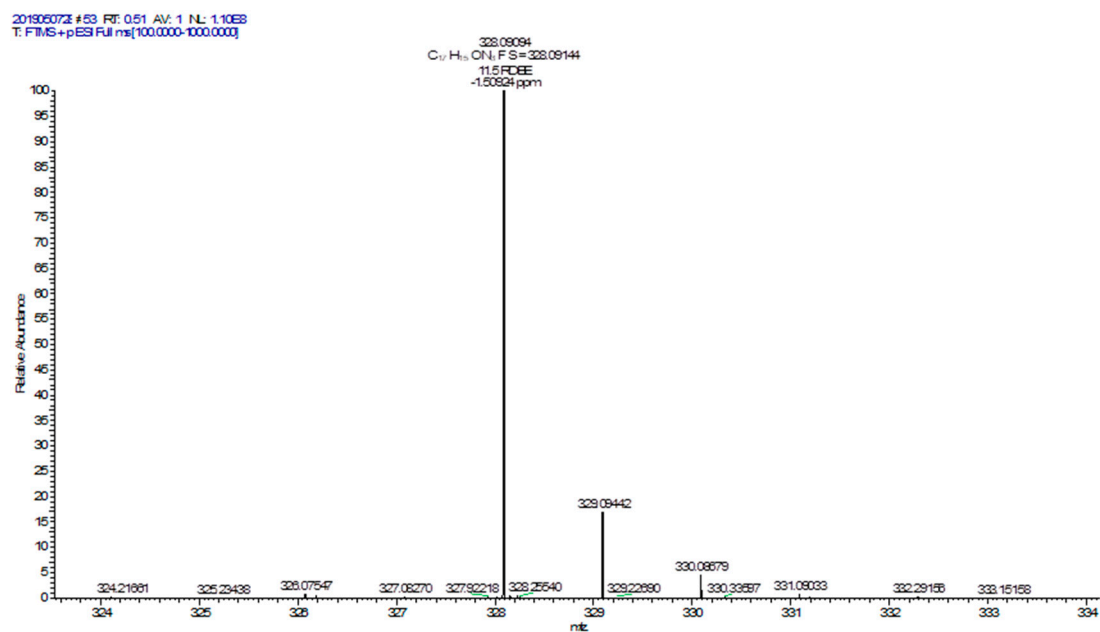

HRMS(ESI) of compound A2

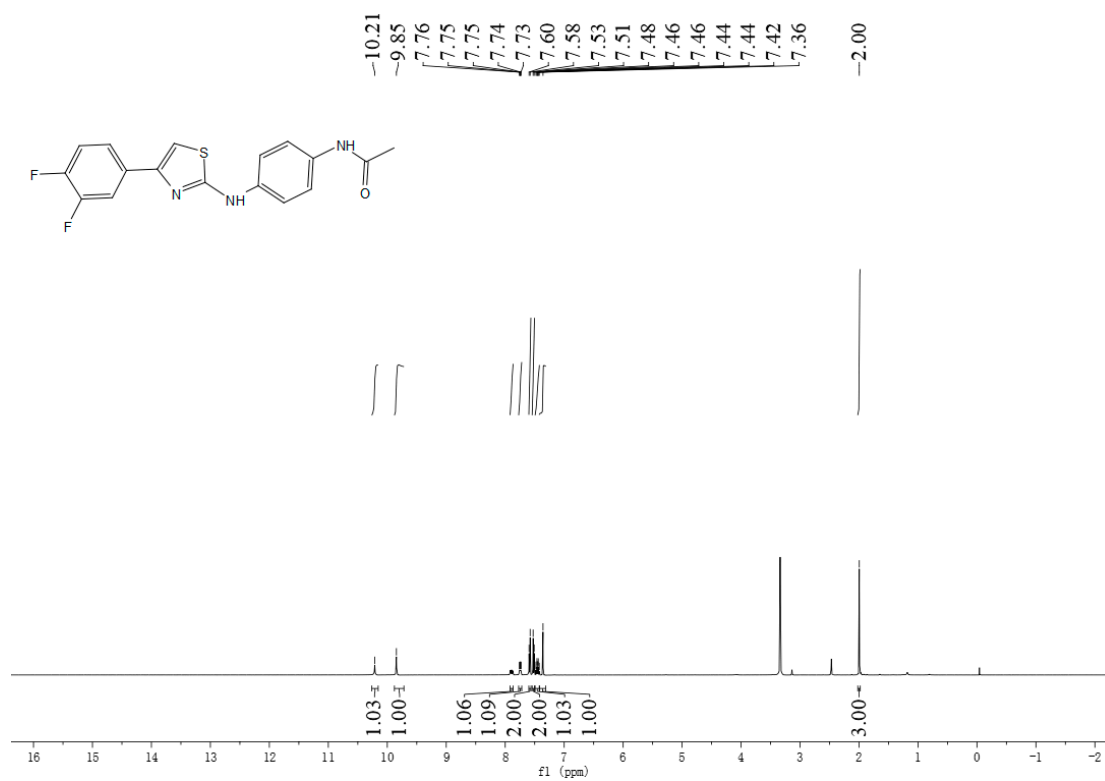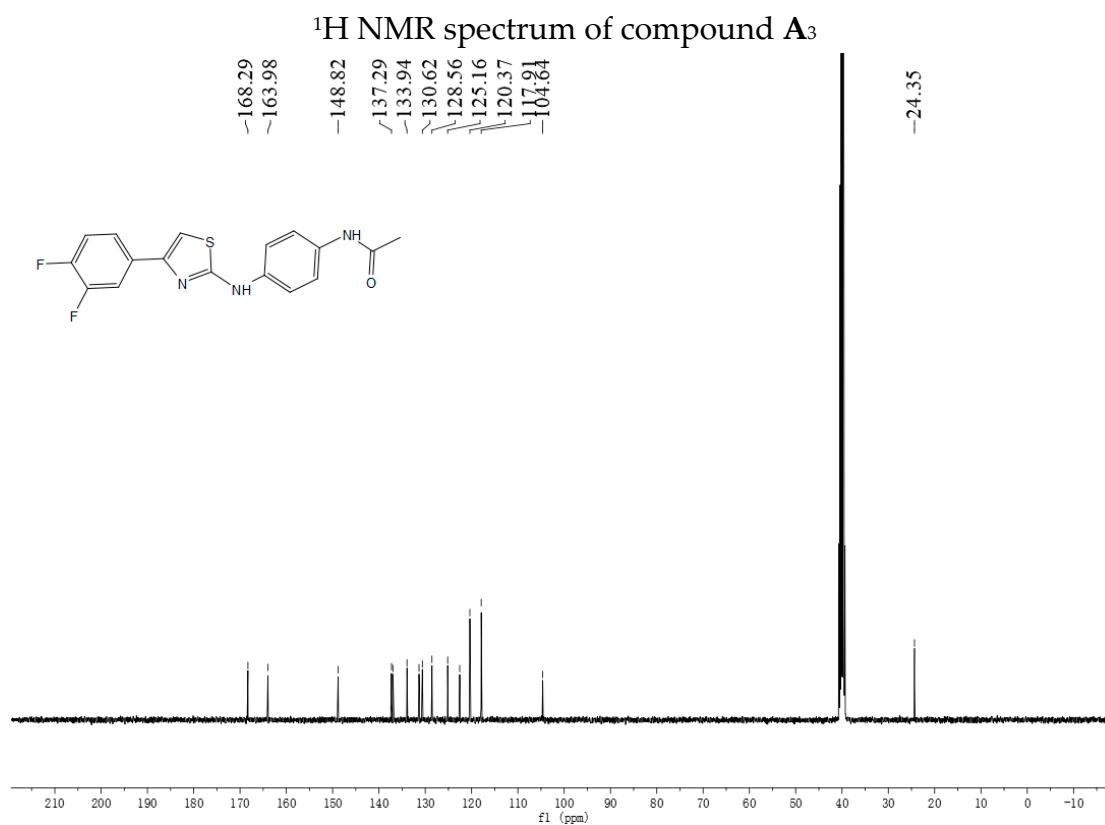

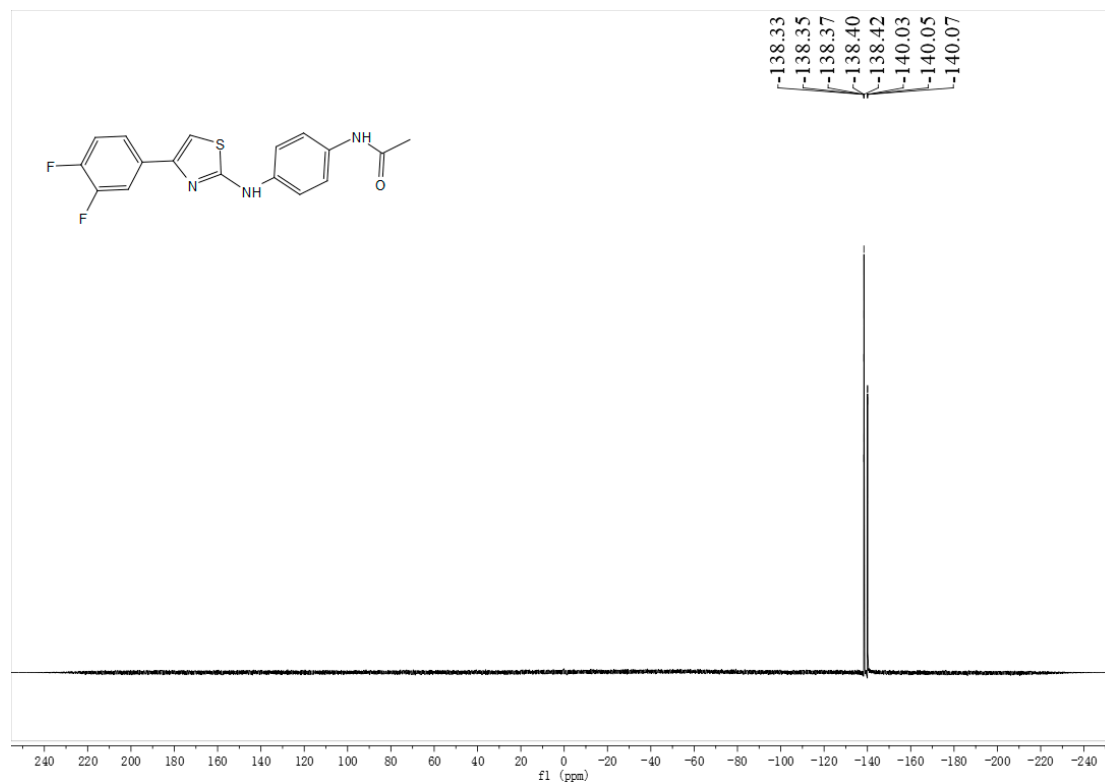 $^{19}\text{F}$  NMR spectrum of compound A<sub>3</sub>

2019060731 #81 RT: 0.79 AV: 1 NL: 4.68E6  
T: FTMS+pESI Fullms[100.0000-1000.0000]

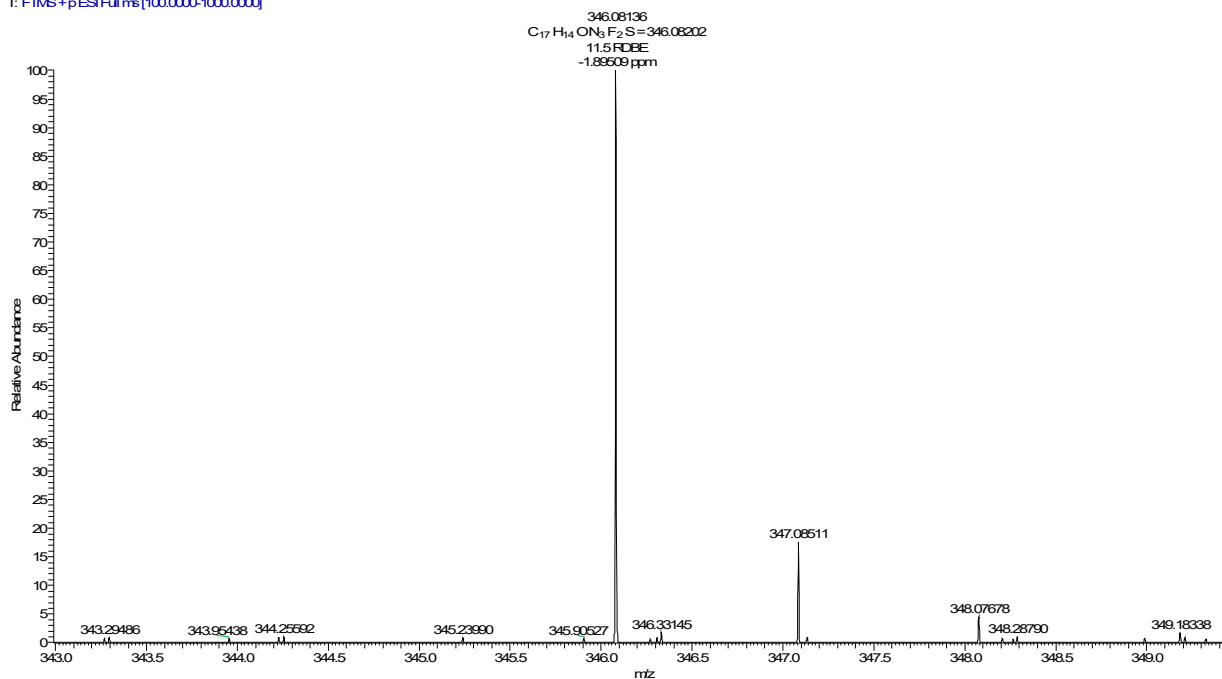HRMS(ESI) of compound A<sub>3</sub>

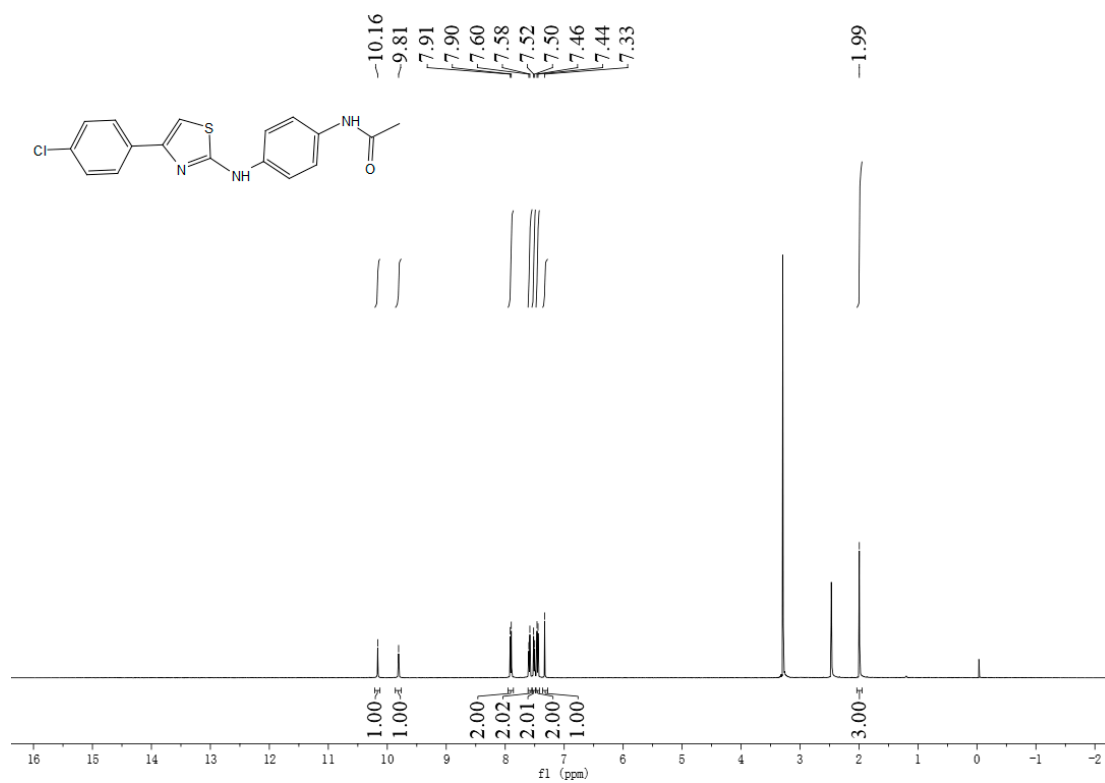

<sup>1</sup>H NMR spectrum of compound A<sub>4</sub>

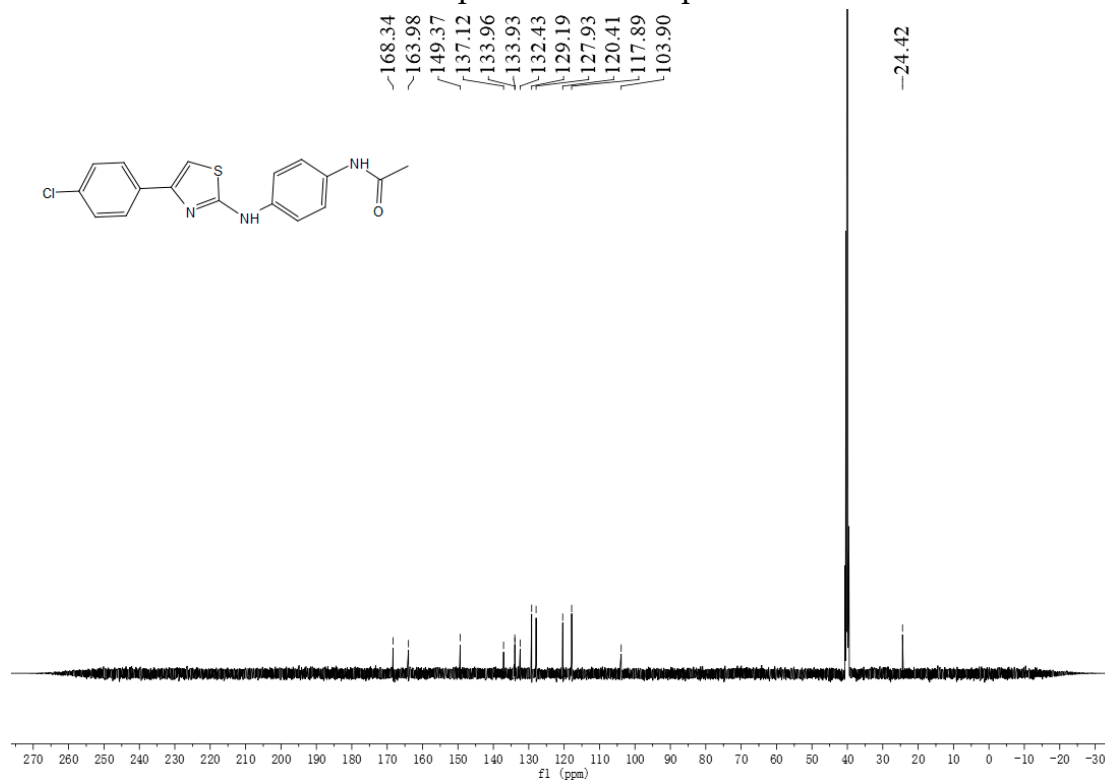

<sup>13</sup>C NMR spectrum of compound A<sub>4</sub>



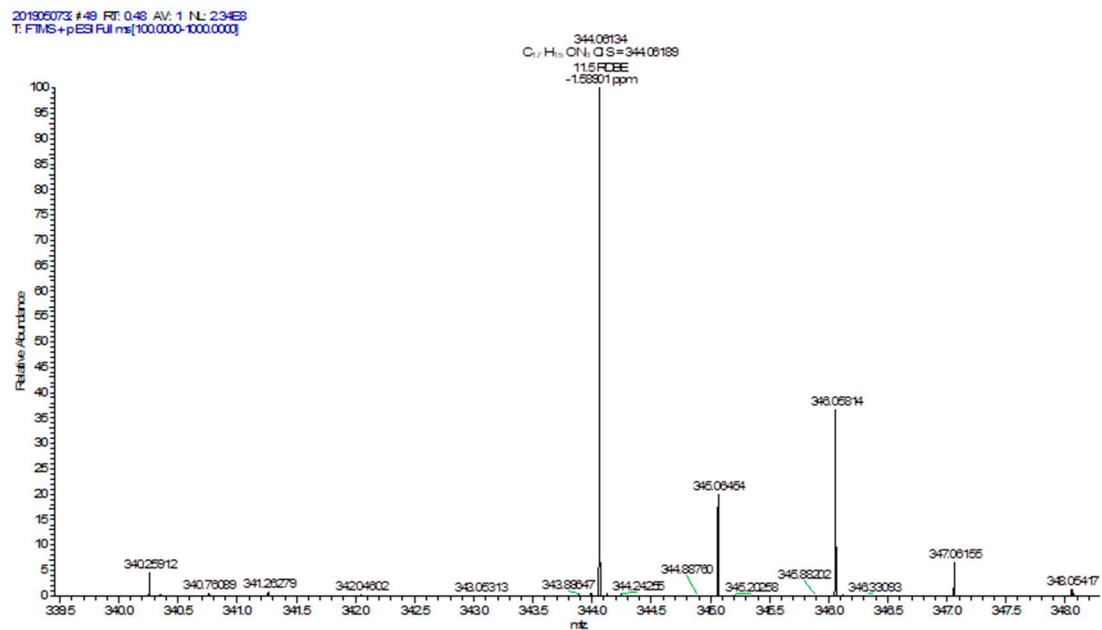HRMS(ESI) of compound A<sub>4</sub>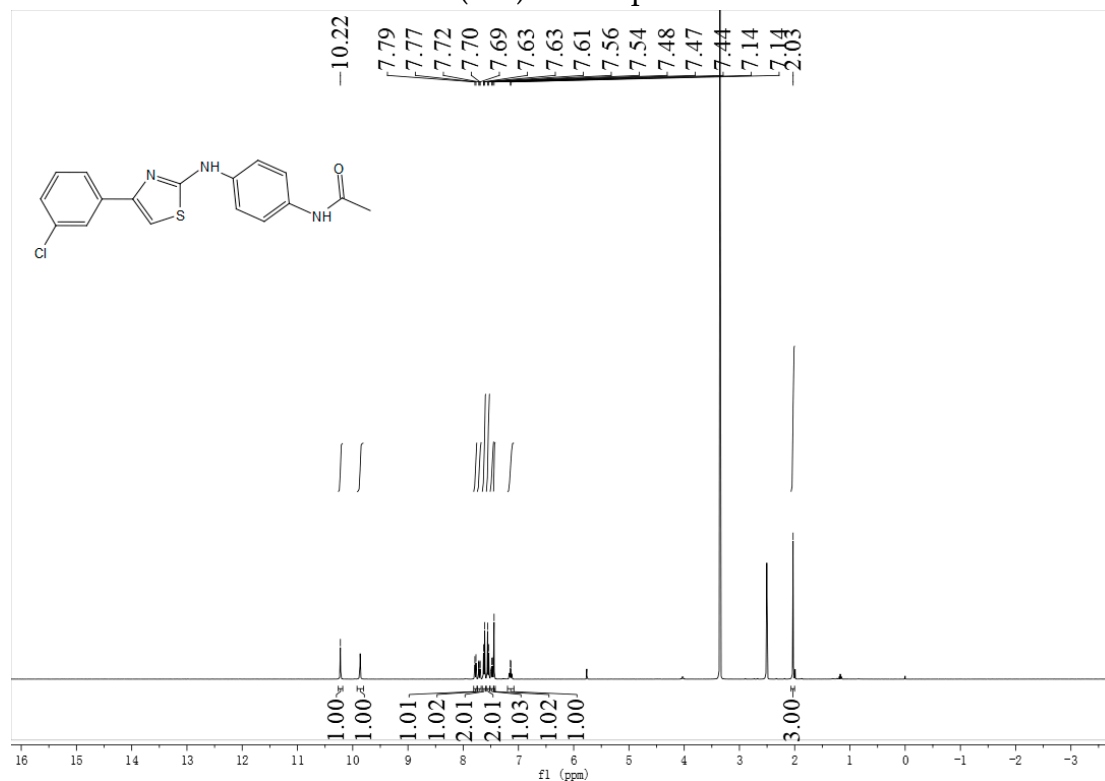<sup>1</sup>H NMR spectrum of compound A<sub>5</sub>

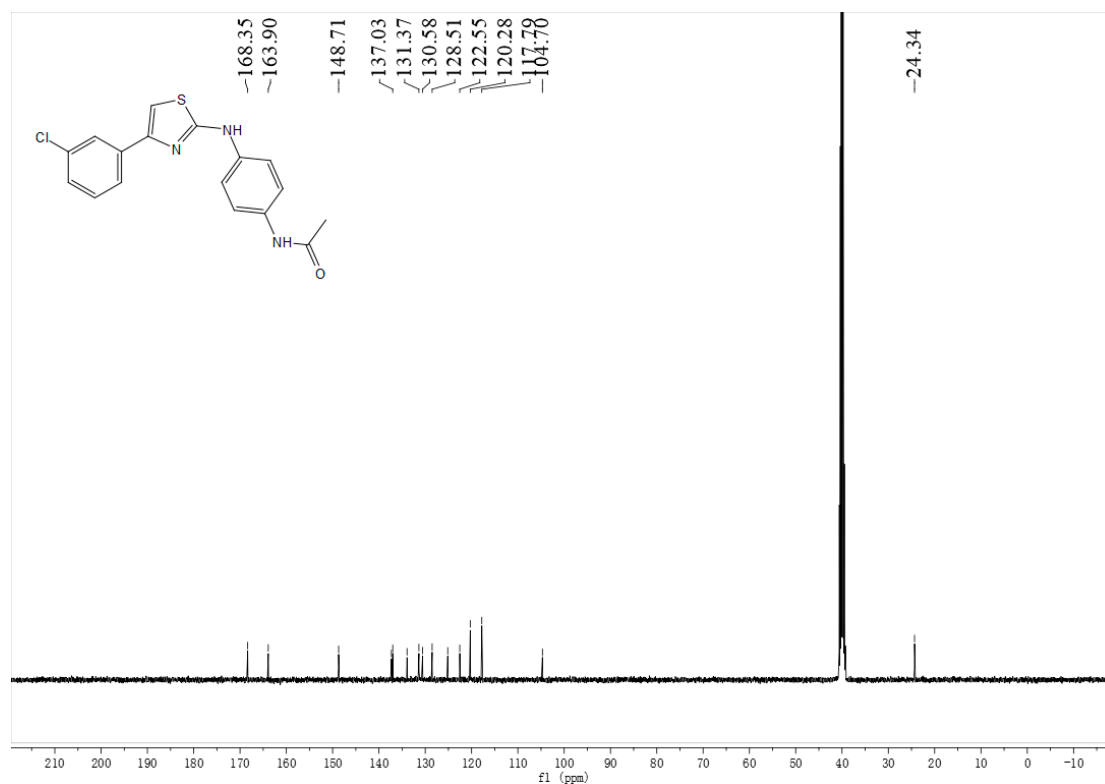

<sup>13</sup>C NMR spectrum of compound A<sub>5</sub>

2019102543 #49 F1: 0.47 AV: 1 NL: 1.28E9  
T: FTMS+pESI Full ms [100.0000-1000.0000]

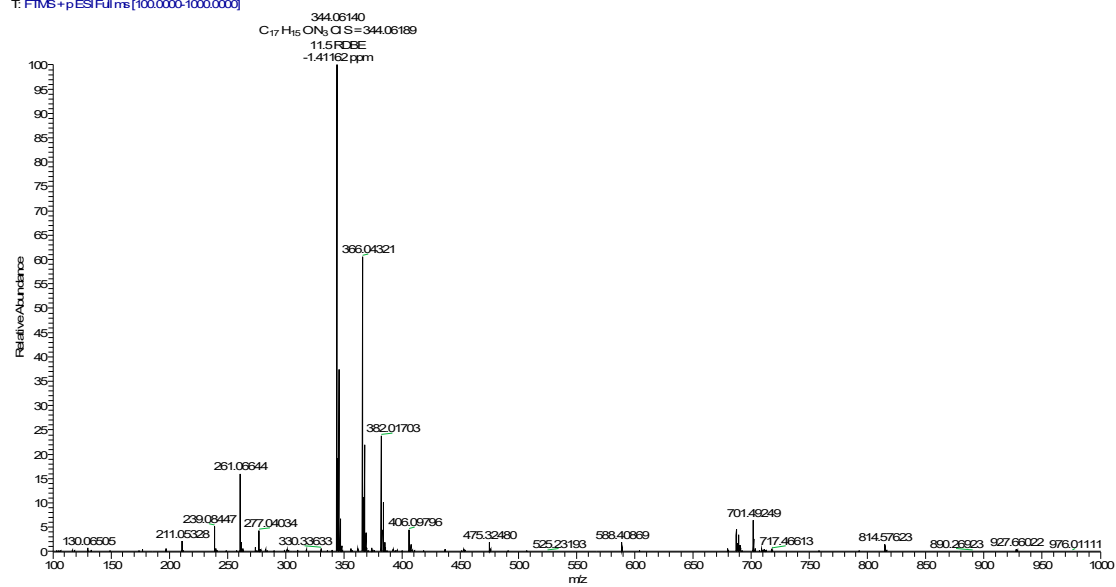

HRMS(ESI) of compound A<sub>5</sub>

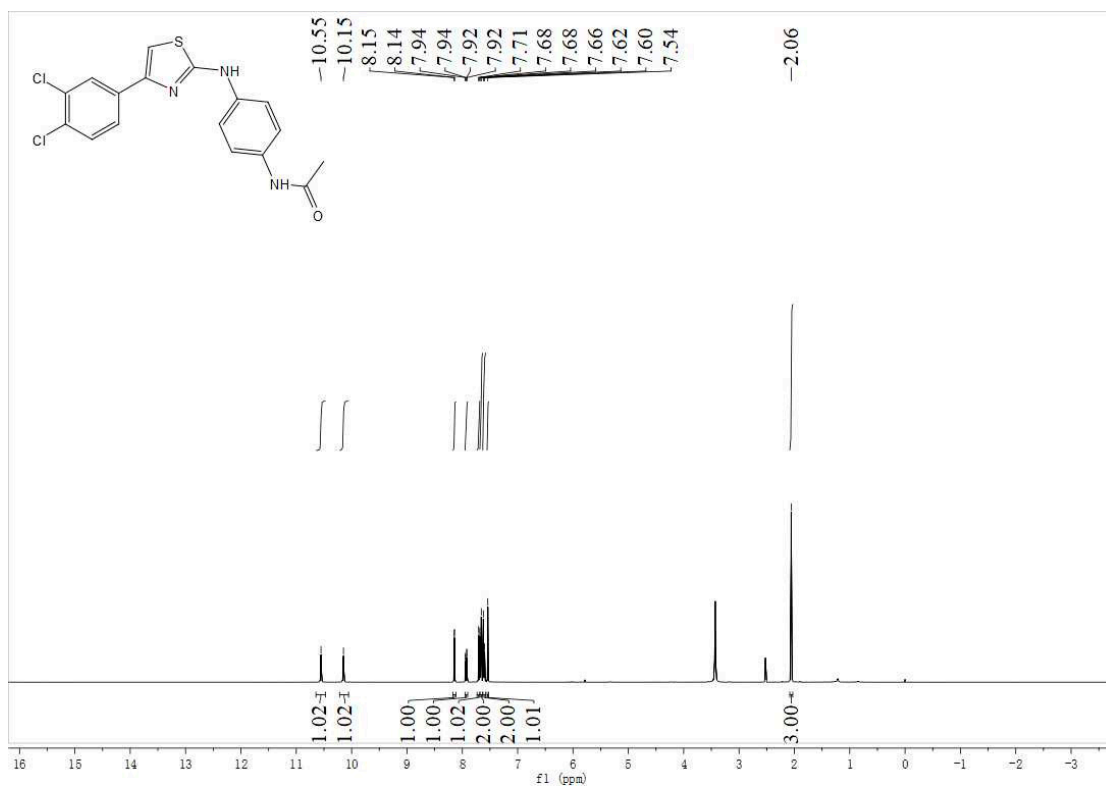

<sup>1</sup>H NMR spectrum of compound A<sub>6</sub>

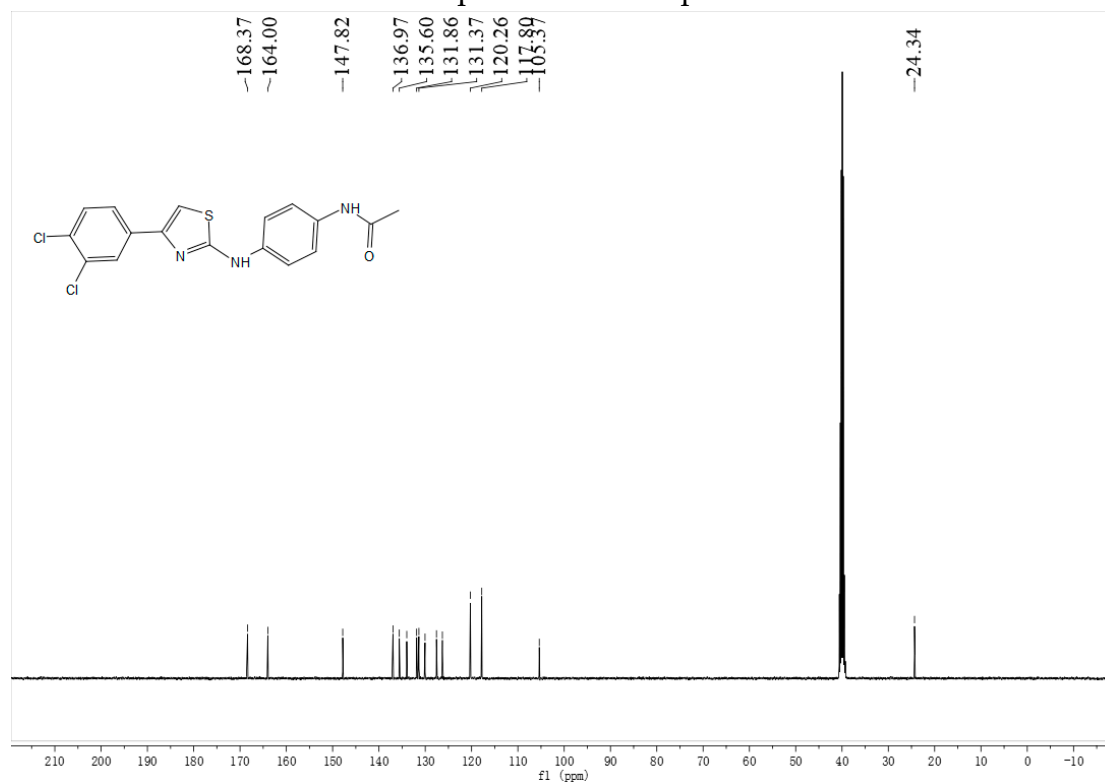

<sup>13</sup>C NMR spectrum of compound A<sub>6</sub>

2019102544 #49 RT: 0.48 AV: 1 NL: 2.03EB  
T: FTMS+pESI Full ms [100.0000-1000.0000]

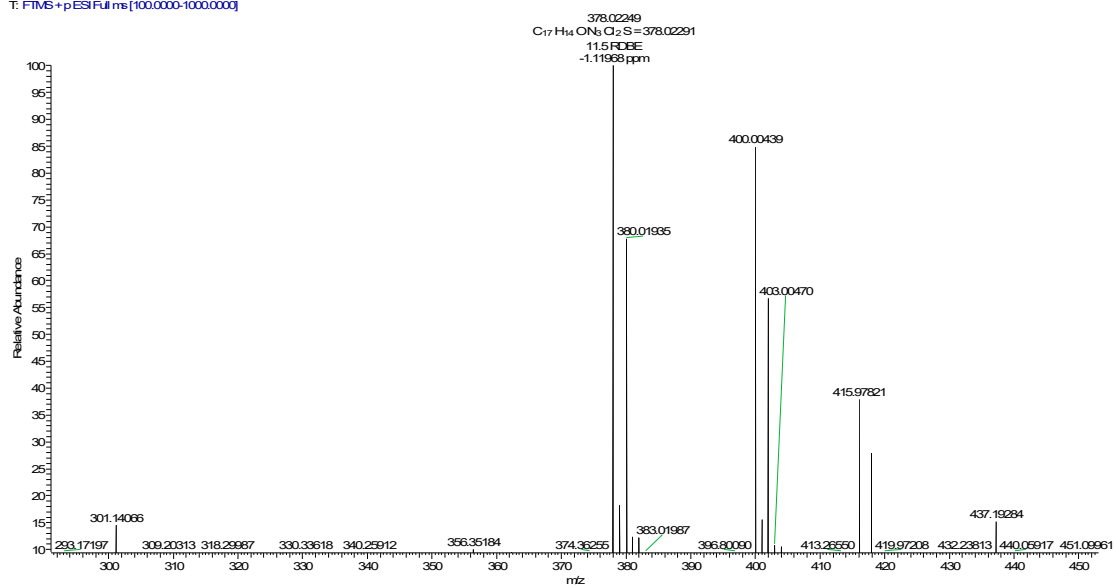

HRMS(ESI) of compound A<sub>6</sub>

-10.19  
-9.83  
7.85  
7.84  
7.83  
7.83  
7.61  
7.59  
7.58  
7.57  
7.53  
7.51  
7.33  
-2.00

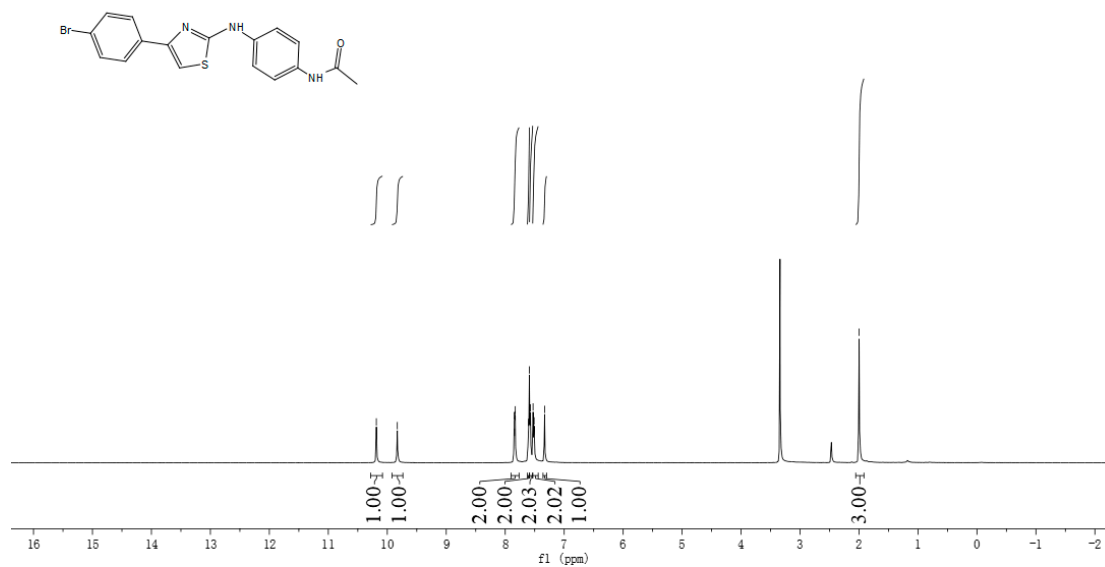

<sup>1</sup>H NMR spectrum of compound A<sub>7</sub>

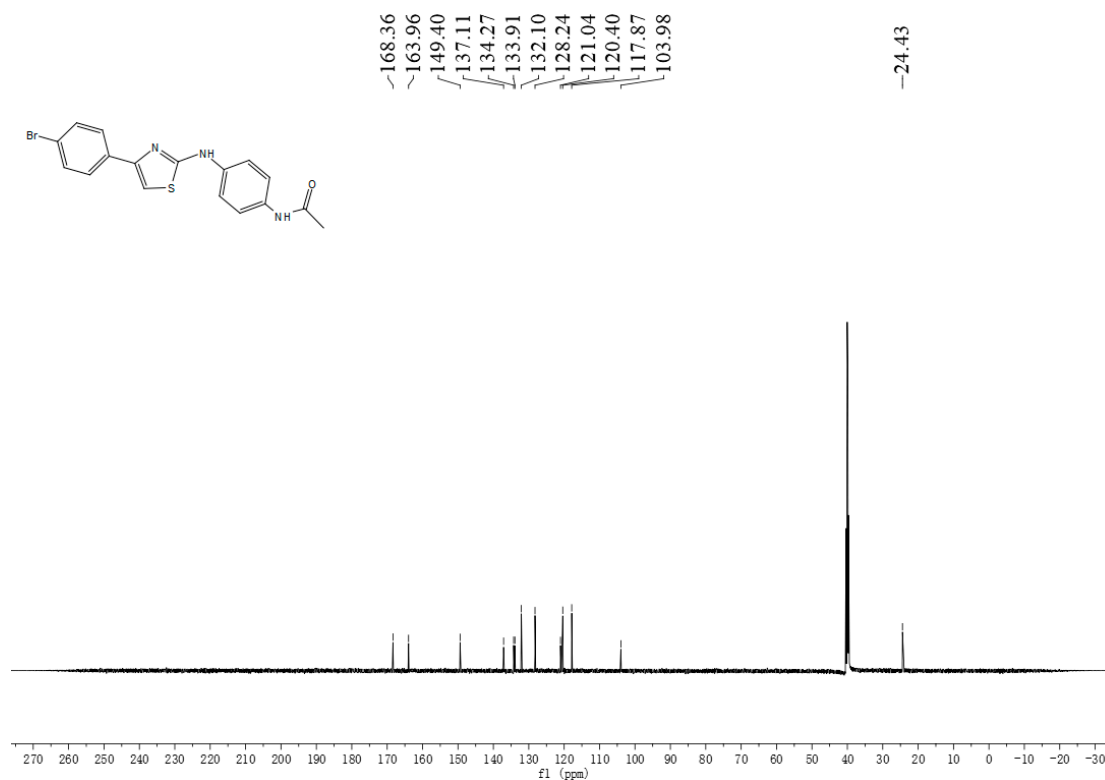<sup>13</sup>C NMR spectrum of compound A<sub>7</sub>

2019102545 #51 F1: 0.50 AV: 1 NL: 3.35E7  
T: FTMS+pESI Full.ms [100.0000-1000.0000]

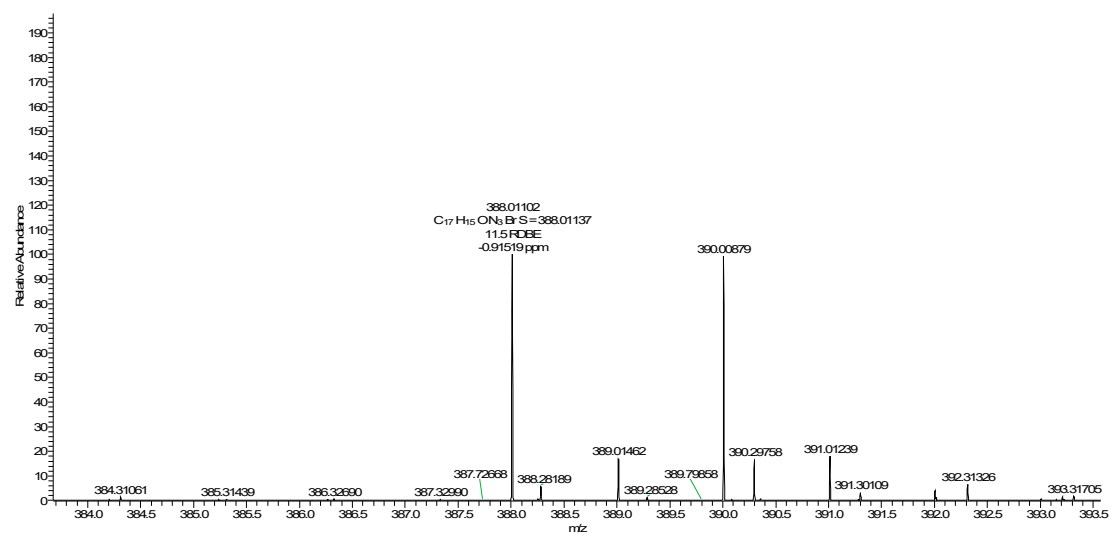HRMS(ESI) of compound A<sub>7</sub>

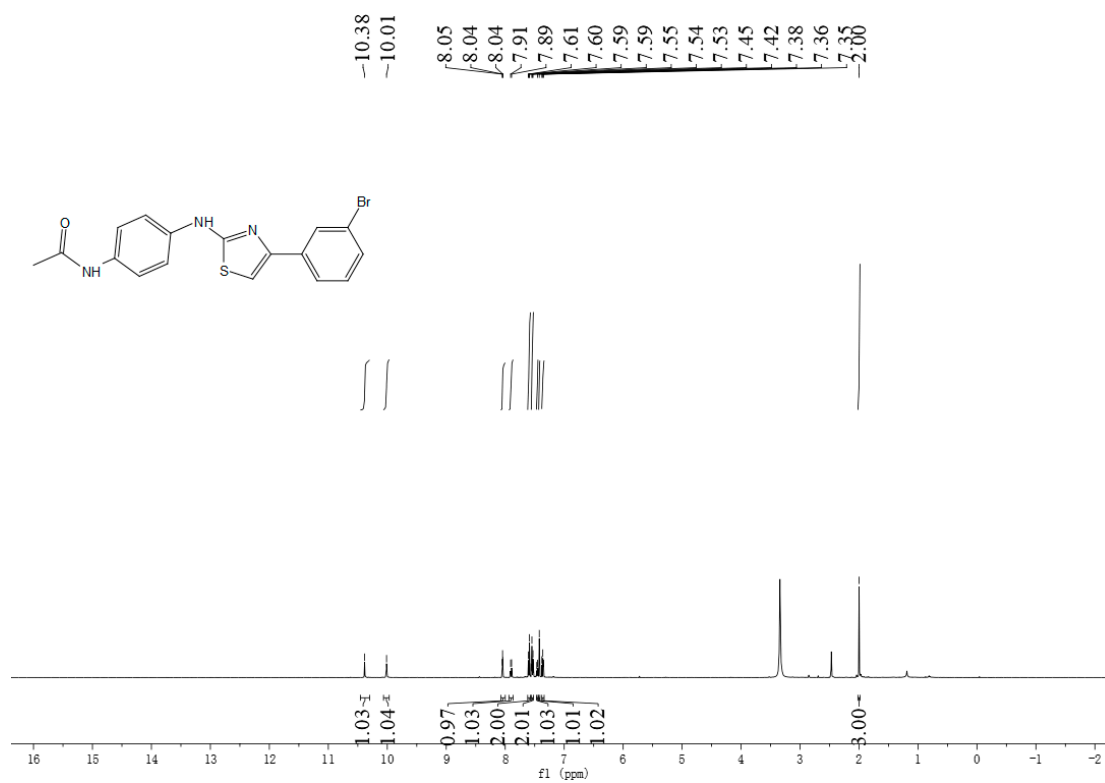<sup>1</sup>H NMR spectrum of compound A8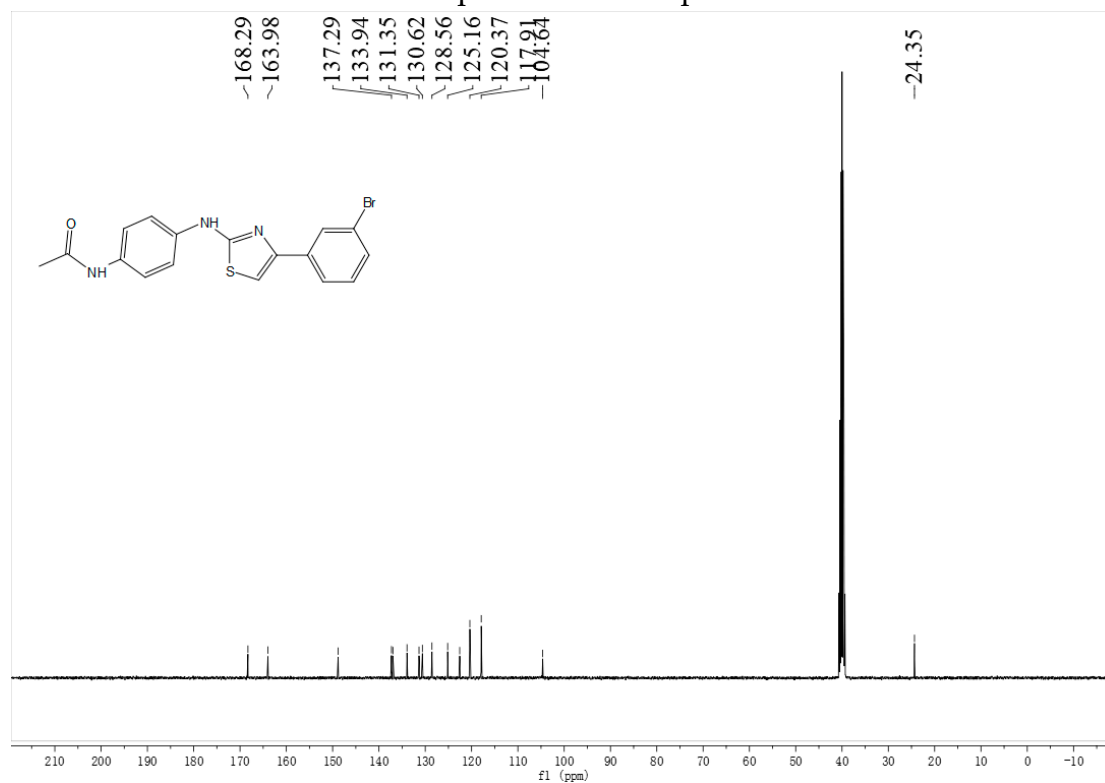<sup>13</sup>C NMR spectrum of compound A8

2019102545#51 RT: 0.50 AV: 1 NL: 3.33E7  
T: FTMS+pESI Full ms [100.0000-1000.0000]

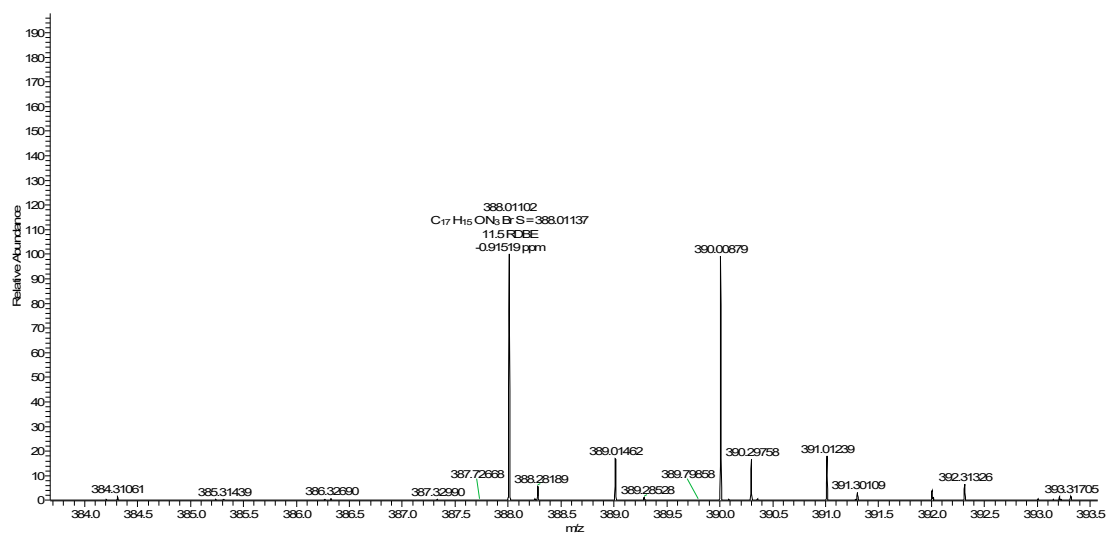

HRMS(ESI) of compound A<sub>8</sub>

10.29  
9.89  
8.15  
8.13  
7.80  
7.78  
7.65  
7.59  
7.58  
7.56  
-2.04

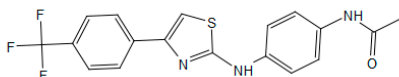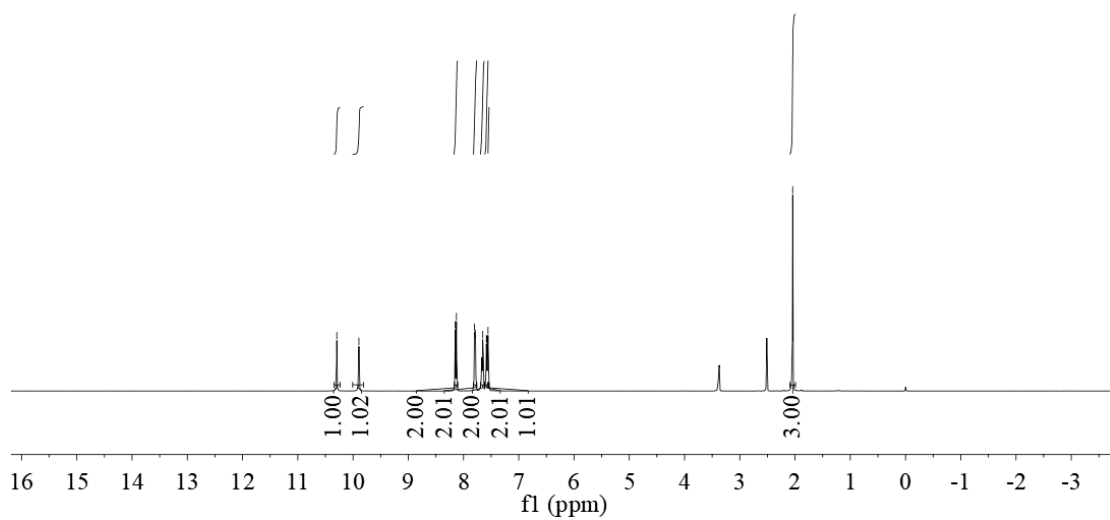

<sup>1</sup>H NMR spectrum of compound A<sub>9</sub>

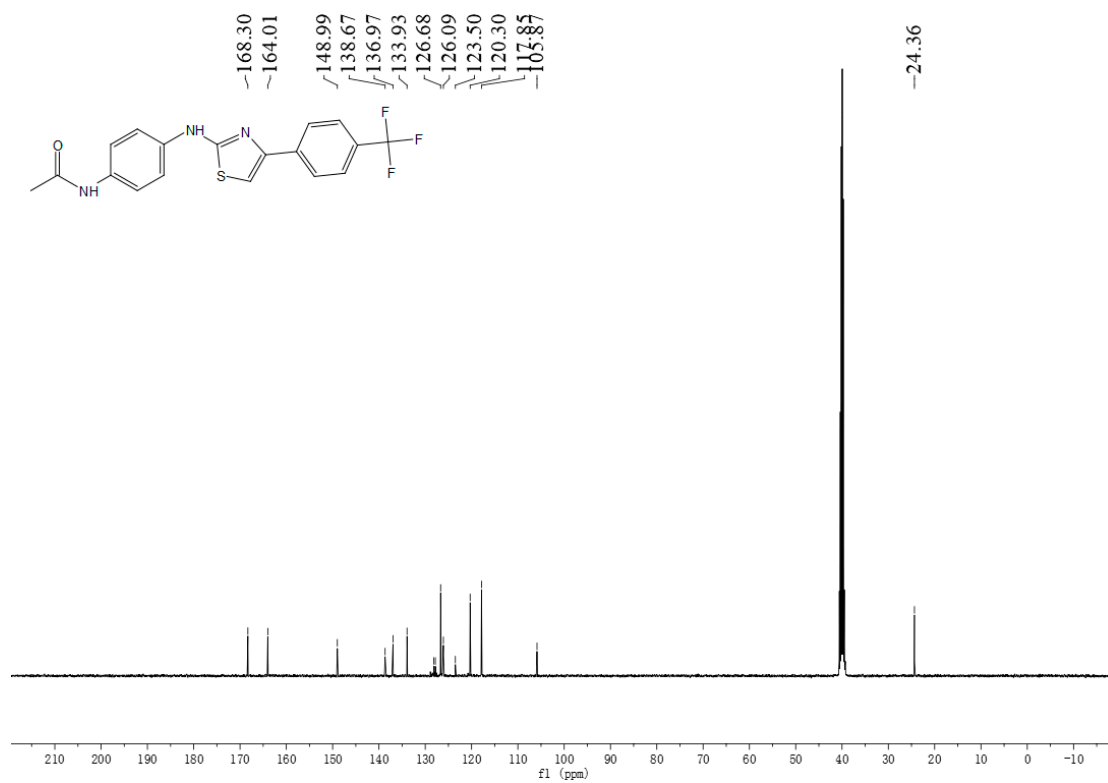

<sup>13</sup>C NMR spectrum of compound A<sub>9</sub>

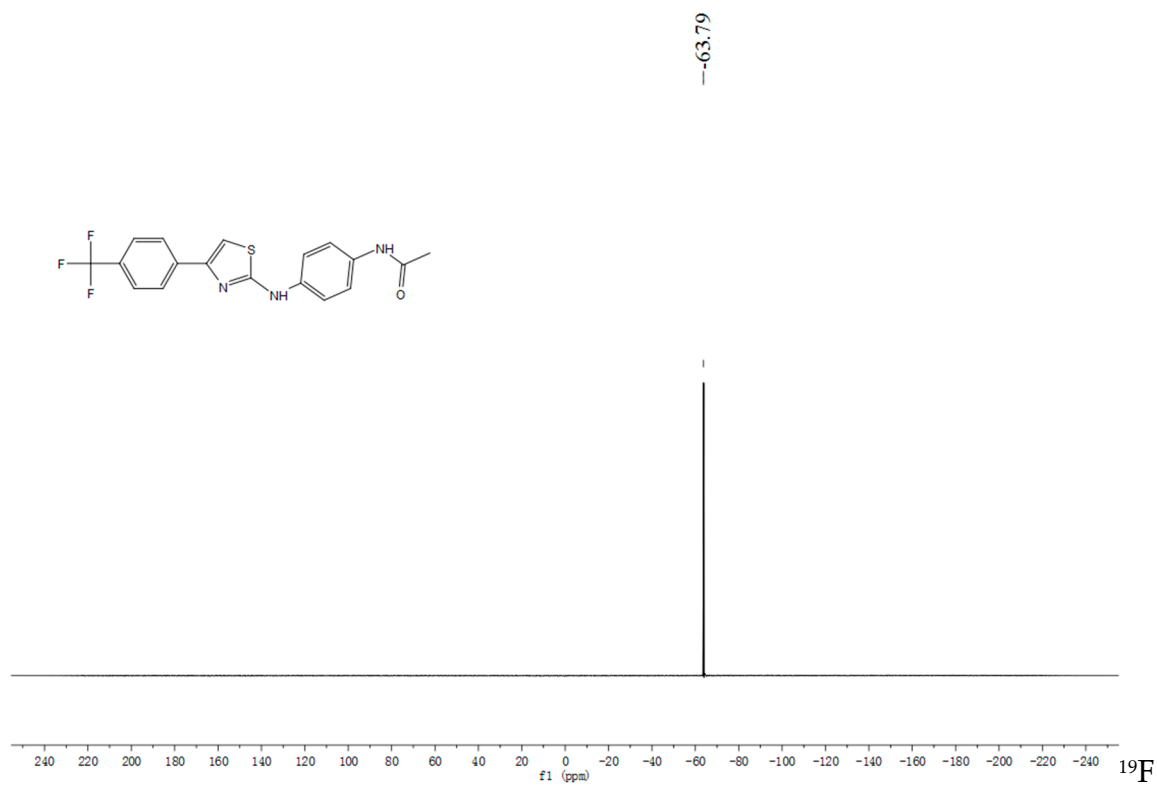

NMR spectrum of compound A<sub>9</sub>



2019102546 #43 RT: 0.42 AV: 1 NL: 3.50EB  
T: FTMS+pESI Full ms [100.0000-1000.0000]

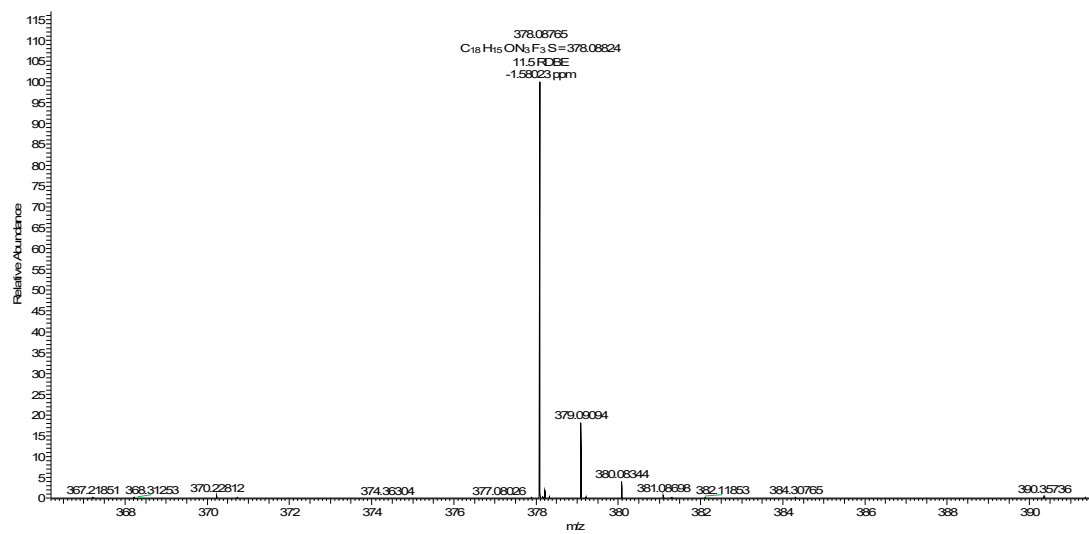

HRMS of compound A<sub>9</sub>

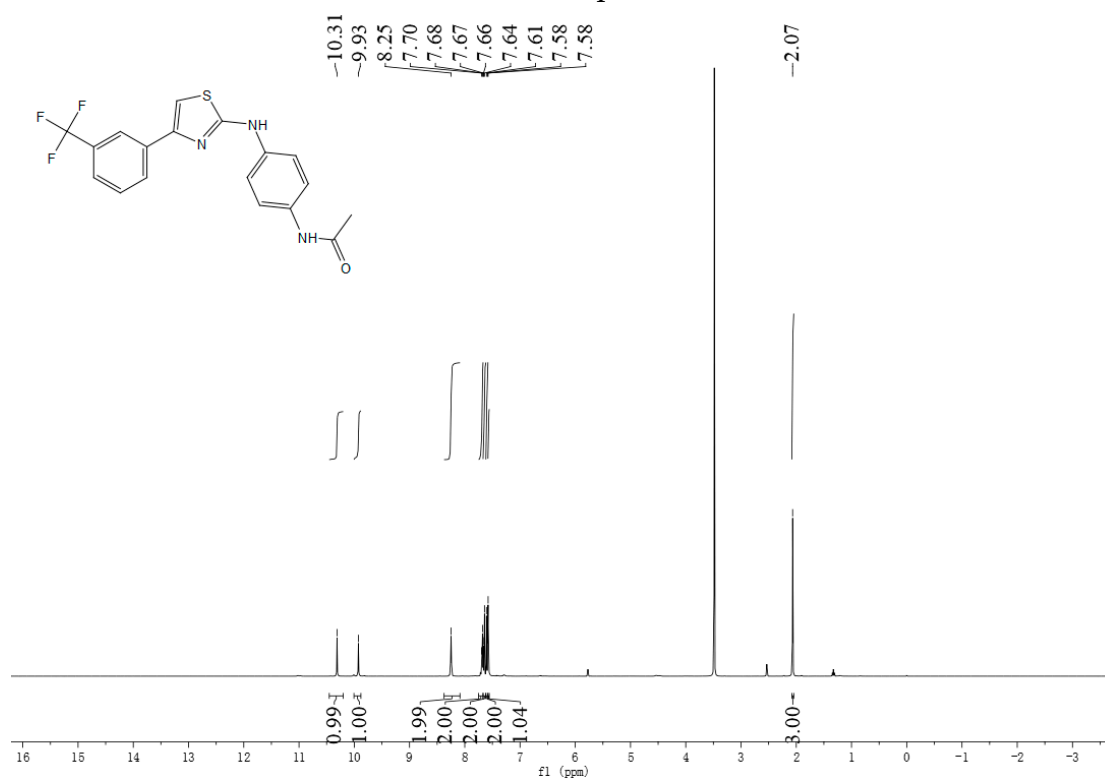

<sup>1</sup>H NMR spectrum of compound A<sub>10</sub>

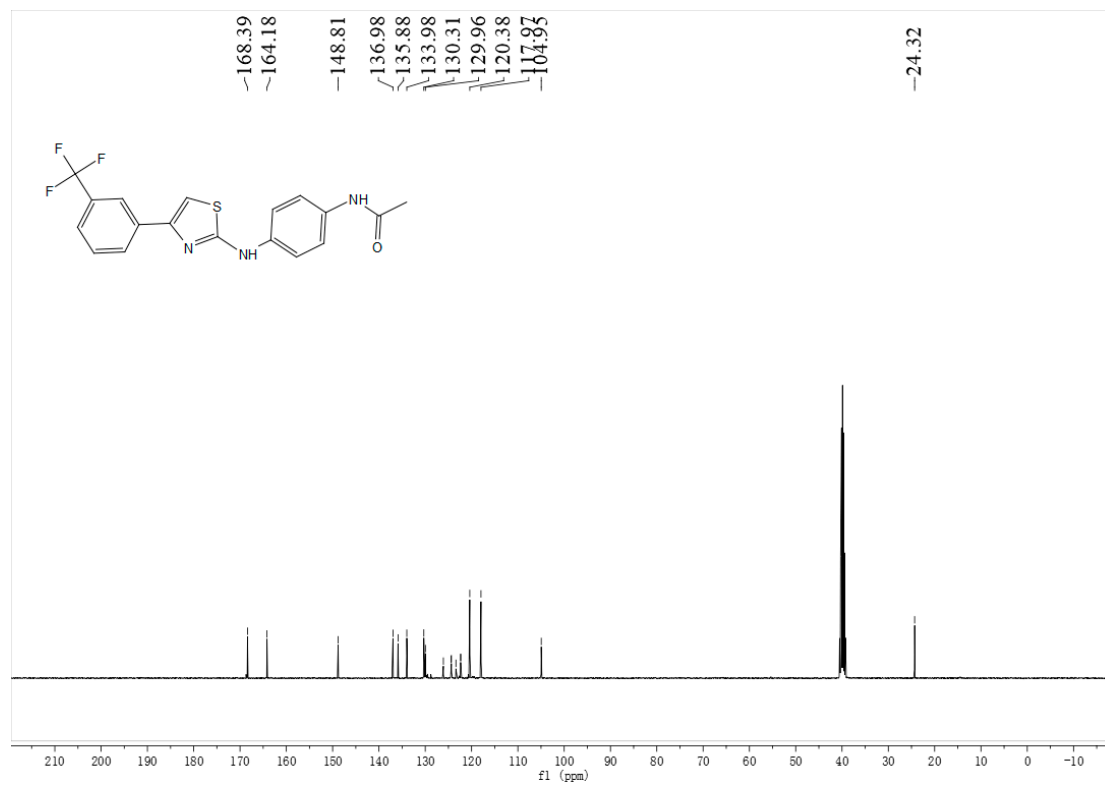

<sup>13</sup>C NMR spectrum of compound A<sub>10</sub>

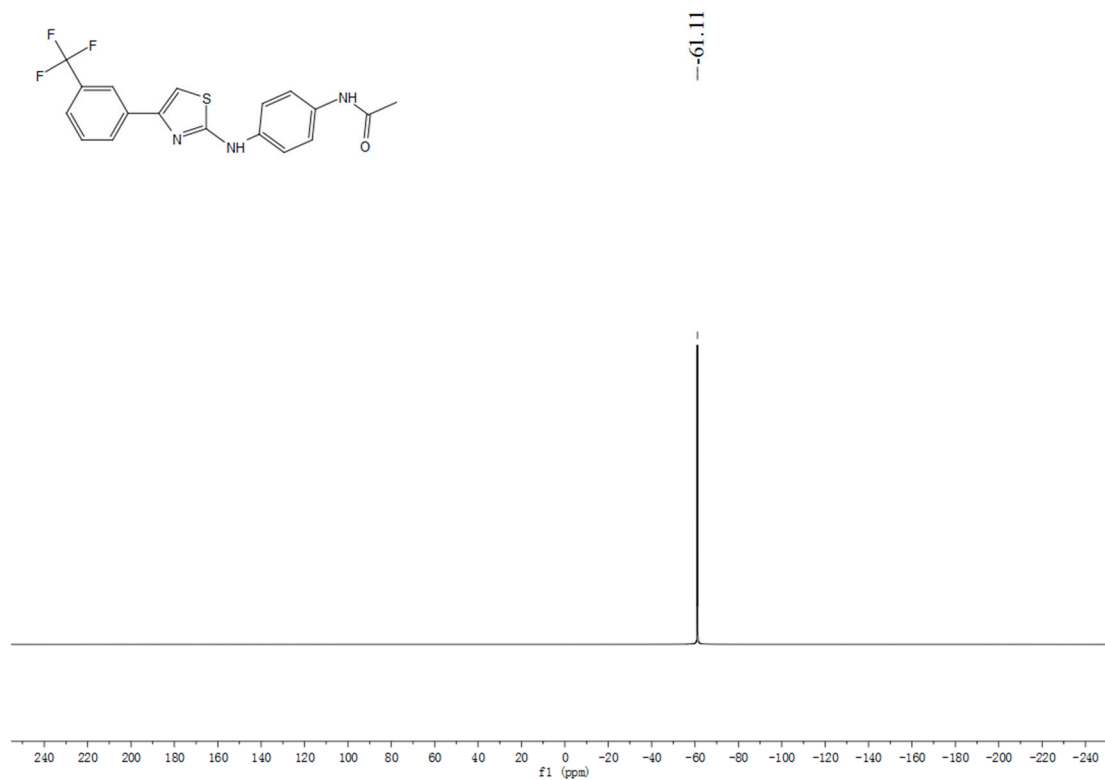

<sup>19</sup>F NMR spectrum of compound A<sub>10</sub>

2019102546 #43 RT: 0.42 AV: 1 NL: 3.50EB  
T: FTMS+pESI Full ms [100.0000-1000.0000]

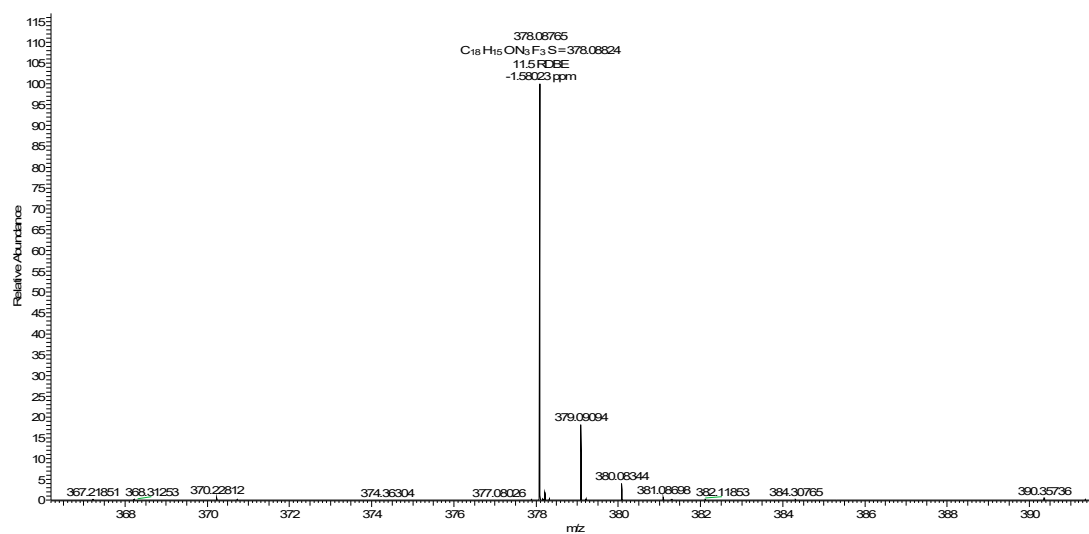HRMS of compound A<sub>10</sub>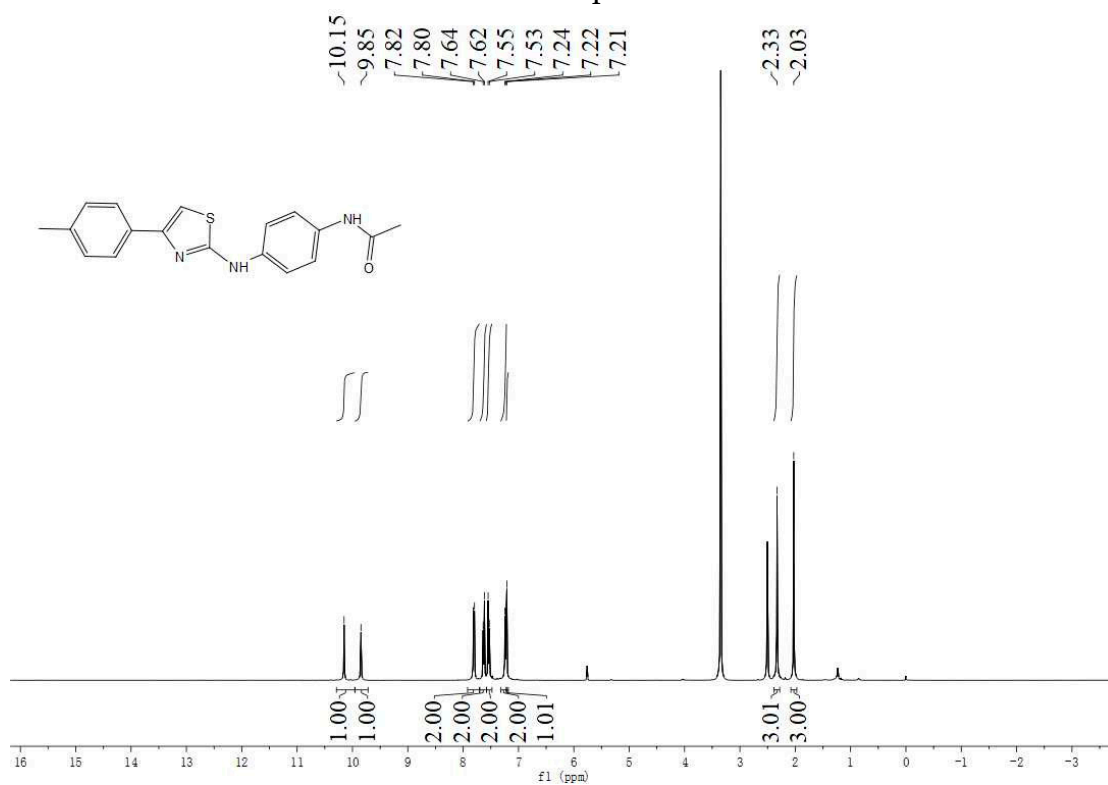<sup>1</sup>H NMR spectrum of compound A<sub>11</sub>

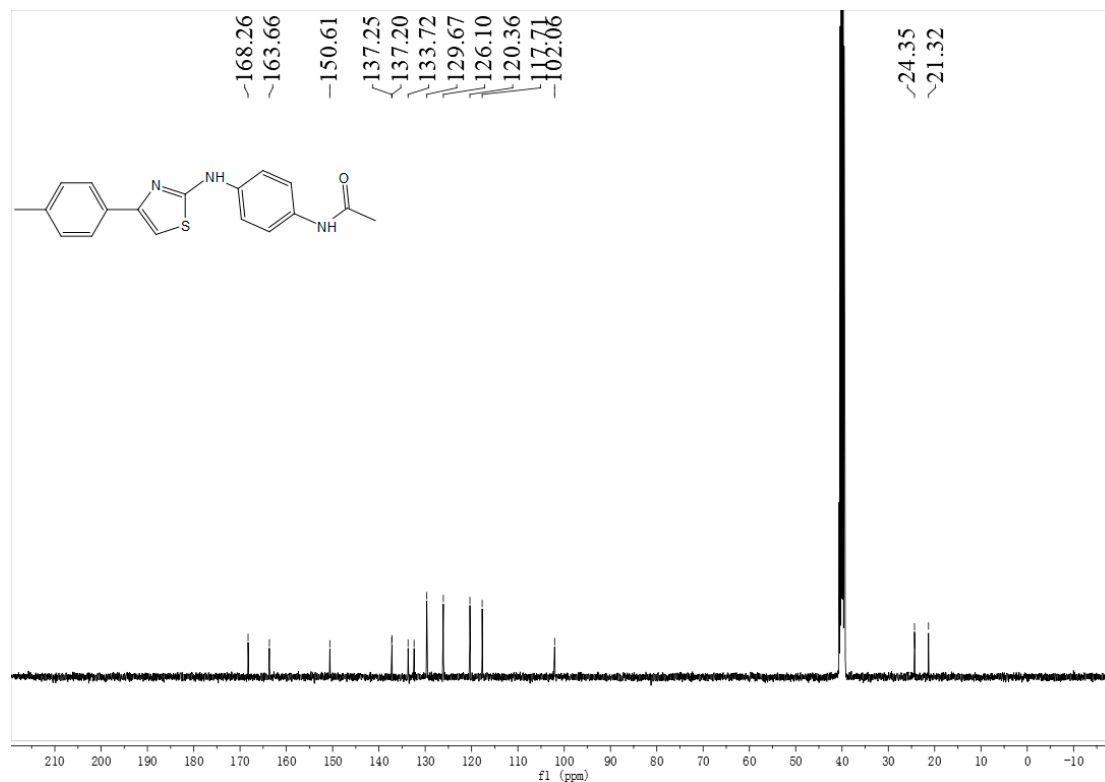

<sup>13</sup>C NMR spectrum of compound A<sub>11</sub>

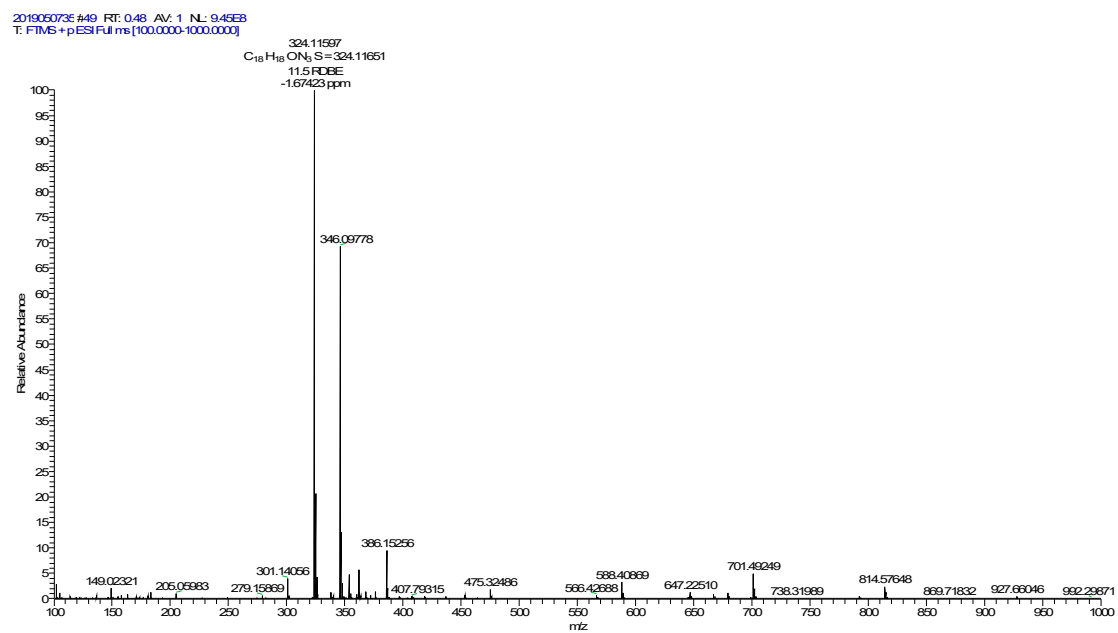

HRMS(ESI) of compound A<sub>11</sub>

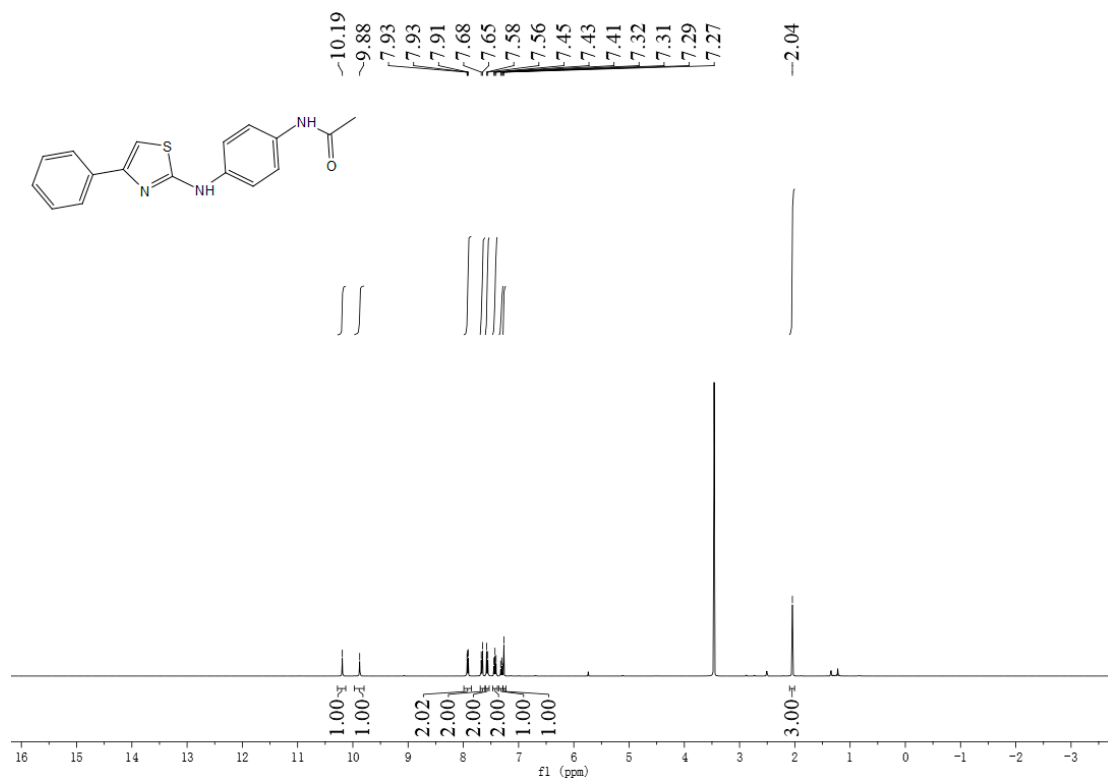

**<sup>1</sup>H NMR spectrum of compound A<sub>12</sub>**

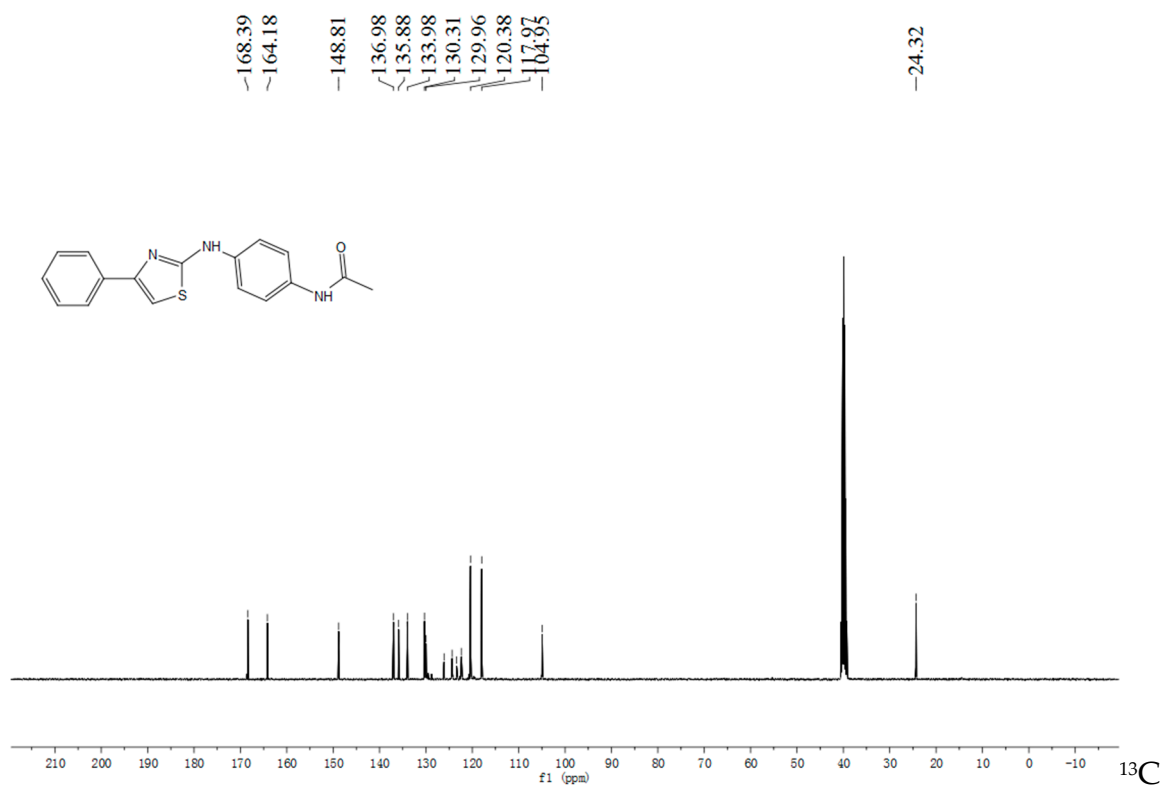

**NMR spectrum of compound A<sub>12</sub>**

2019102542 #41 RT: 0.40 AV: 1 NL: 288EB  
T: FTMS+pESI Full ms [100.0000-1000.0000]

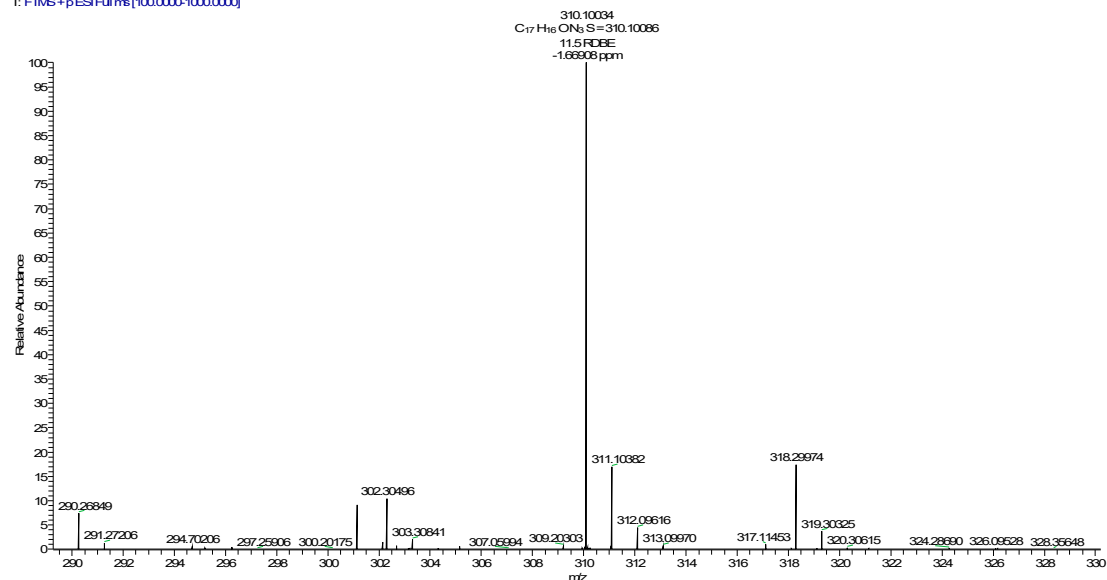

HRMS(ESI) of compound A<sub>12</sub>

-10.24  
-9.80  
7.95  
7.91  
7.89  
7.83  
7.61  
7.59  
7.57  
7.49  
7.46  
7.45  
7.38  
7.37  
2.34  
2.32  
2.30  
2.29  
1.12  
1.10  
1.08

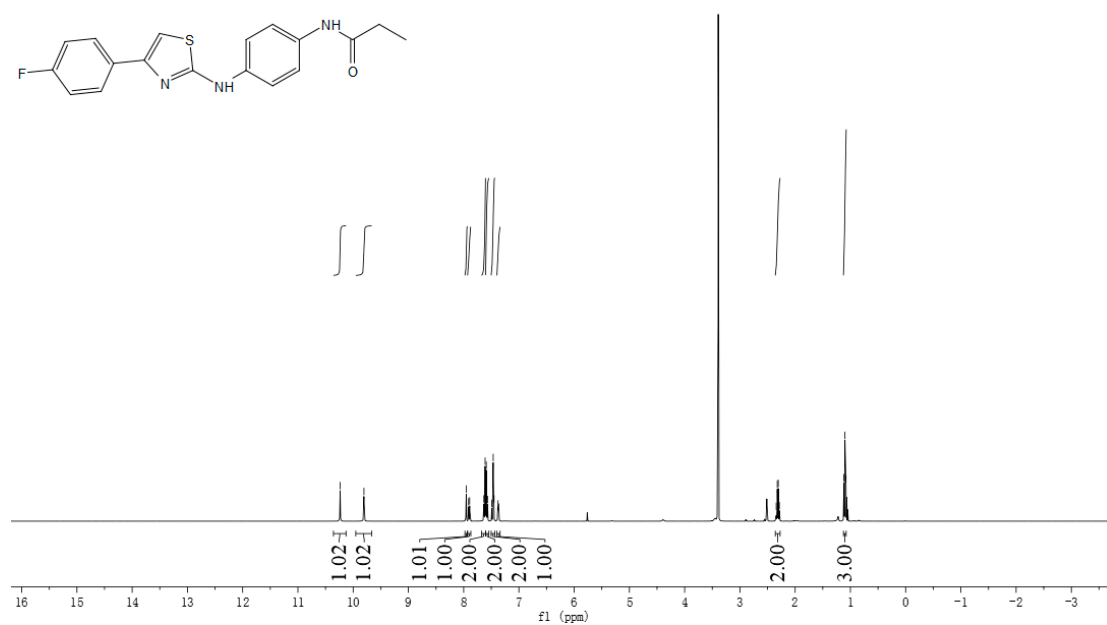

<sup>1</sup>H NMR spectrum of compound A<sub>13</sub>

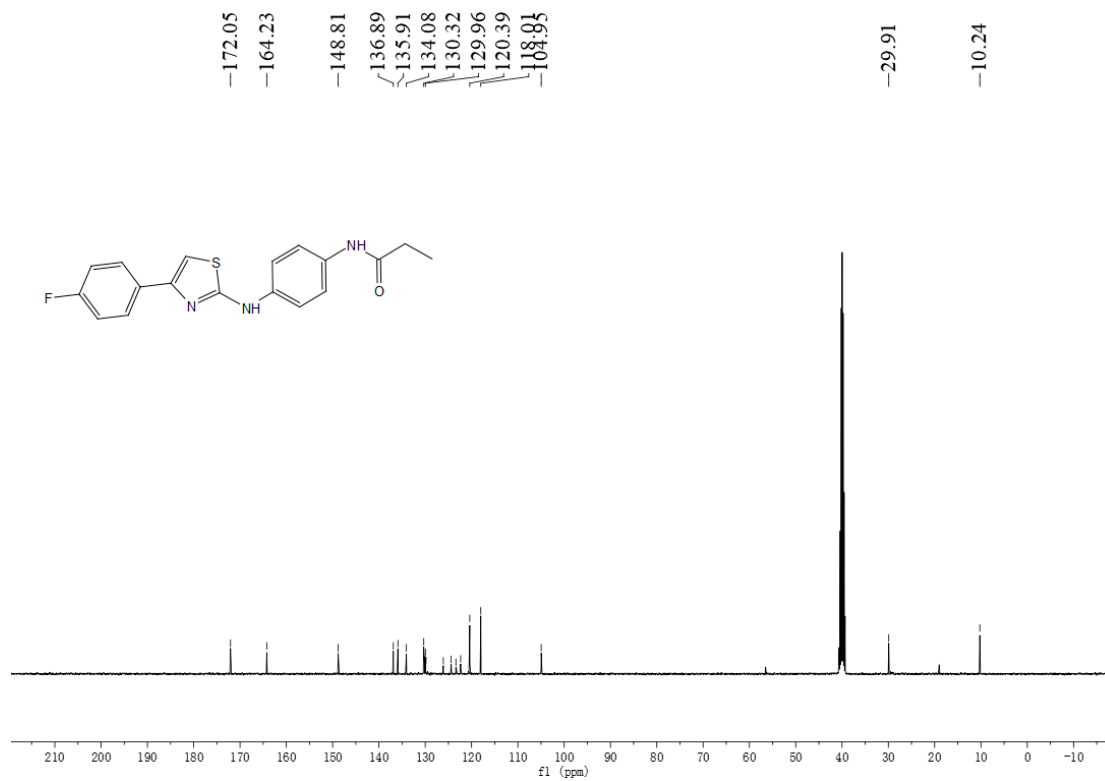

<sup>13</sup>C NMR spectrum of compound **A**<sub>13</sub>

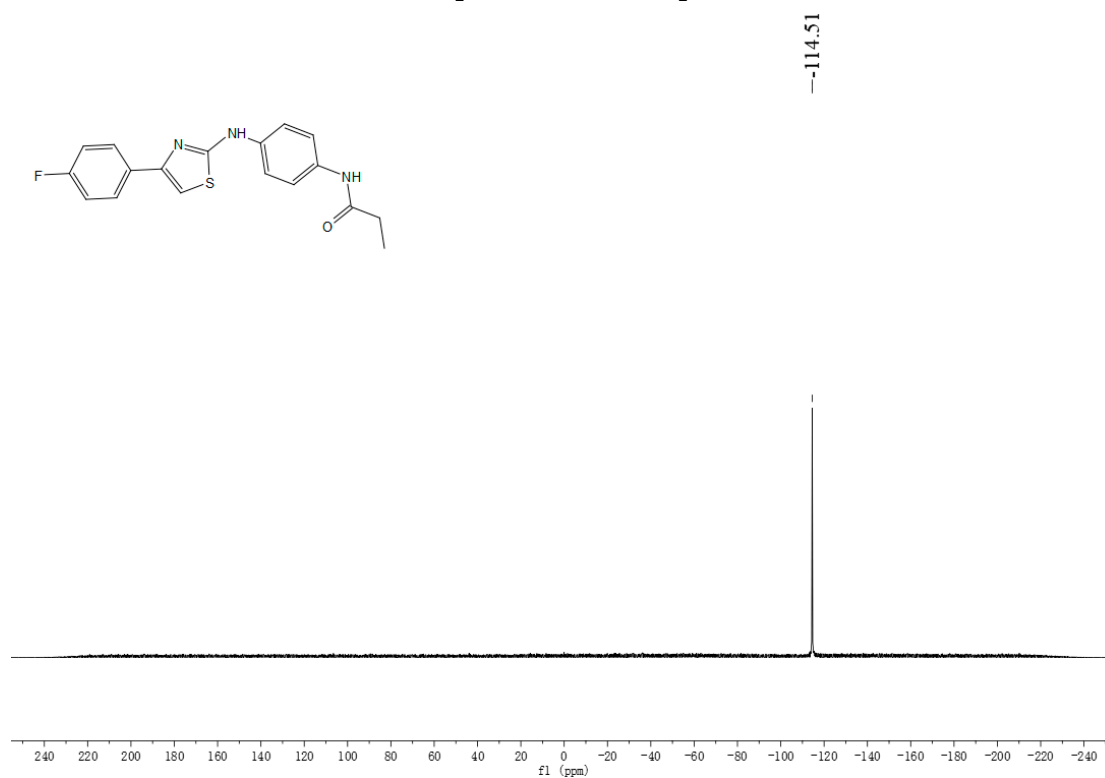

<sup>19</sup>F NMR spectrum of compound **A**<sub>13</sub>

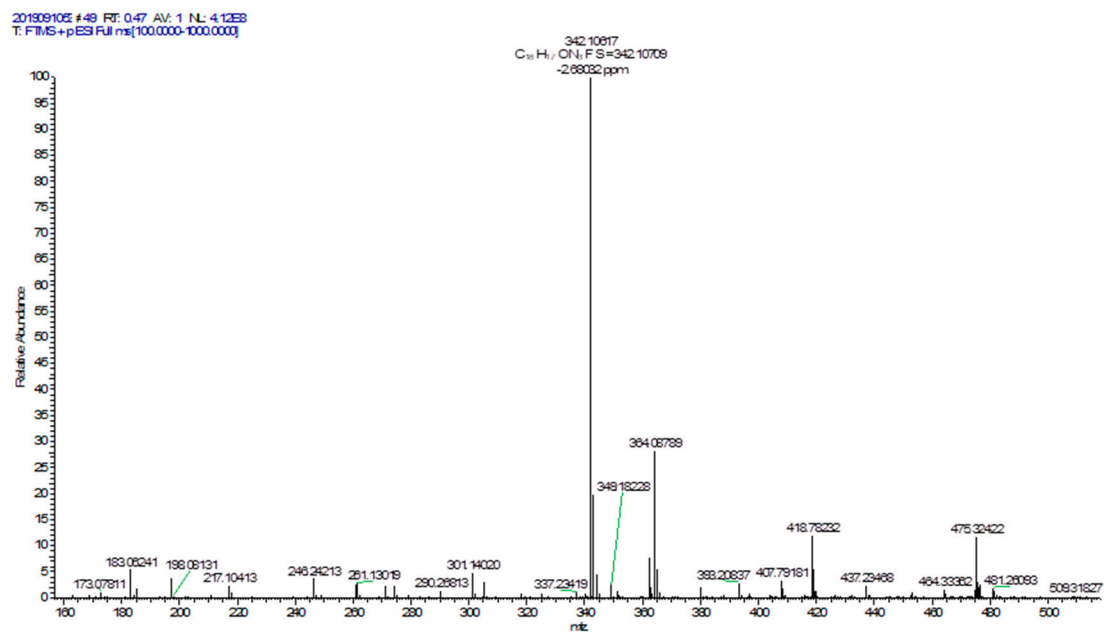HRMS(ESI) of compound A<sub>13</sub>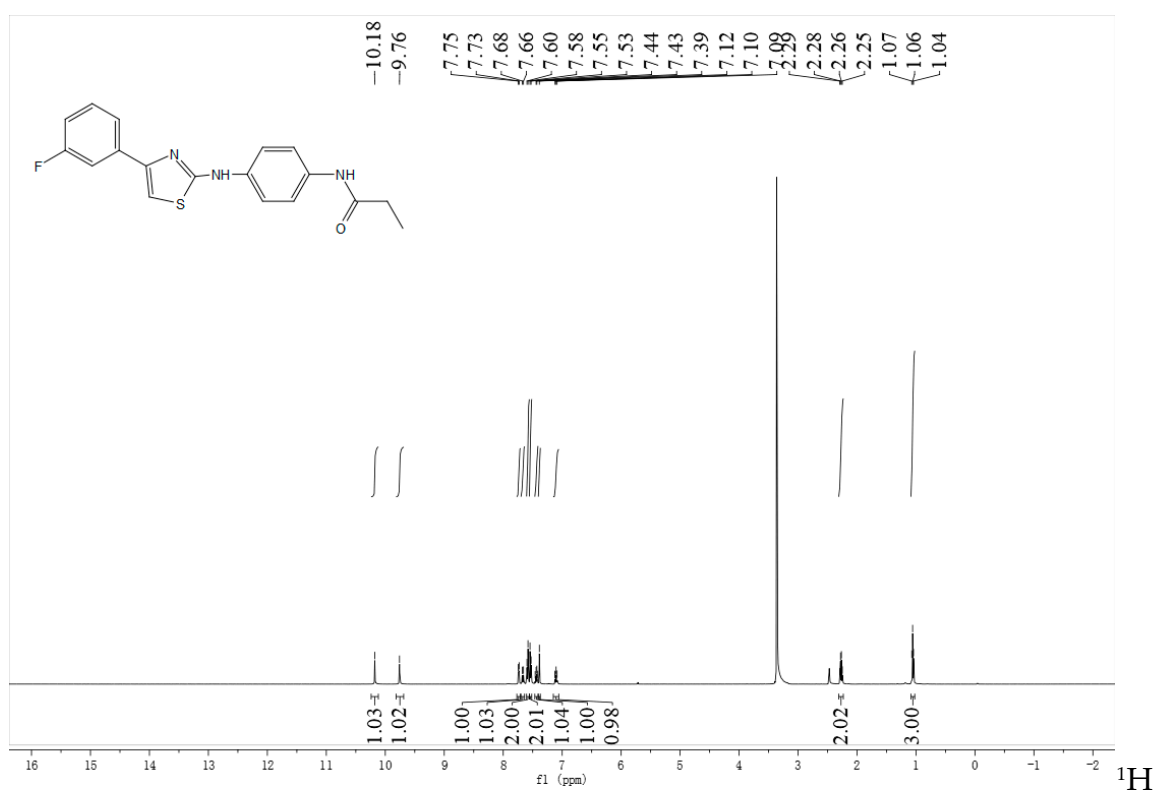NMR spectrum of compound A<sub>14</sub>



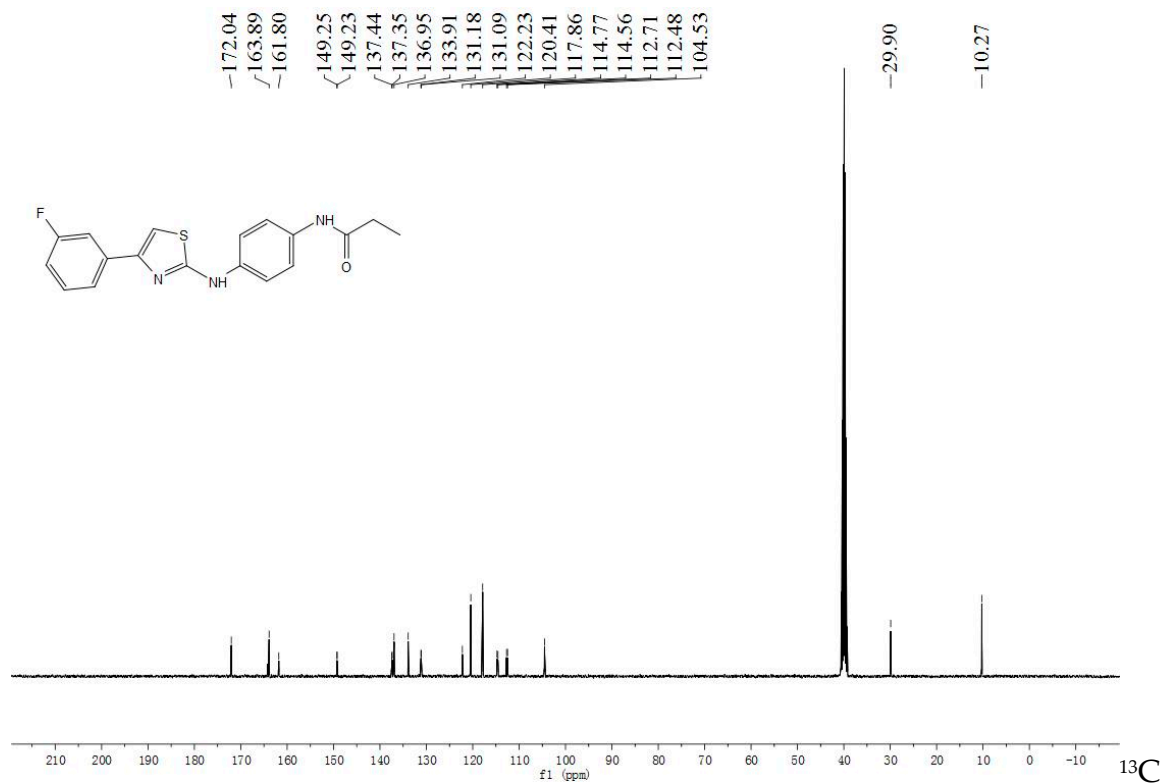NMR spectrum of compound A<sub>14</sub>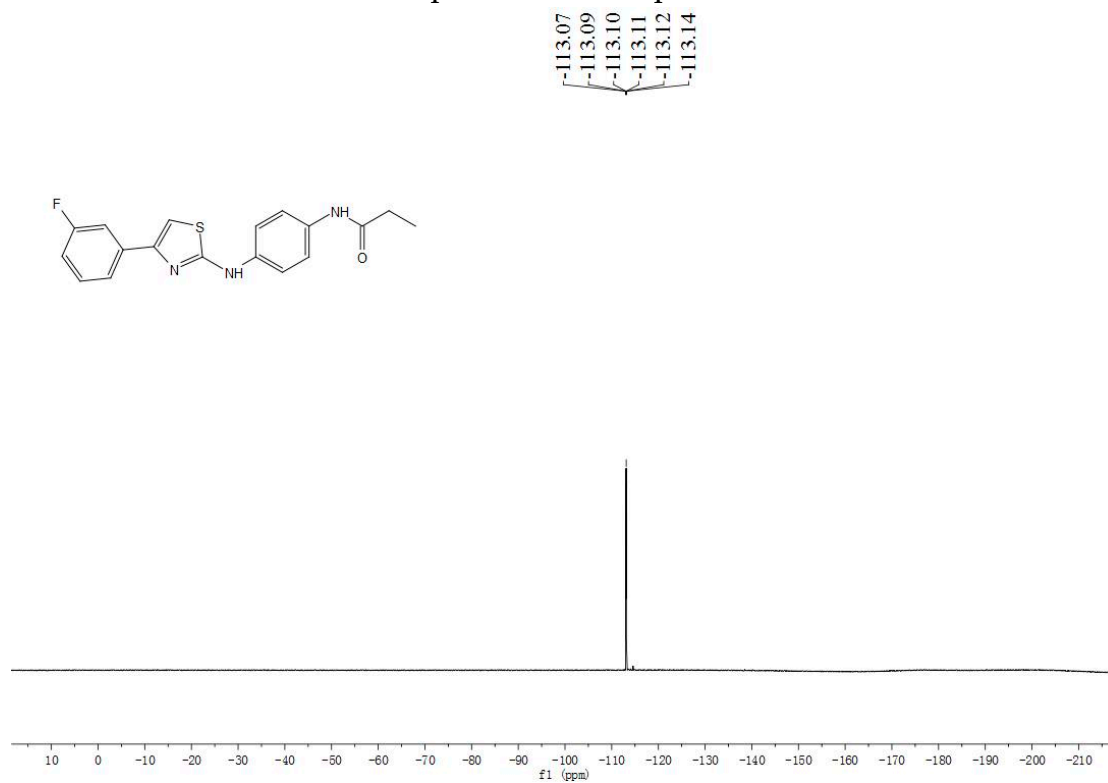<sup>19</sup>F NMR spectrum of compound A<sub>14</sub>

2019091053 #49 RT: 0.47 AV: 1 NL: 4.12E8  
T: FTMS + pESI Full ms [100.0000-1000.0000]

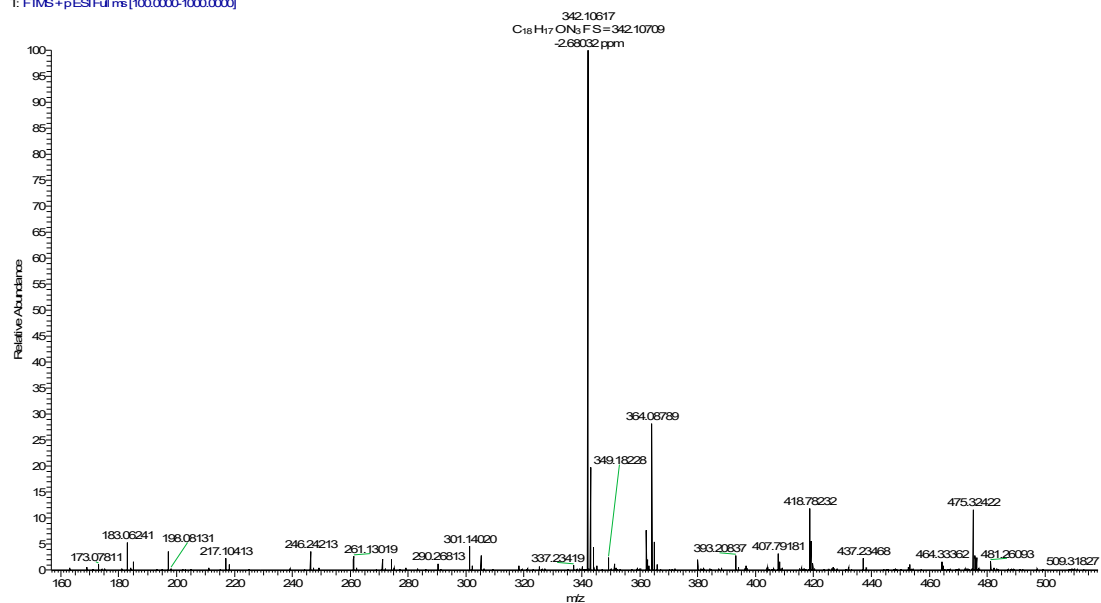

HRMS(ESI) of compound A<sub>14</sub>

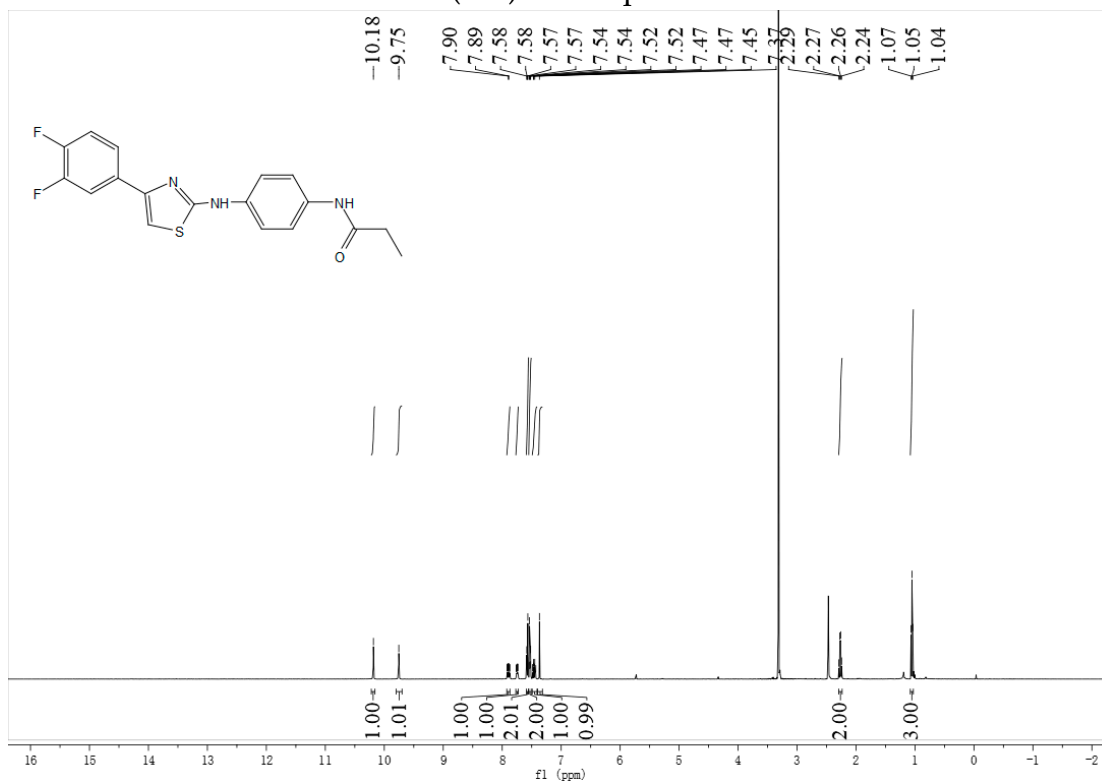

<sup>1</sup>H NMR spectrum of compound A<sub>15</sub>

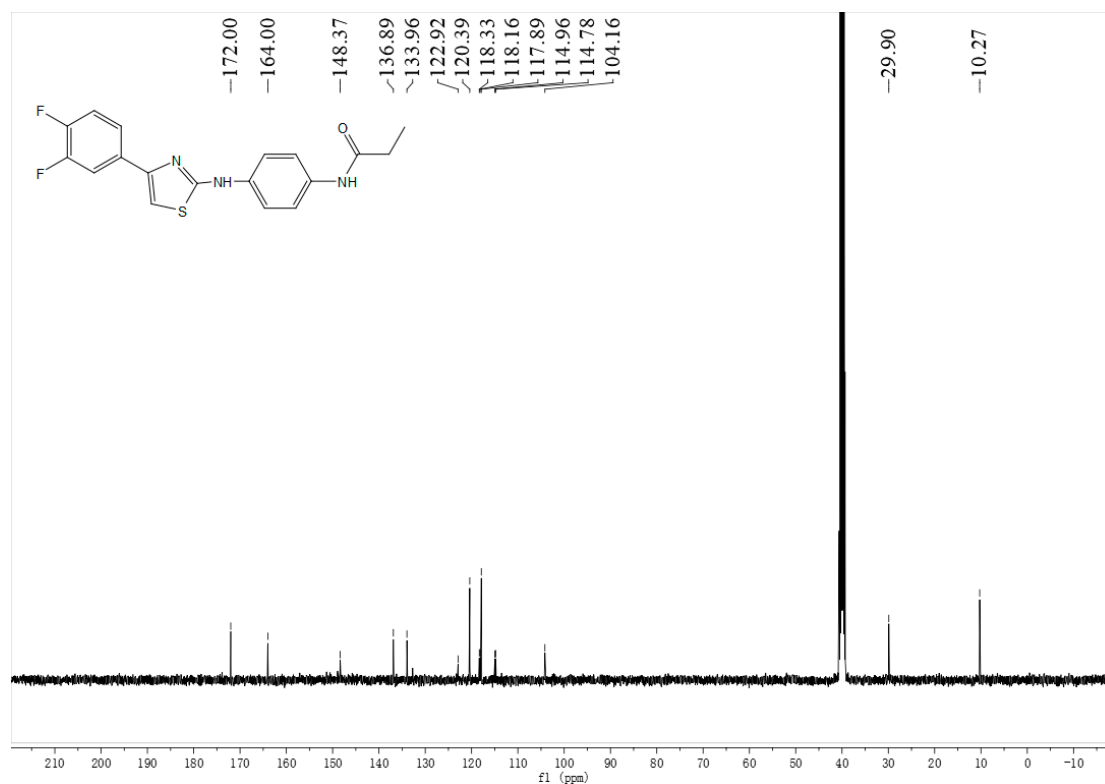

<sup>13</sup>C NMR spectrum of compound A<sub>15</sub>

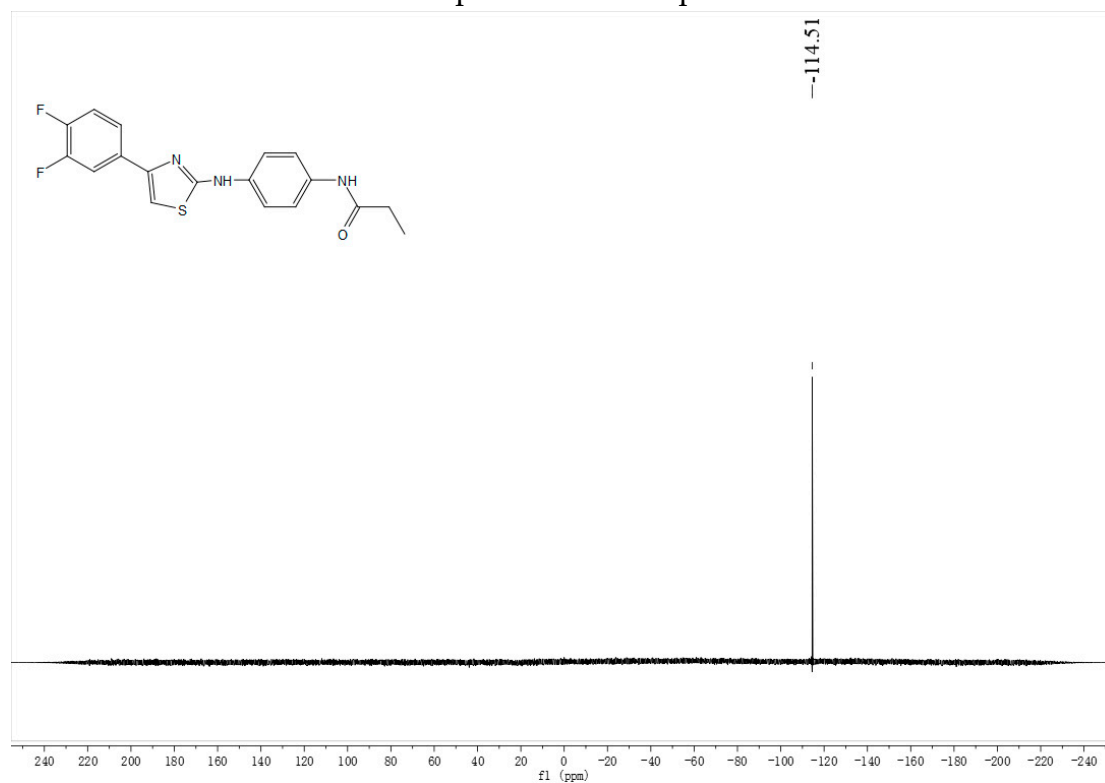

<sup>19</sup>F NMR spectrum of compound A<sub>15</sub>

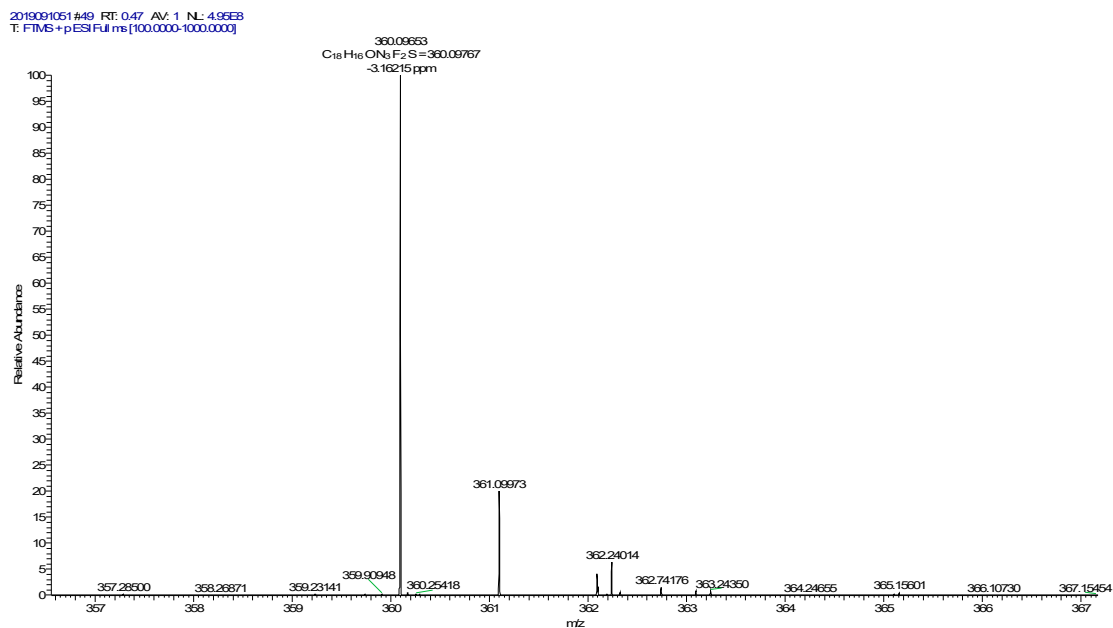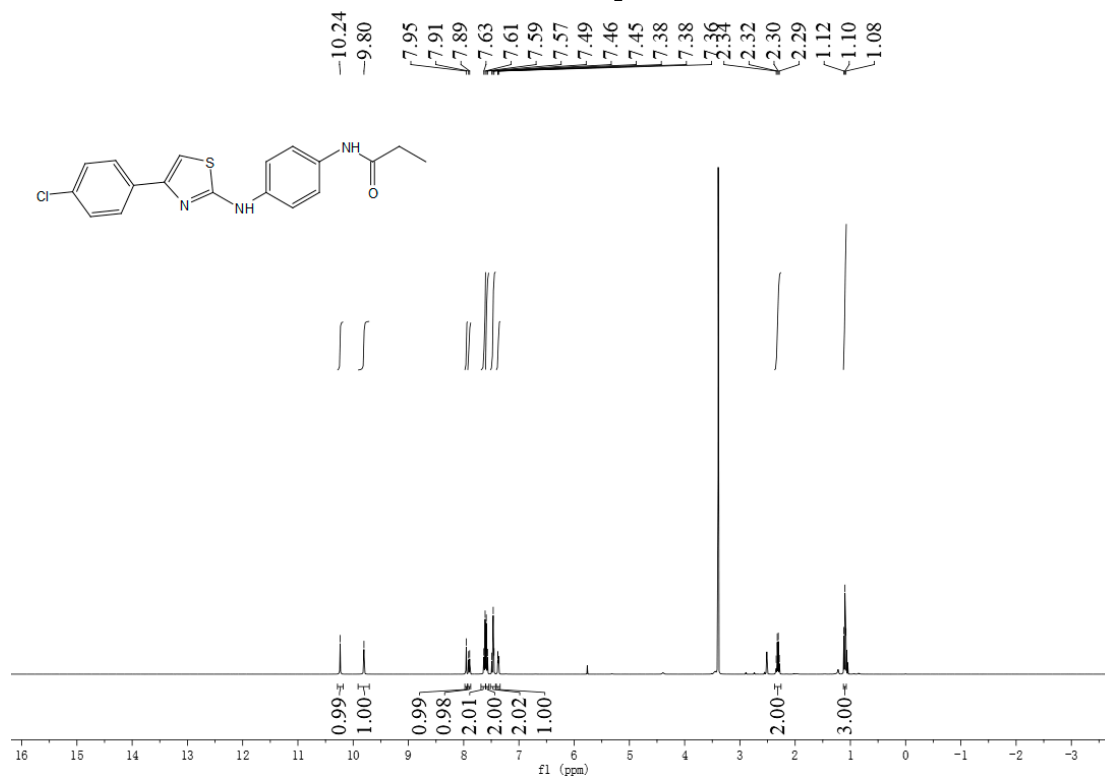<sup>1</sup>H NMR spectrum of compound A<sub>16</sub>

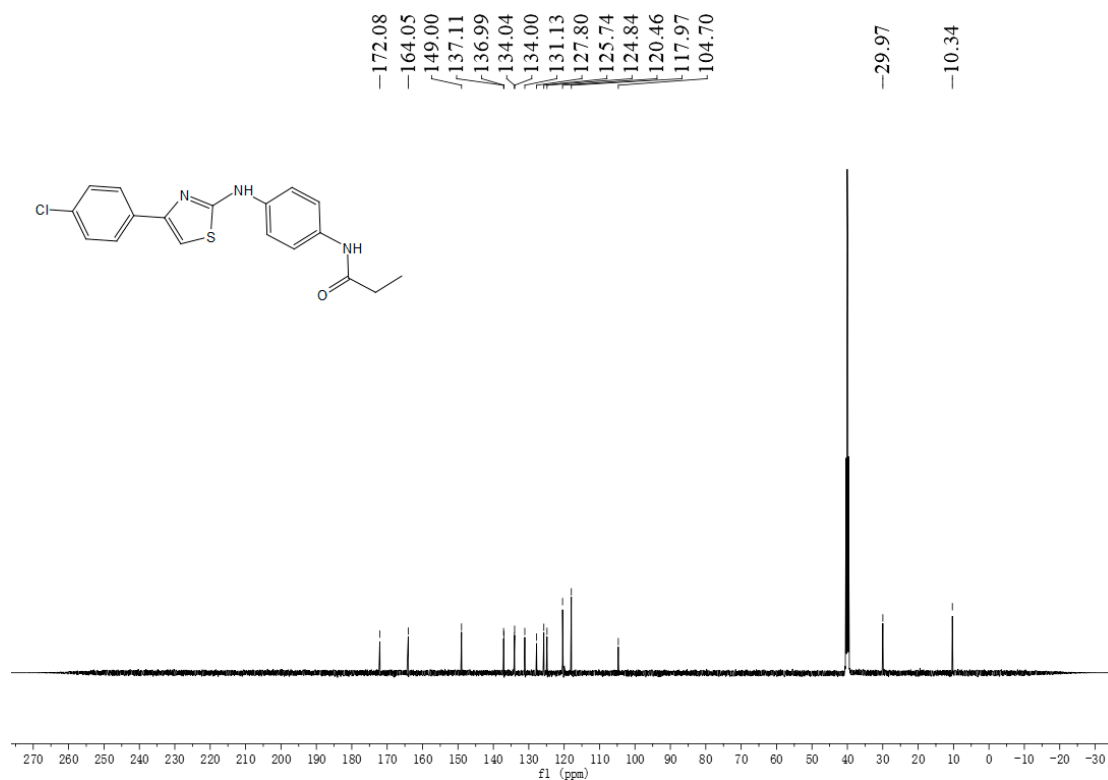<sup>13</sup>C NMR spectrum of compound A<sub>16</sub>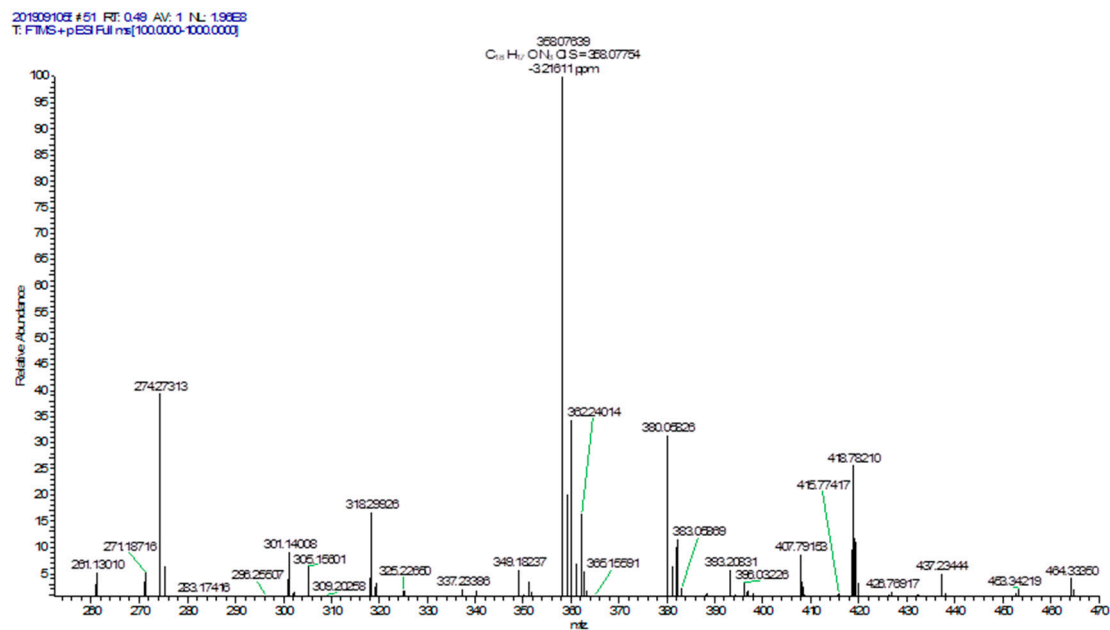HRMS(ESI) of compound A<sub>16</sub>

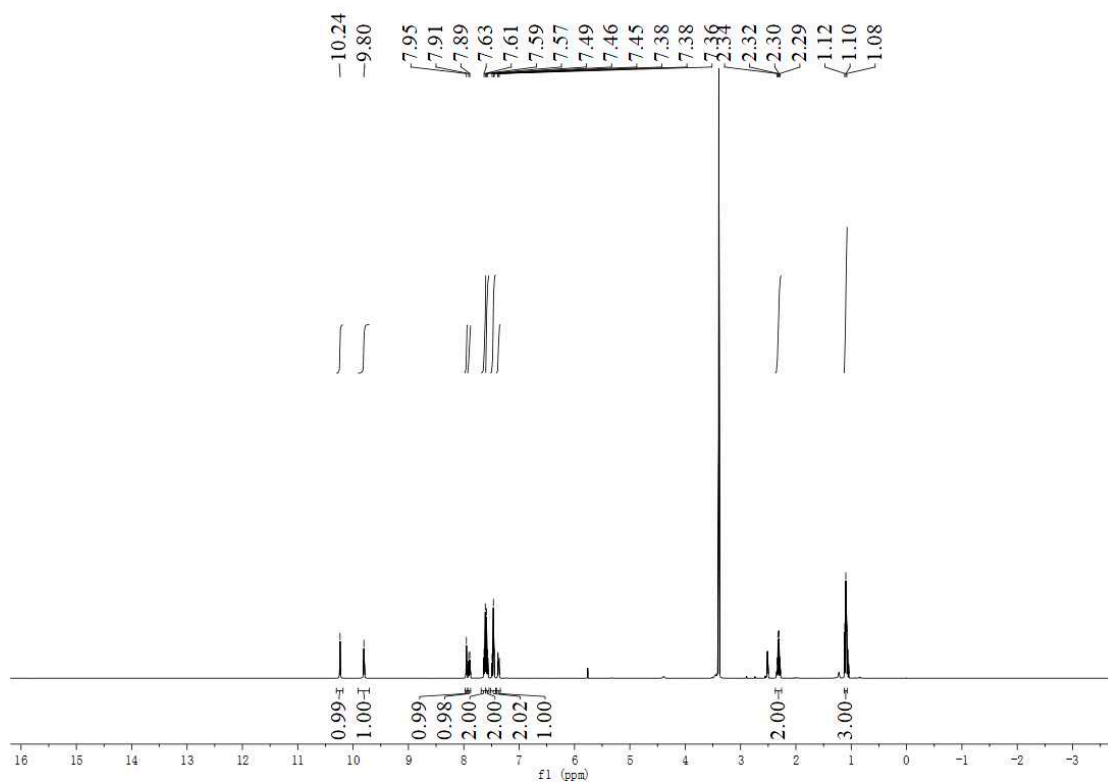

<sup>1</sup>H NMR spectrum of compound A<sub>17</sub>

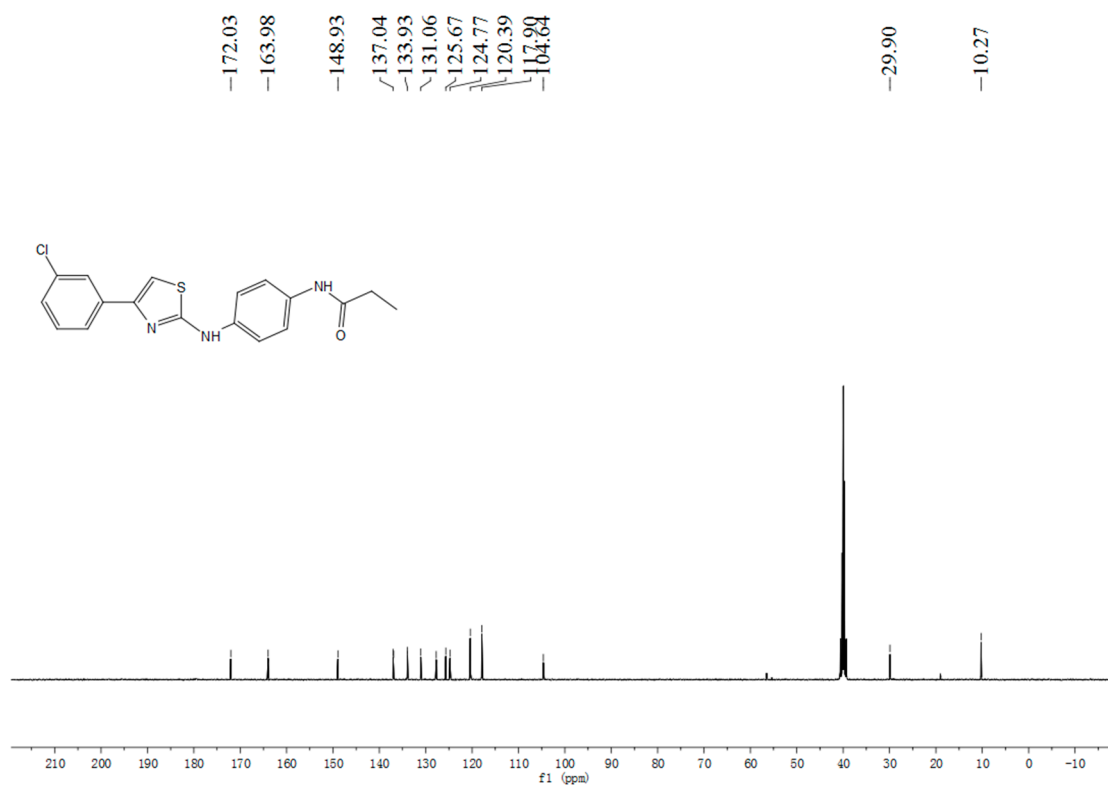

<sup>13</sup>C NMR spectrum of compound A<sub>17</sub>

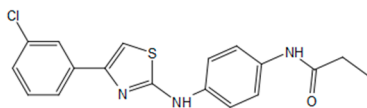

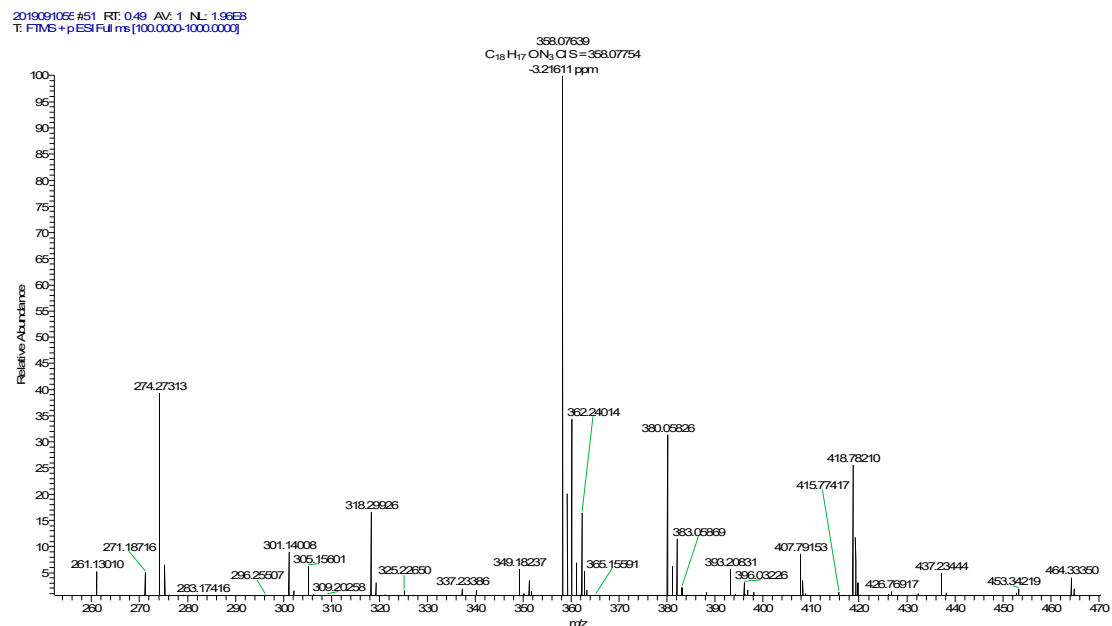HRMS(ESI) of compound **A17**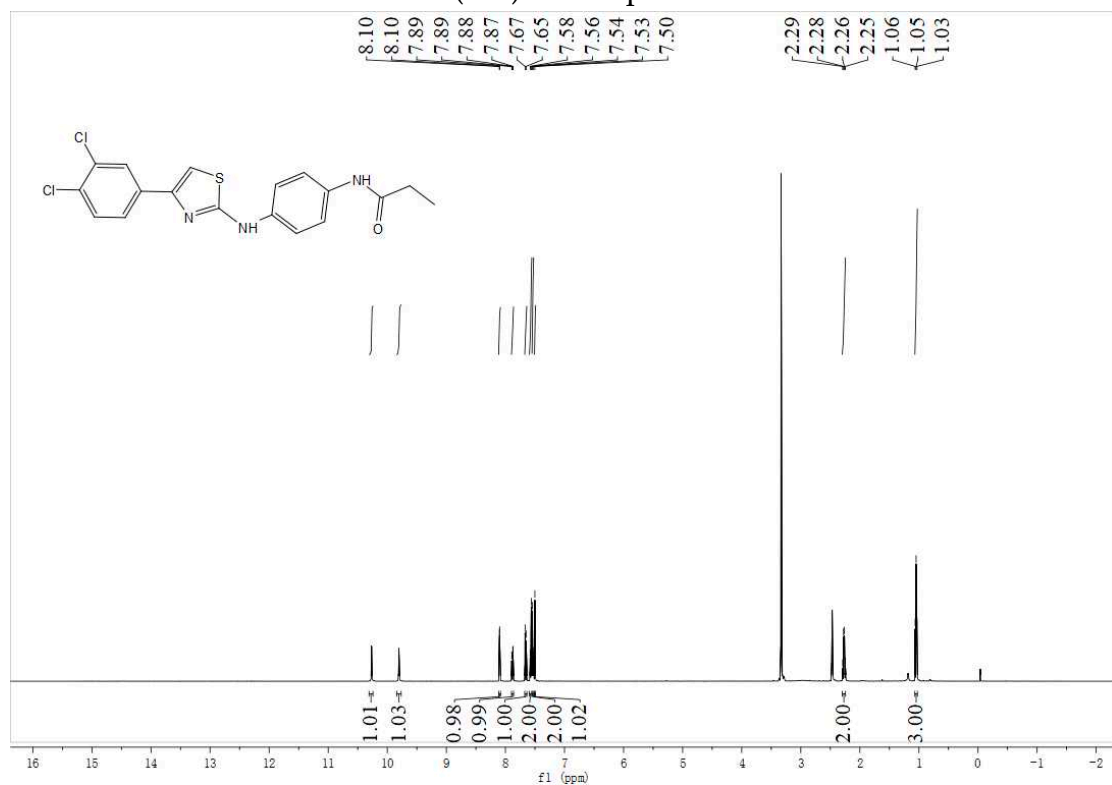<sup>1</sup>H NMR spectrum of compound **A18**

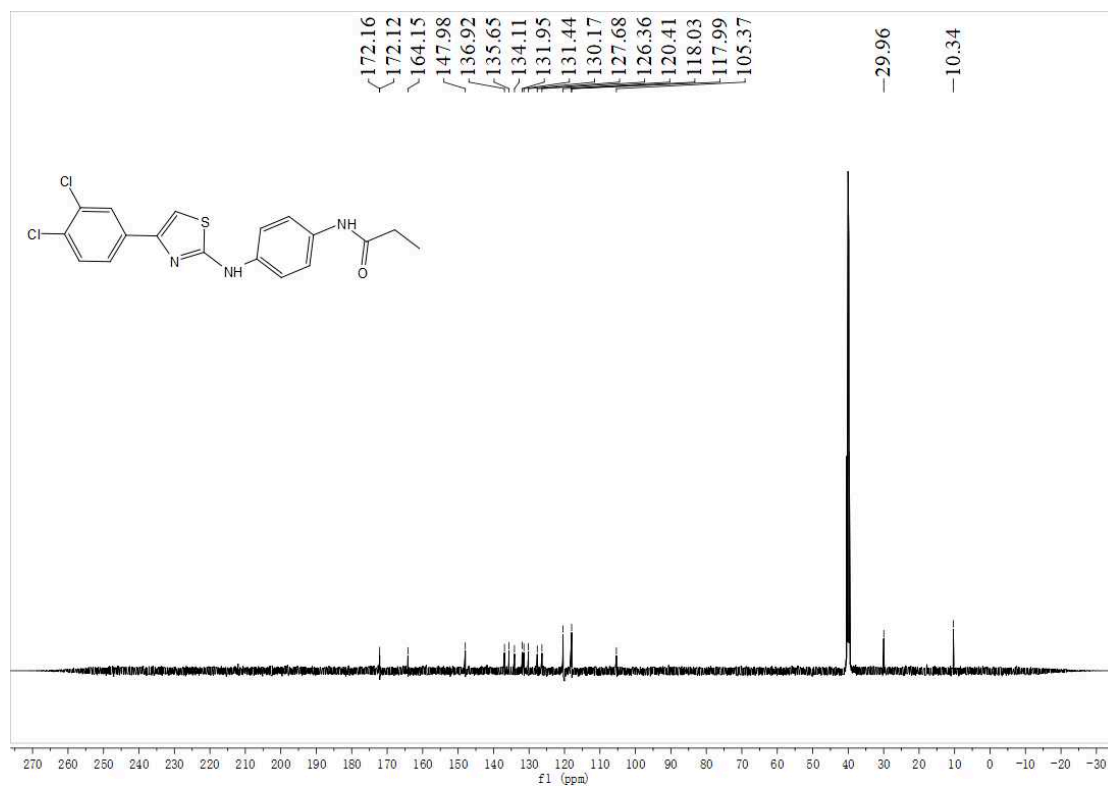<sup>13</sup>C NMR spectrum of compound A<sub>18</sub>

2019091048 #63 RT: 0.60 AV: 1 NL: 1.33E7  
T: FTMS + pESI Full ms [100.0000-1000.0000]

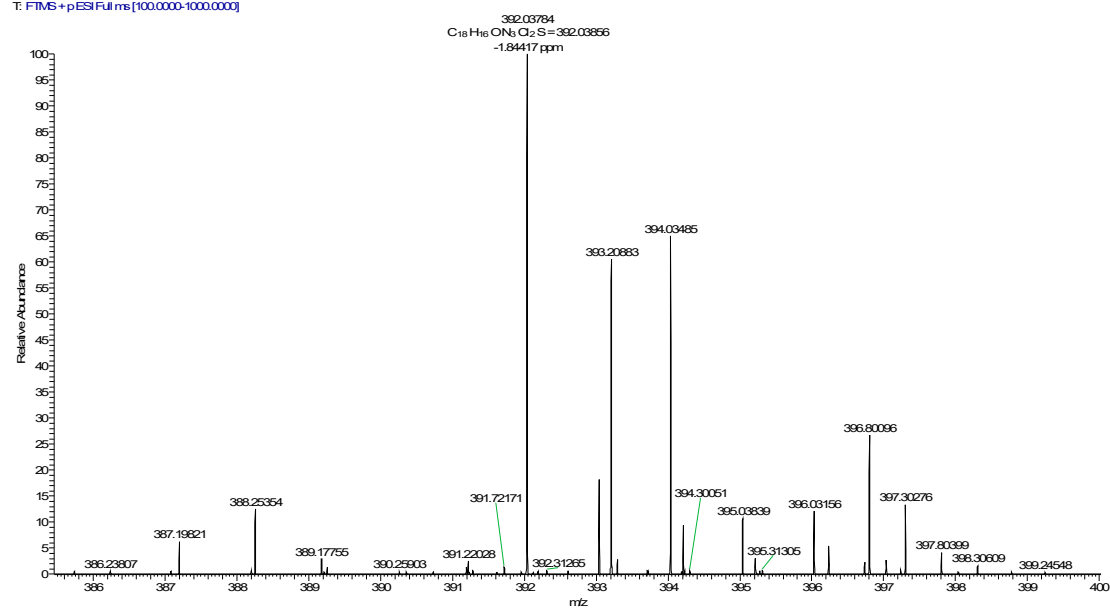HRMS(ESI) of compound A<sub>18</sub>



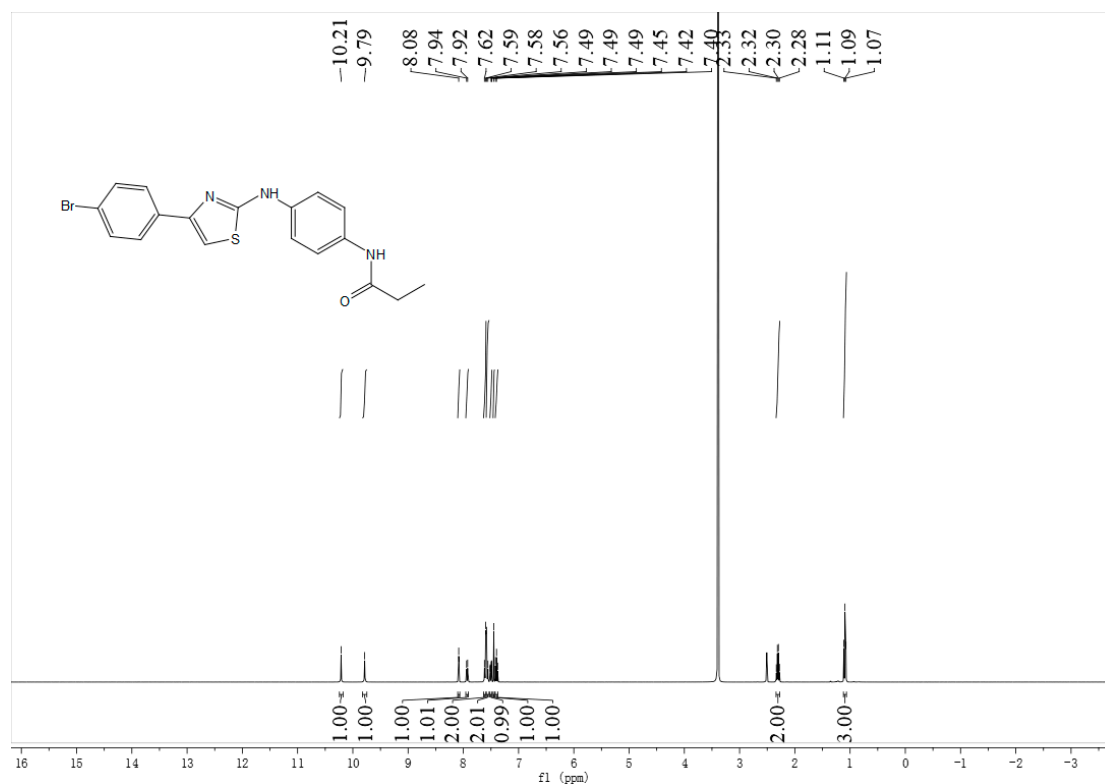

<sup>1</sup>H NMR spectrum of compound A<sub>19</sub>

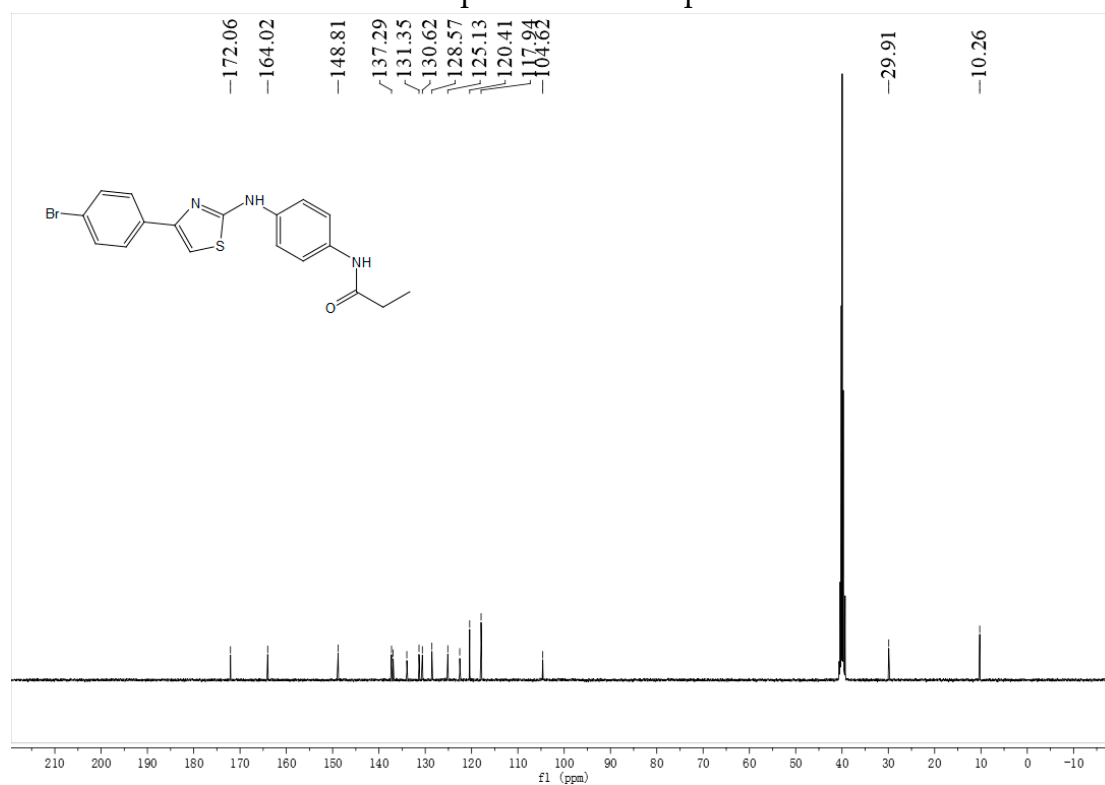

<sup>13</sup>C NMR spectrum of compound A<sub>19</sub>

201909105C #55 RT: 0.53 AV: 1 NL: 2.62E8  
T: FTMS +pESI Full ms [100.0000-1000.0000]

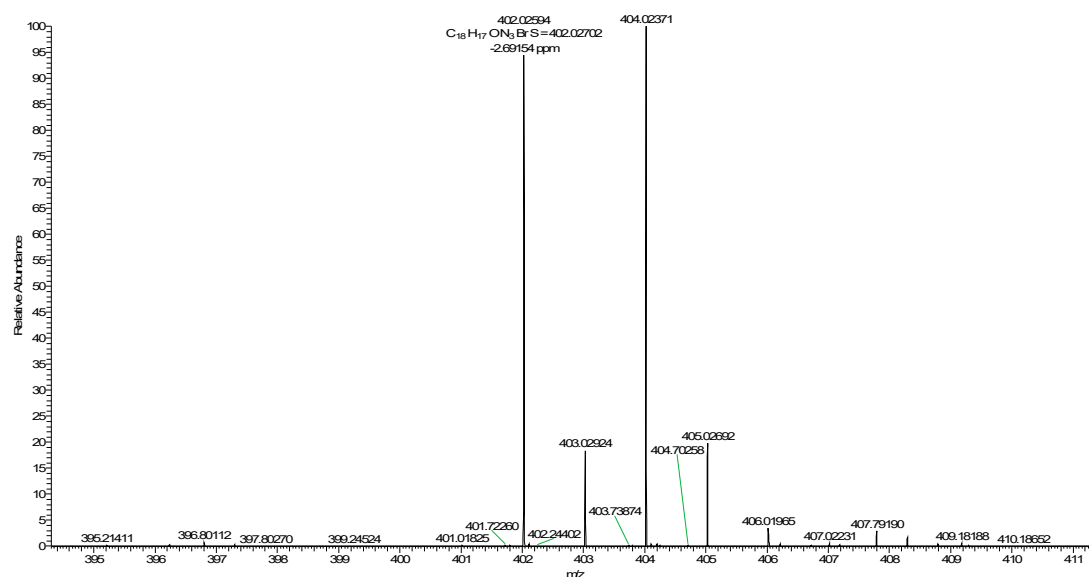

HRMS(ESI) of compound A19

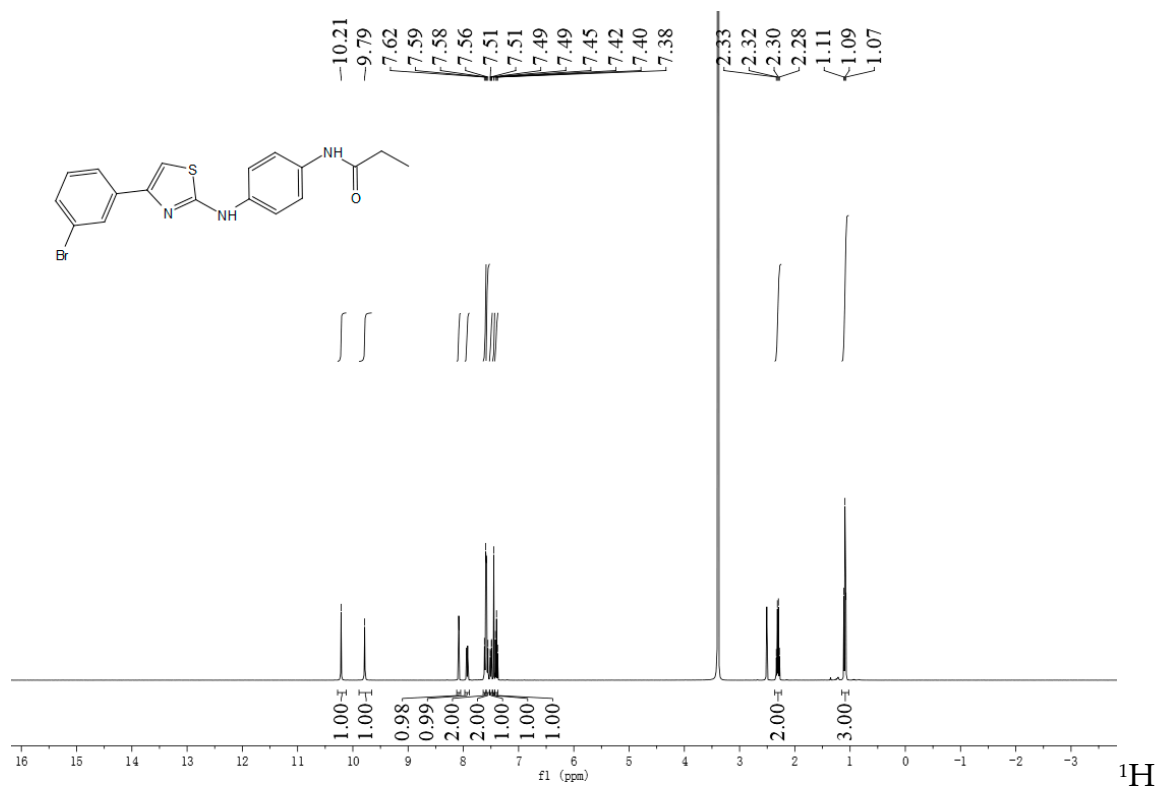

NMR spectrum of compound A20

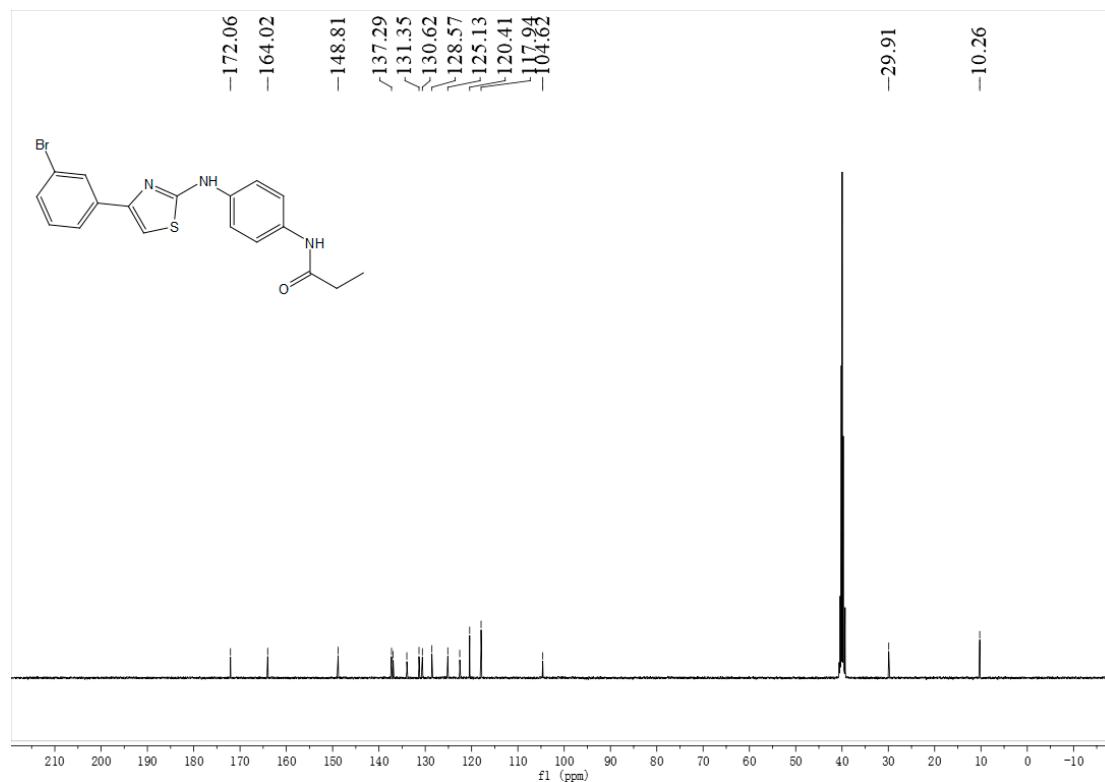<sup>13</sup>C NMR spectrum of compound A<sub>20</sub>

2019091066 #57 RT: 0.55 AM: 1 NL: 6.00E7  
T: FTMS+ pESI Full ms [100.000-1000.000]

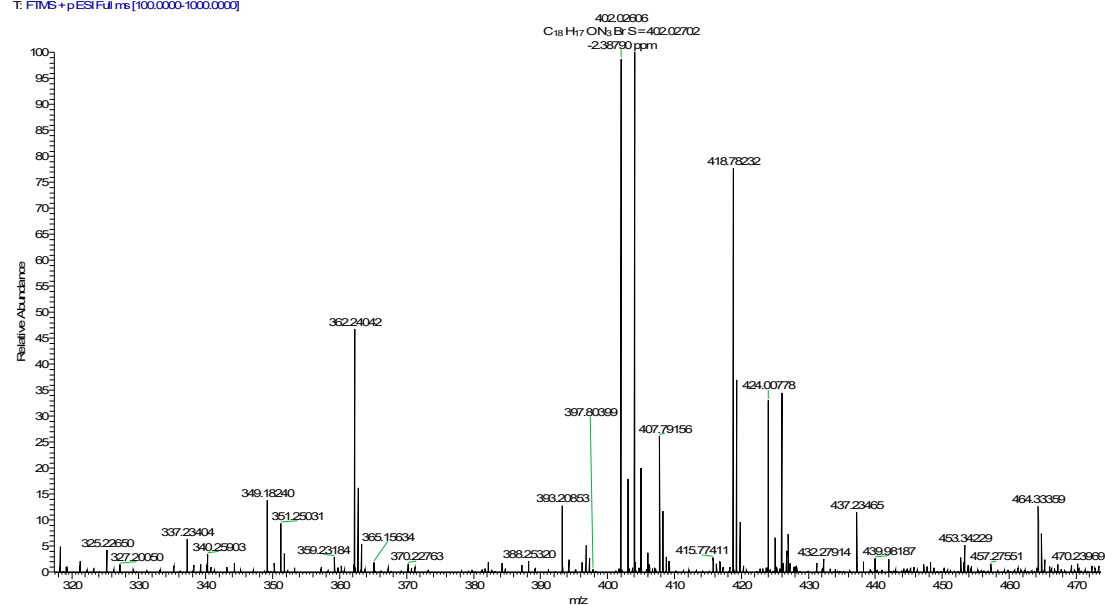HRMS(ESI) of compound A<sub>20</sub>

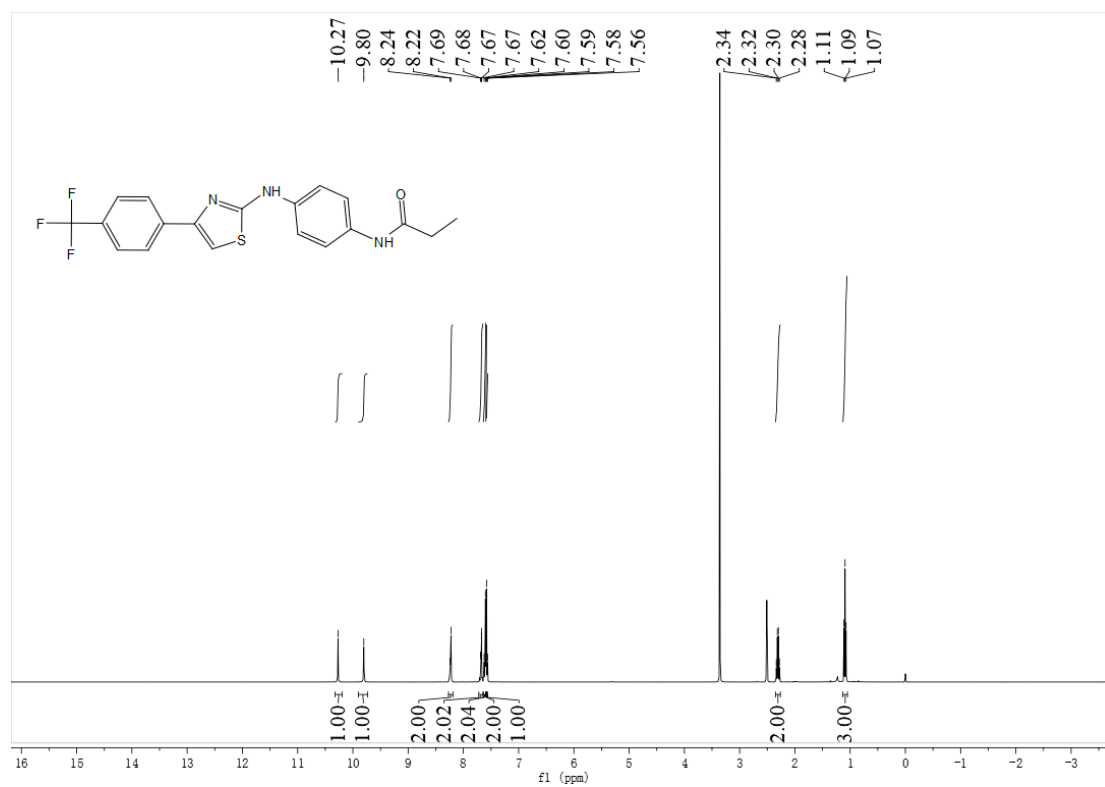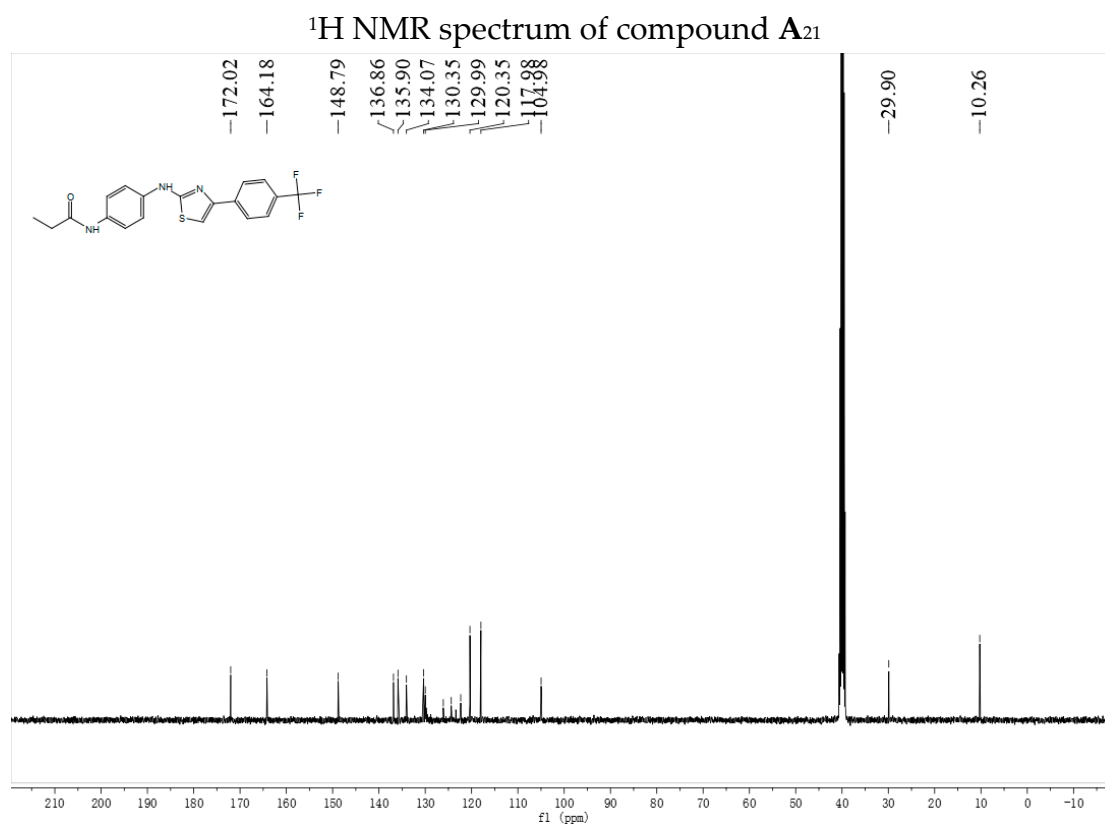

<sup>13</sup>C NMR spectrum of compound A<sub>21</sub>

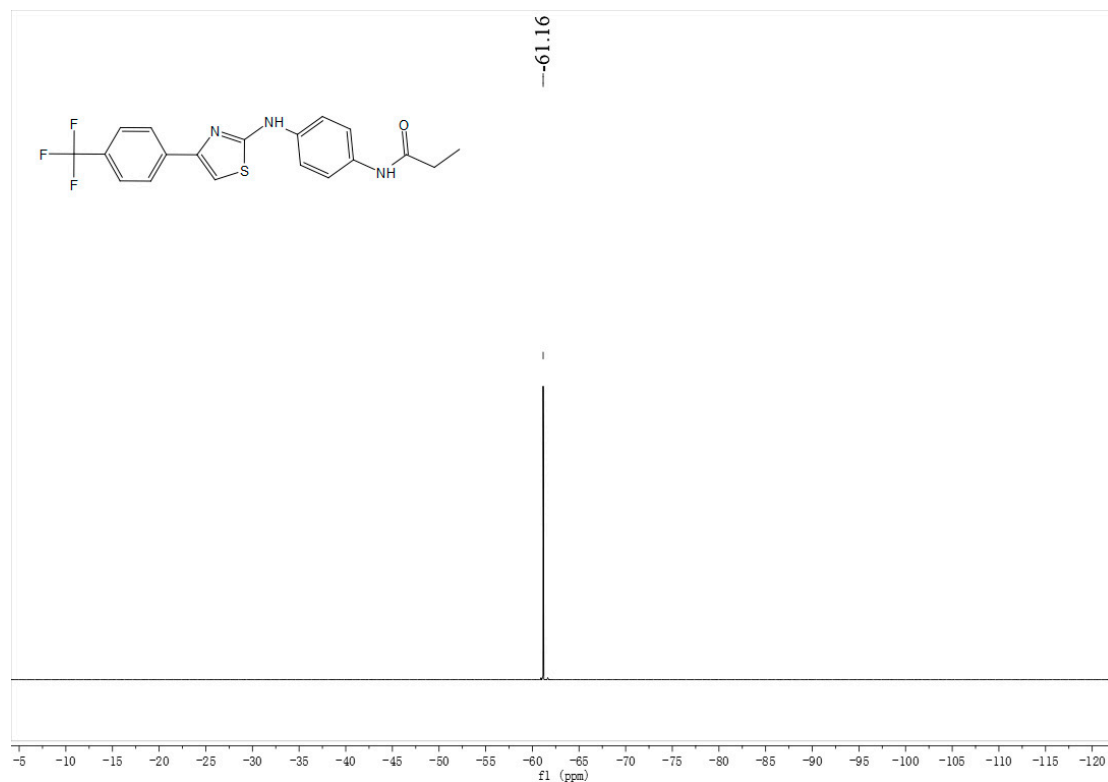 $^{19}\text{F}$  NMR spectrum of compound **A**<sub>21</sub>

2019091046 #49 F1: 0.47 AV: 1 NL: 1.8258  
T: FTMS+pESI Full ms [100.0000-1000.0000]

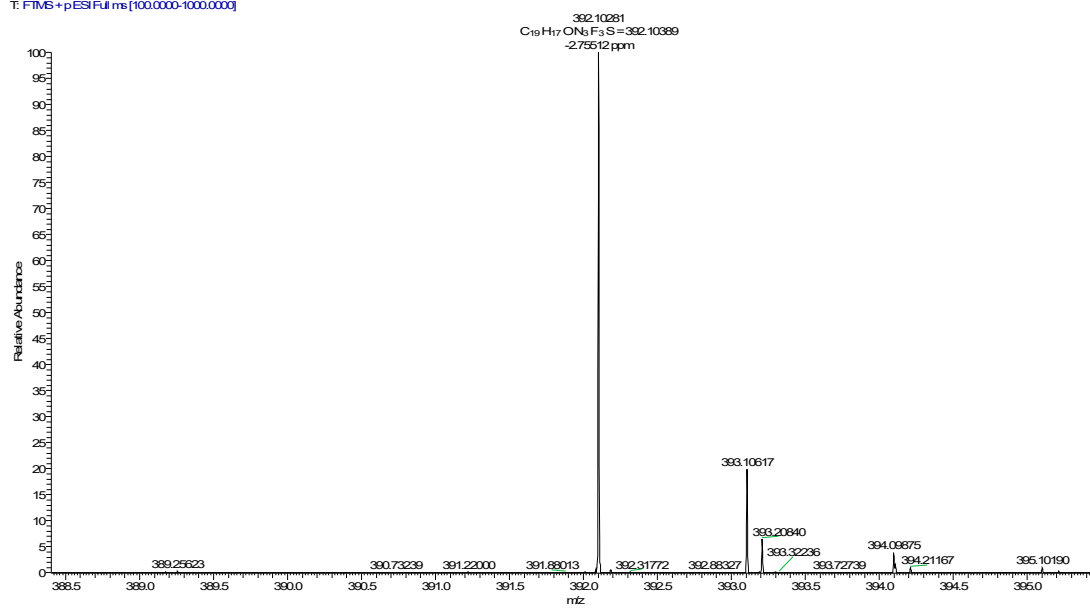HRMS(ESI) of compound **A**<sub>21</sub>

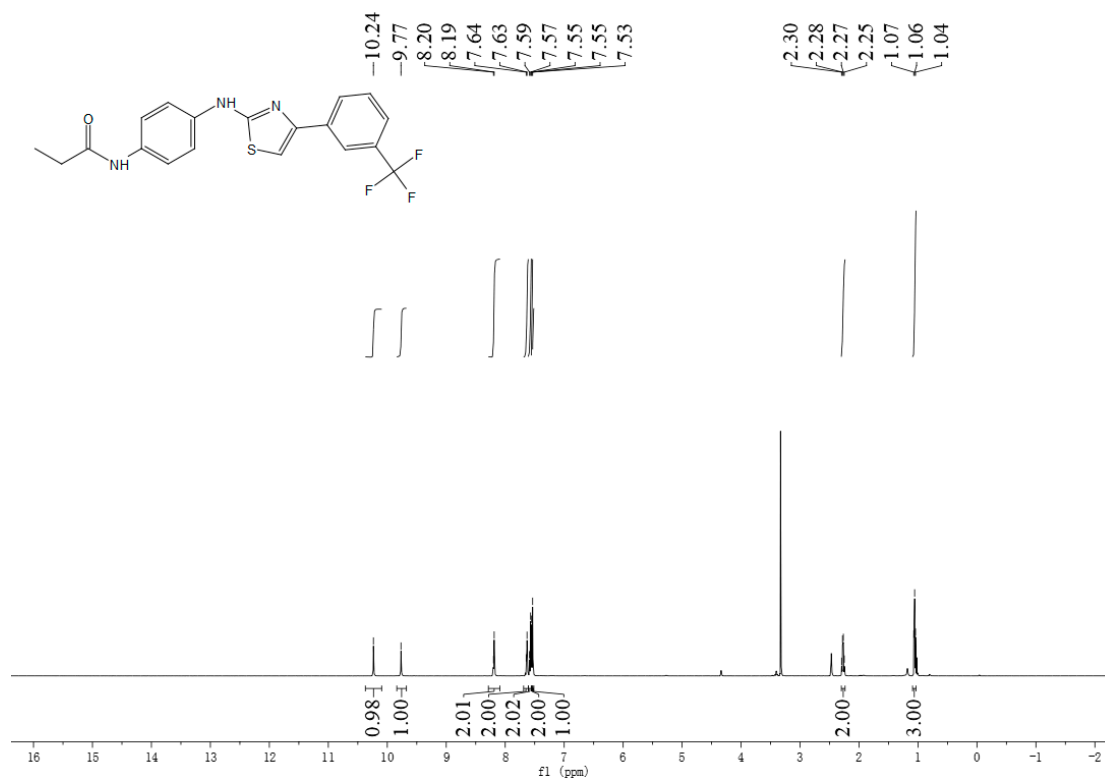**<sup>1</sup>H NMR spectrum of compound A<sub>22</sub>**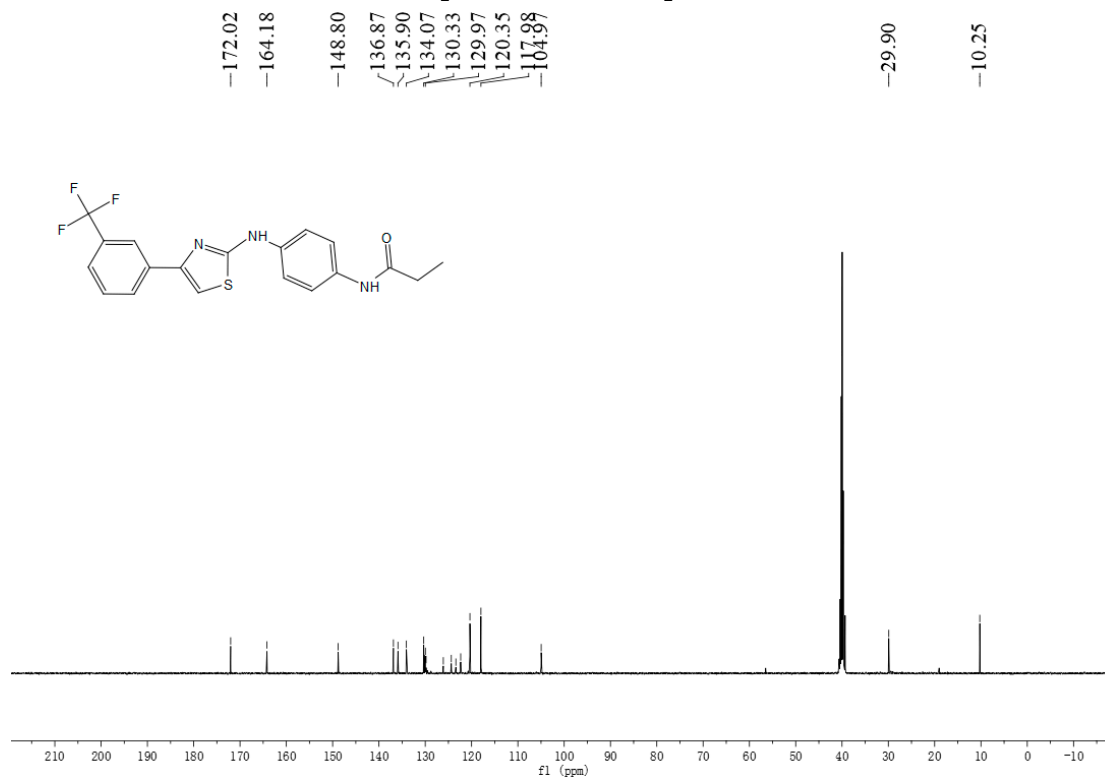**<sup>13</sup>C NMR spectrum of compound A<sub>22</sub>**

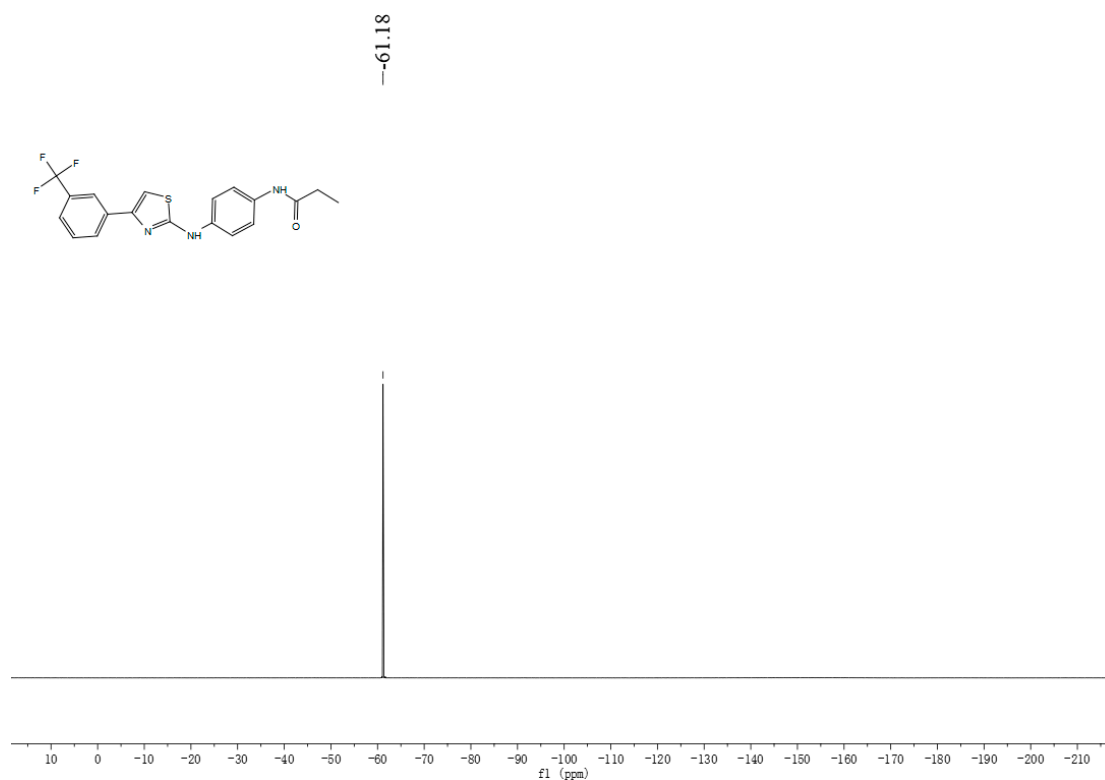

<sup>19</sup>F NMR spectrum of compound A<sub>22</sub>

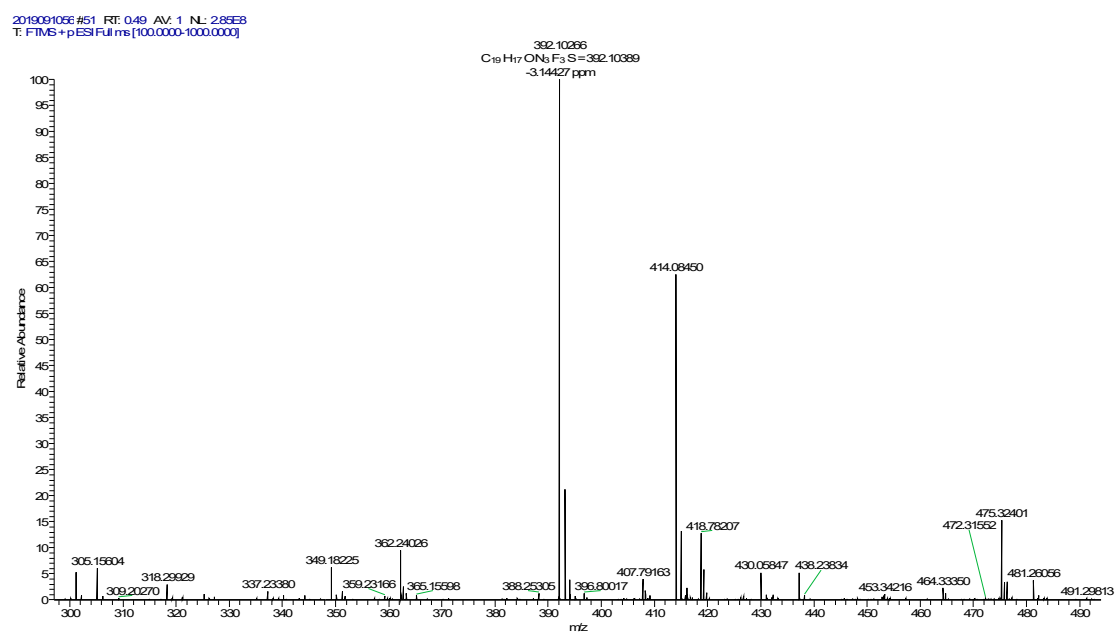

HRMS(ESI) of compound A<sub>22</sub>

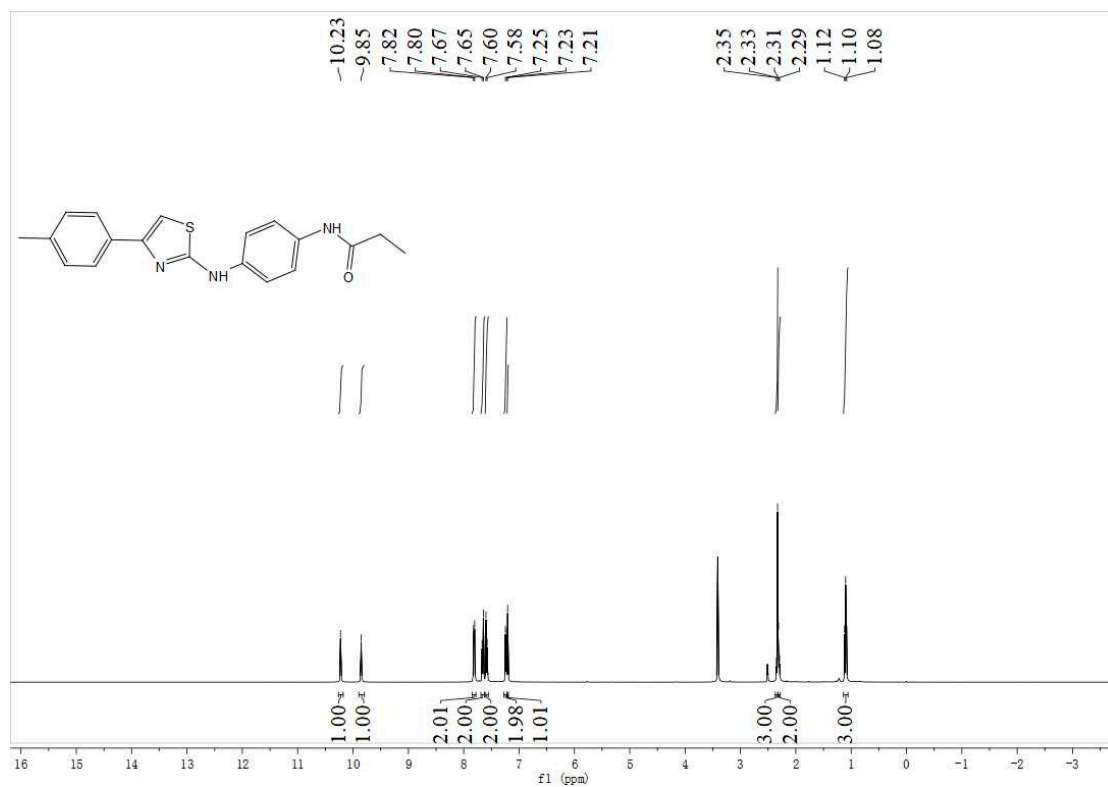

<sup>1</sup>H NMR spectrum of compound **A**<sub>23</sub>

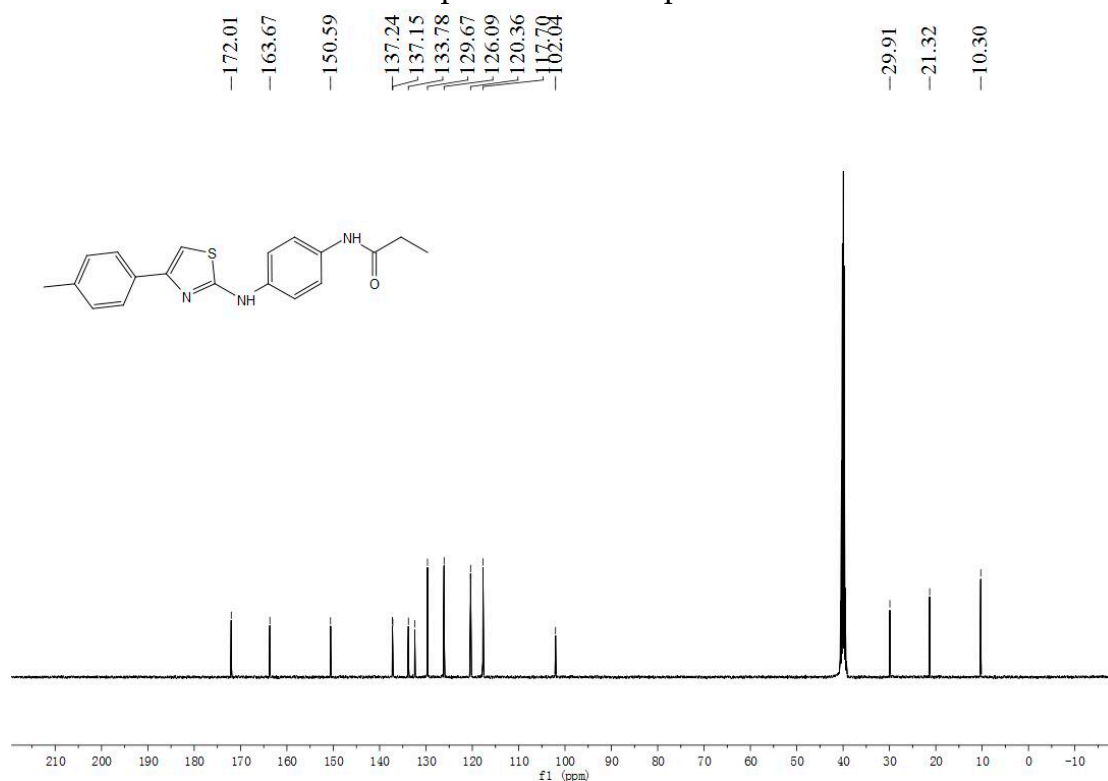

<sup>13</sup>C NMR spectrum of compound **A**<sub>23</sub>



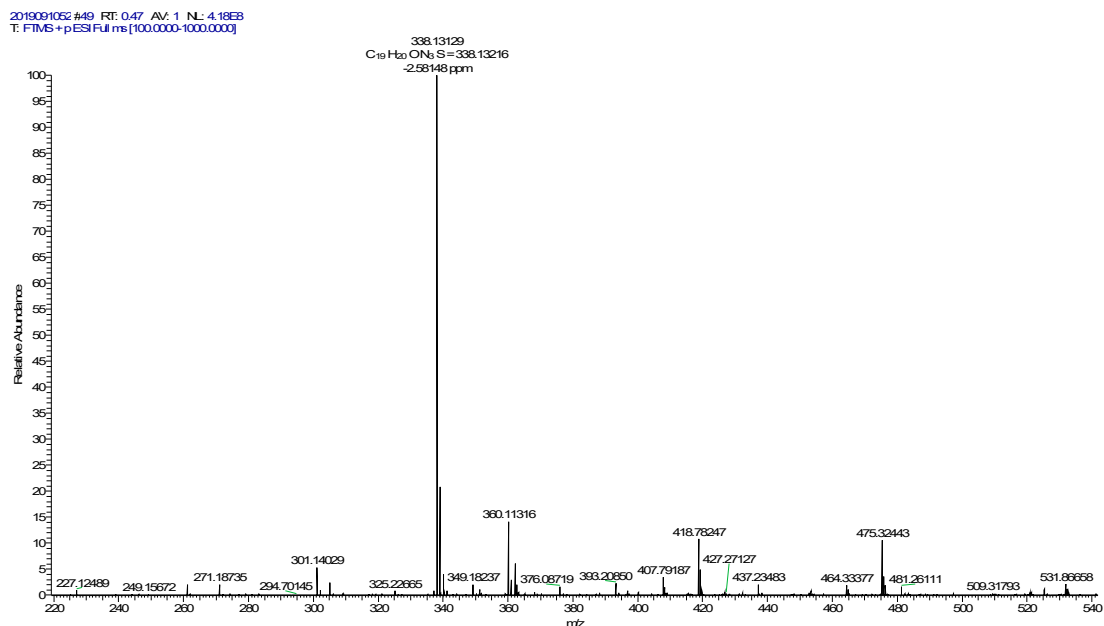HRMS(ESI) of compound **A23**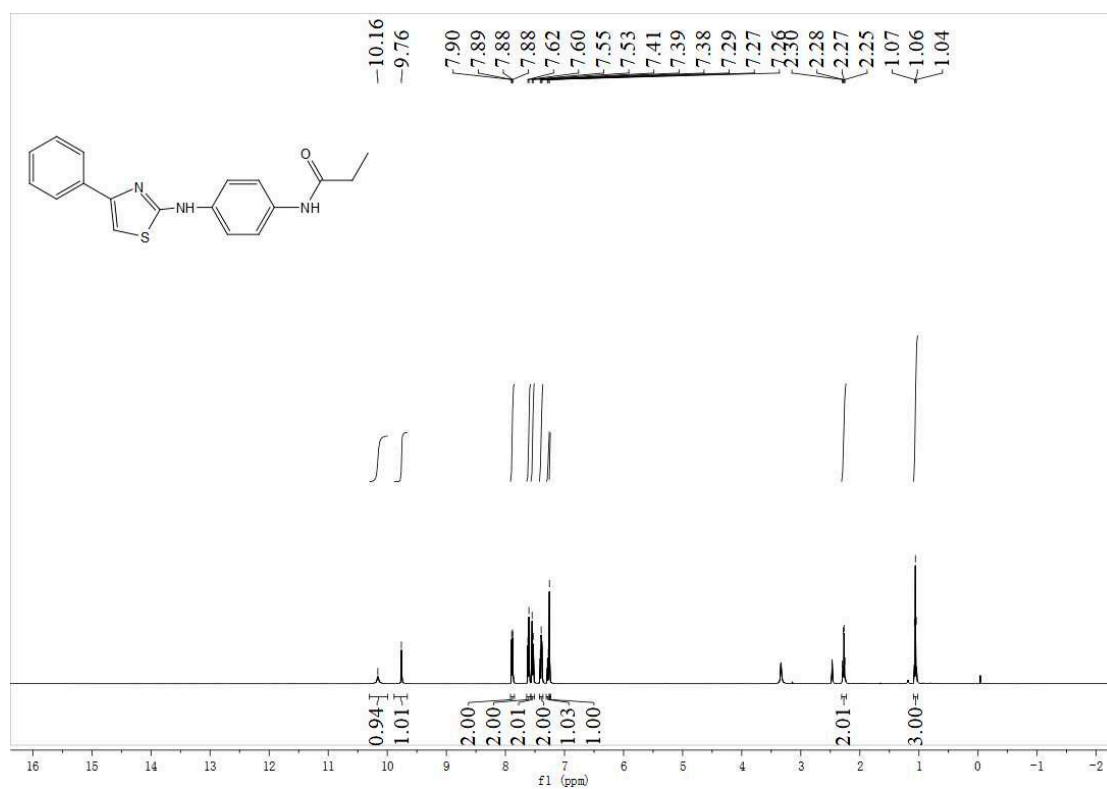<sup>1</sup>H NMR spectrum of compound **A24**

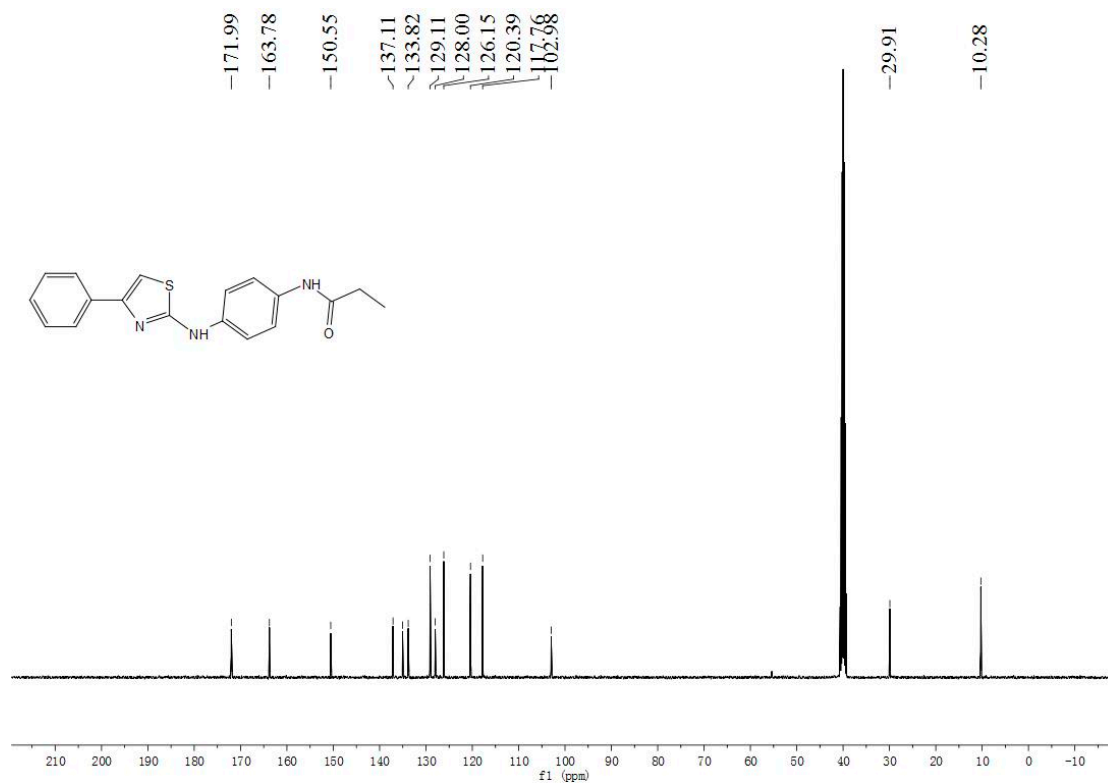<sup>13</sup>C NMR spectrum of compound A<sub>24</sub>

2019091047 #49 FID: 0.47 AV: 1 NL: 1.15E9  
T: FTMS+pESI Full ms [100.0000-1000.0000]

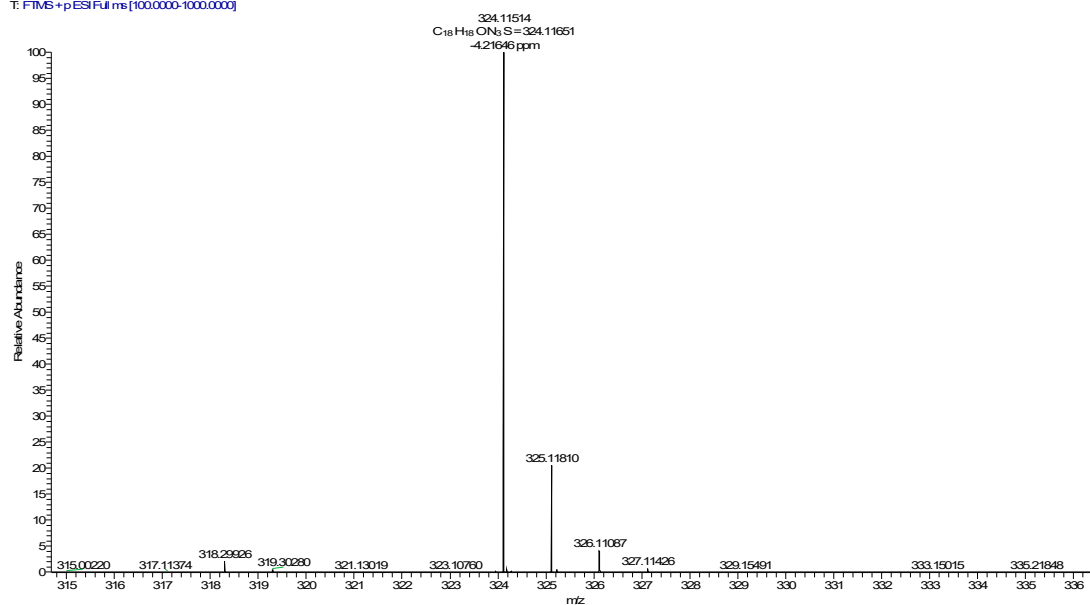HRMS(ESI) of compound A<sub>24</sub>

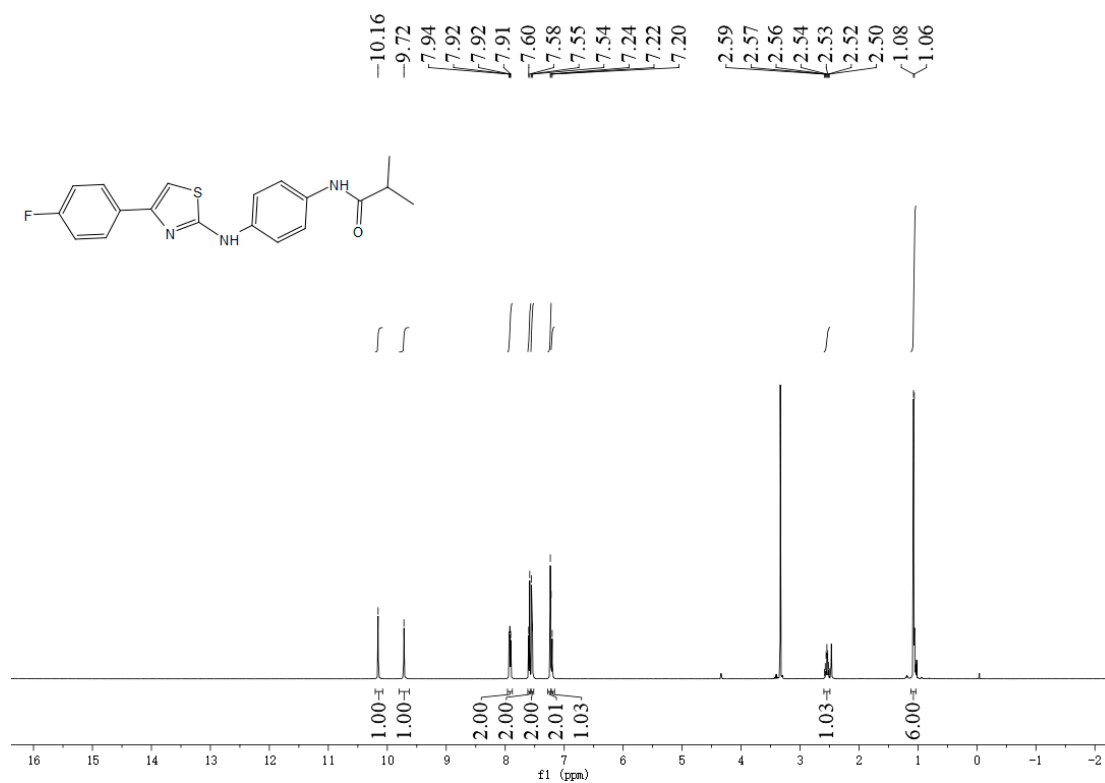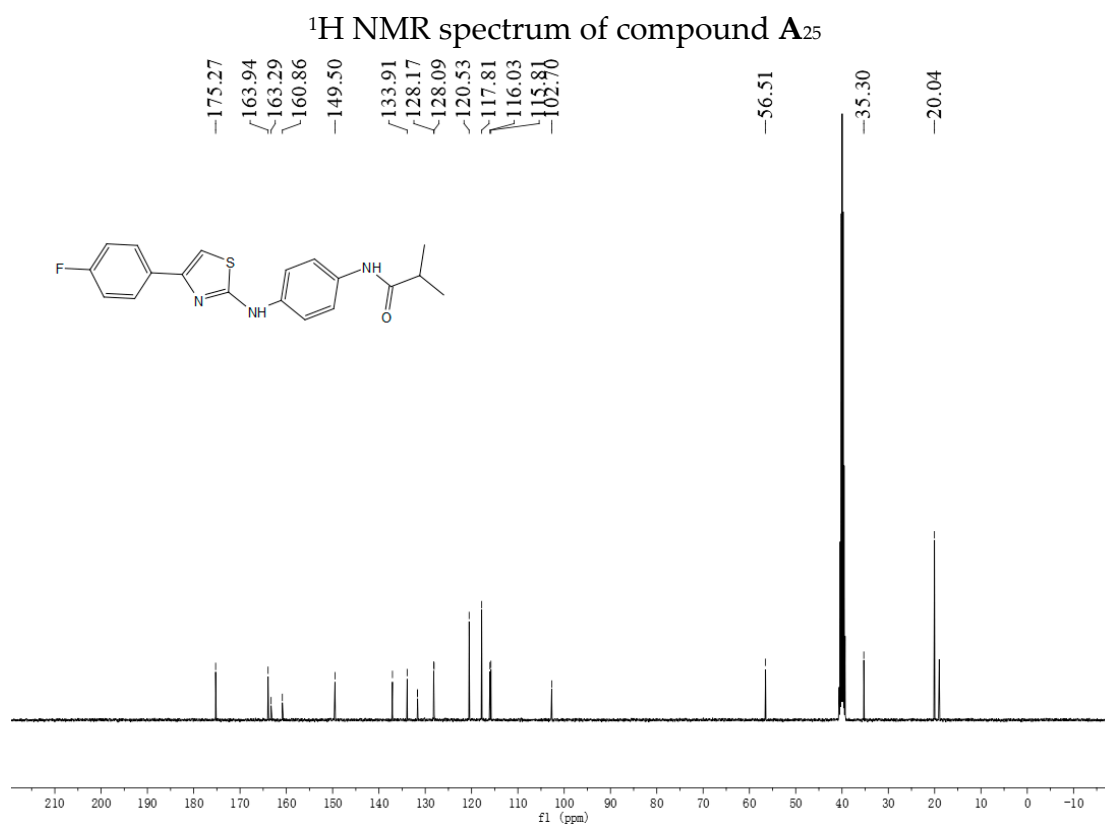

**<sup>13</sup>C NMR spectrum of compound A<sub>25</sub>**  
 (δ 56 (CH<sub>2</sub>), δ 19 (CH<sub>3</sub>) in <sup>13</sup>C NMR spectrum of compound A<sub>25</sub> indicating a signal of impurity CH<sub>3</sub>CH<sub>2</sub>OH which should have been wiped out)

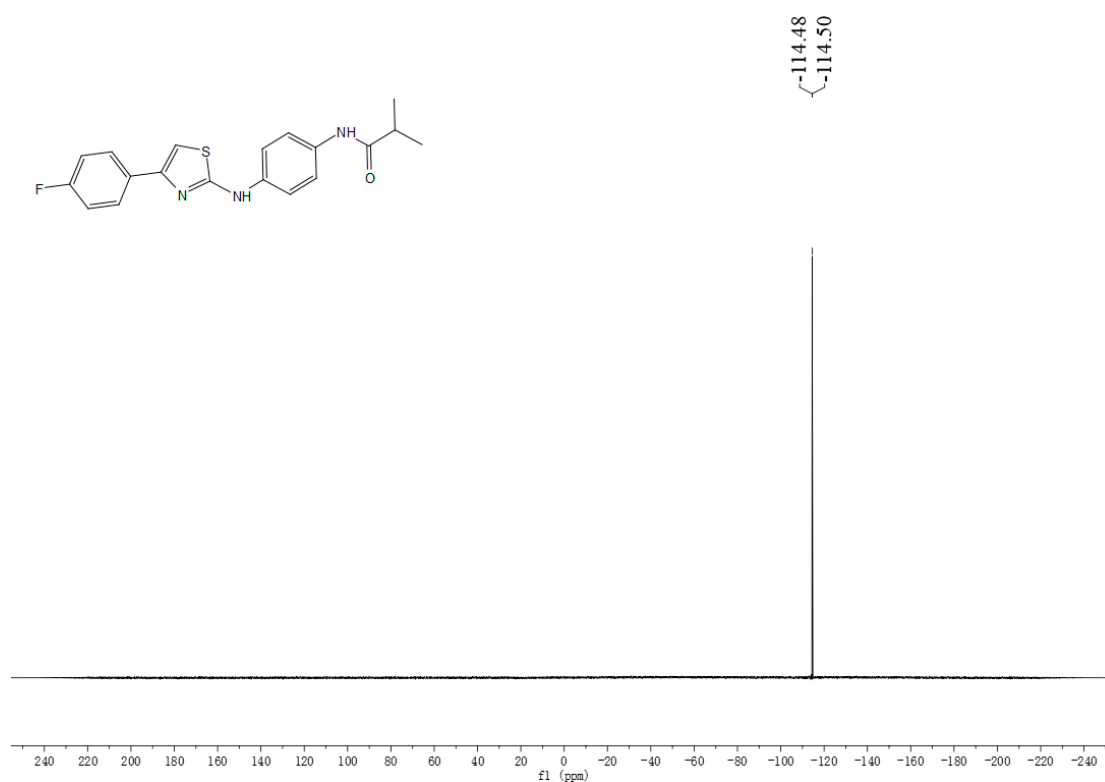<sup>19</sup>F NMR spectrum of compound A<sub>25</sub>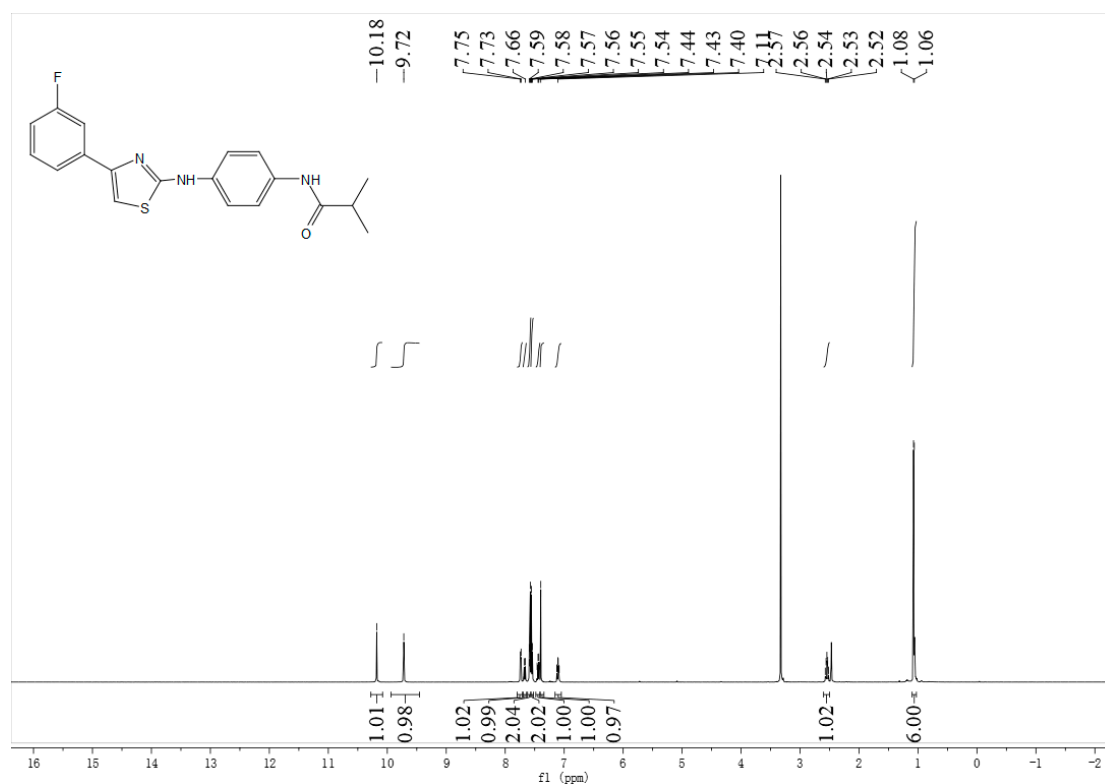<sup>1</sup>H NMR spectrum of compound A<sub>26</sub>

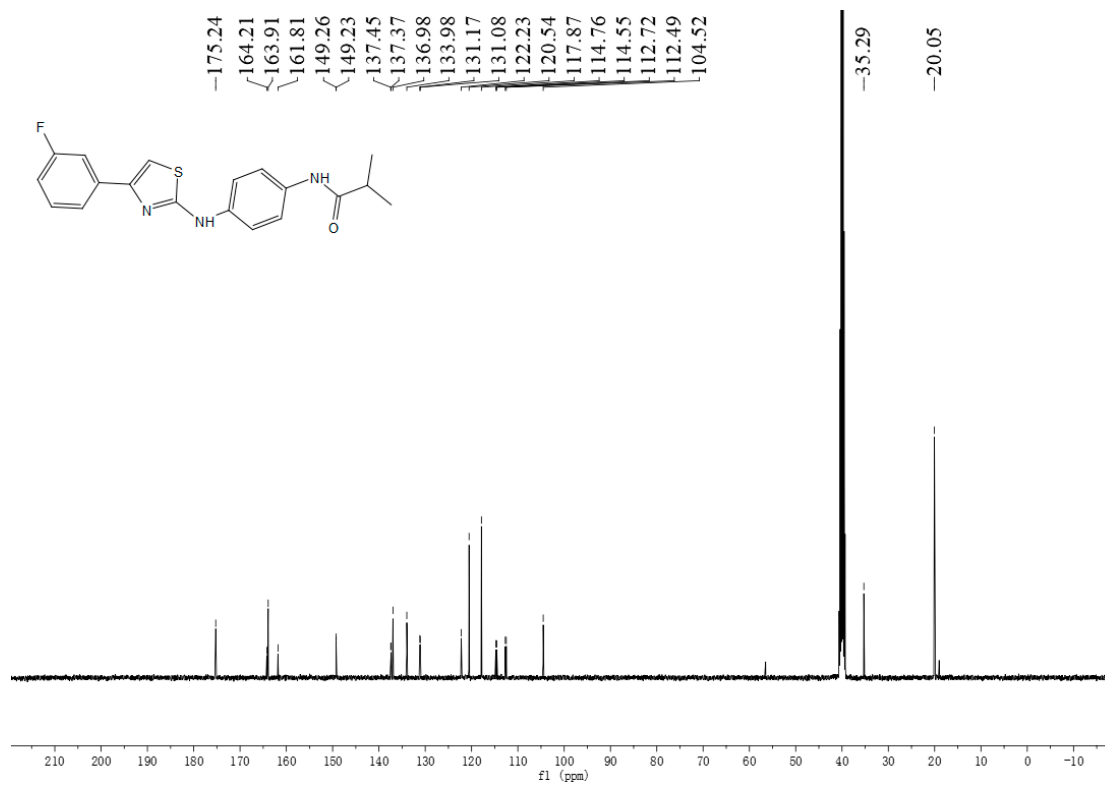

<sup>13</sup>C NMR spectrum of compound **A<sub>26</sub>**

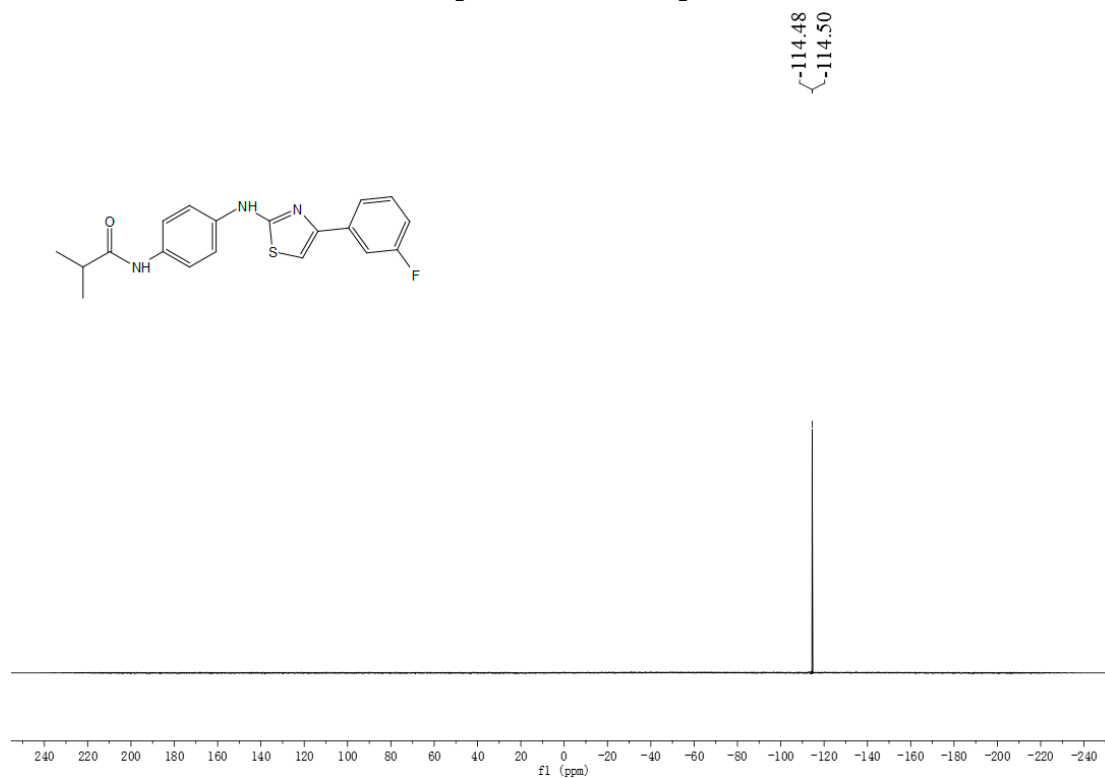

<sup>19</sup>F NMR spectrum of compound **A<sub>26</sub>**

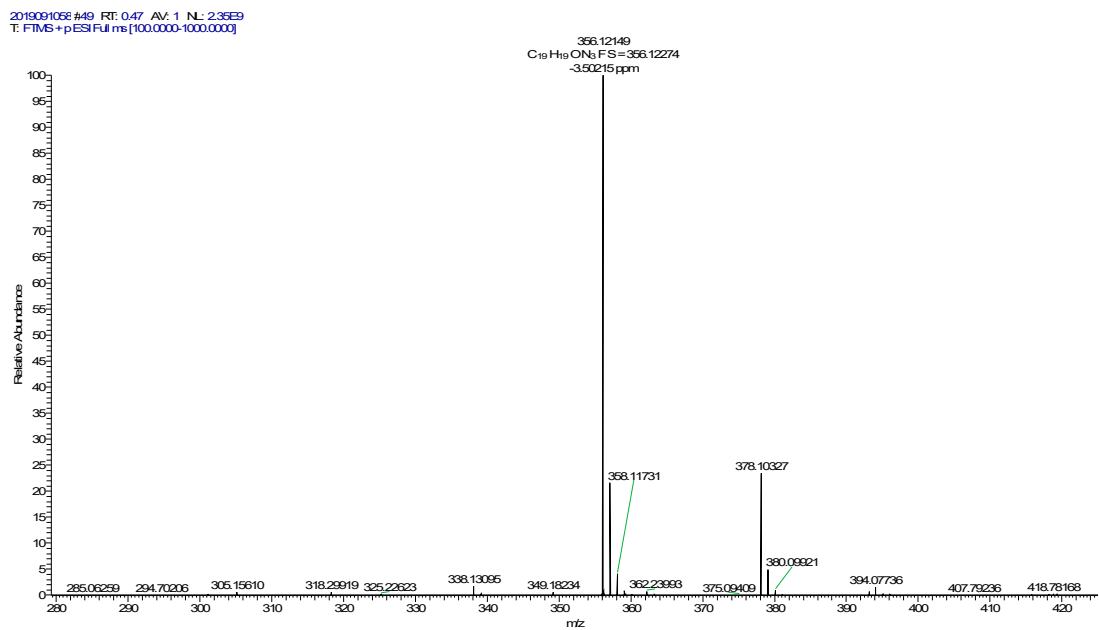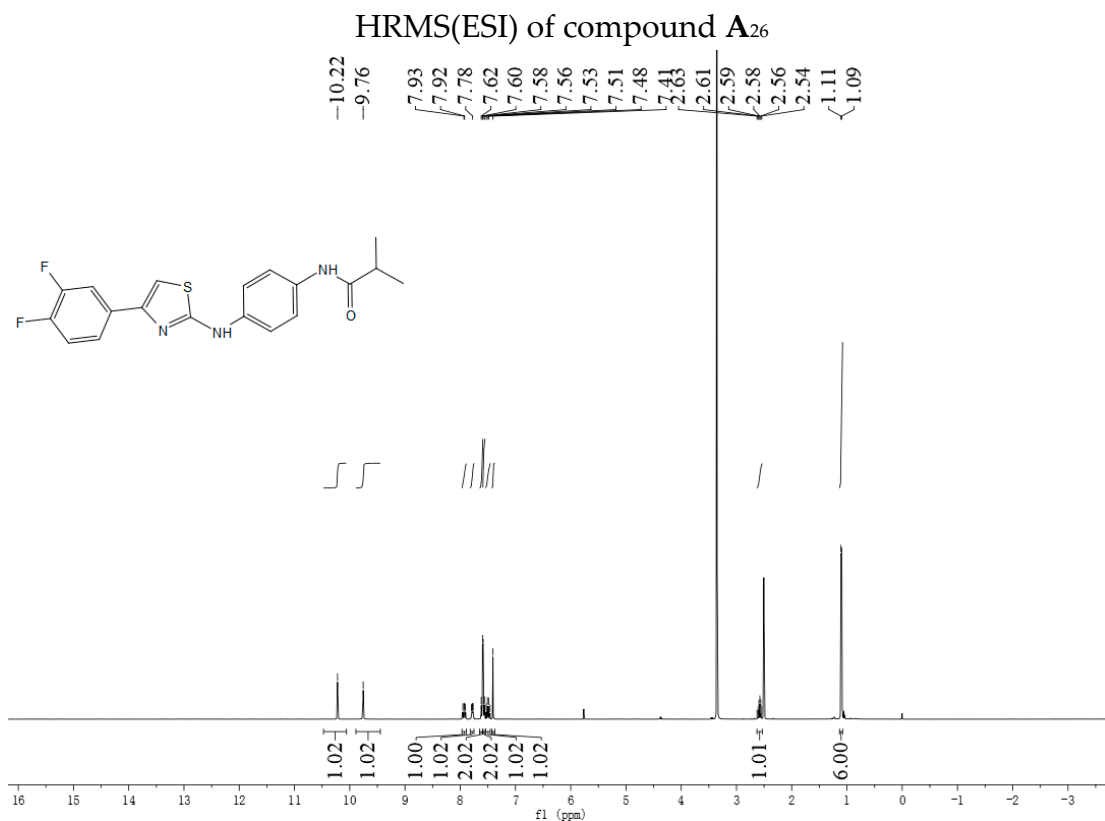

**<sup>1</sup>H NMR spectrum of compound **A<sub>27</sub>****

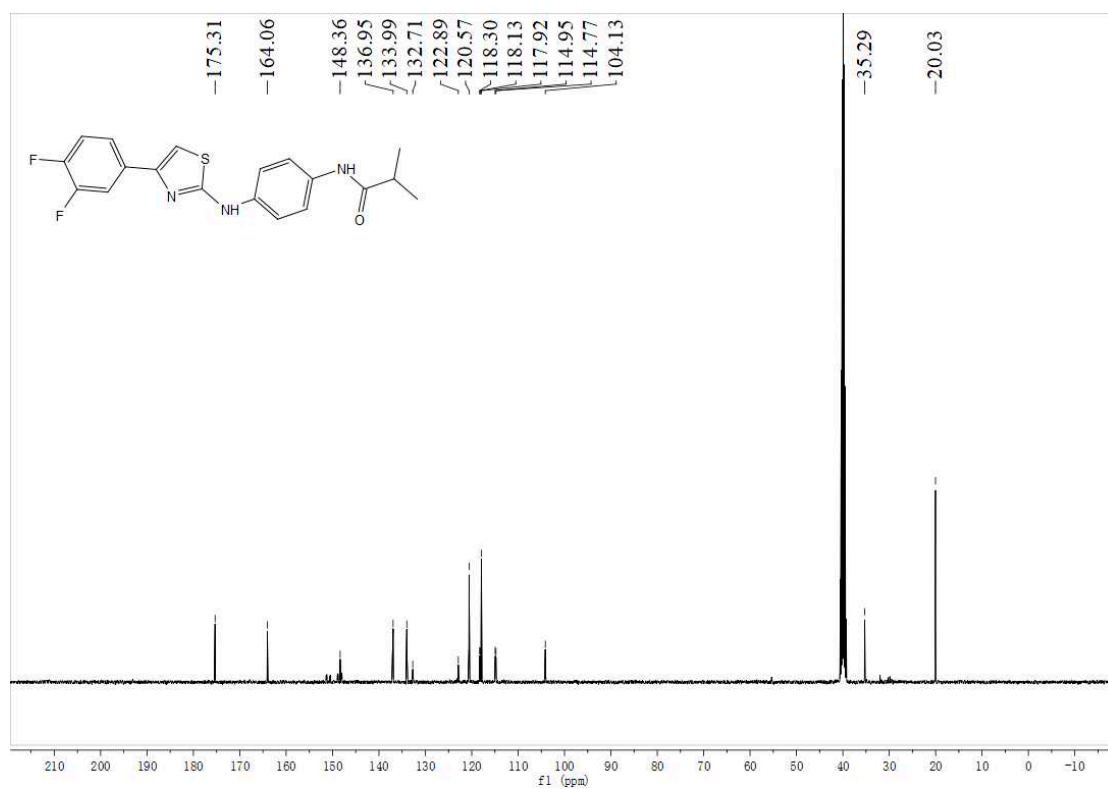

<sup>13</sup>C NMR spectrum of compound **A<sub>27</sub>**

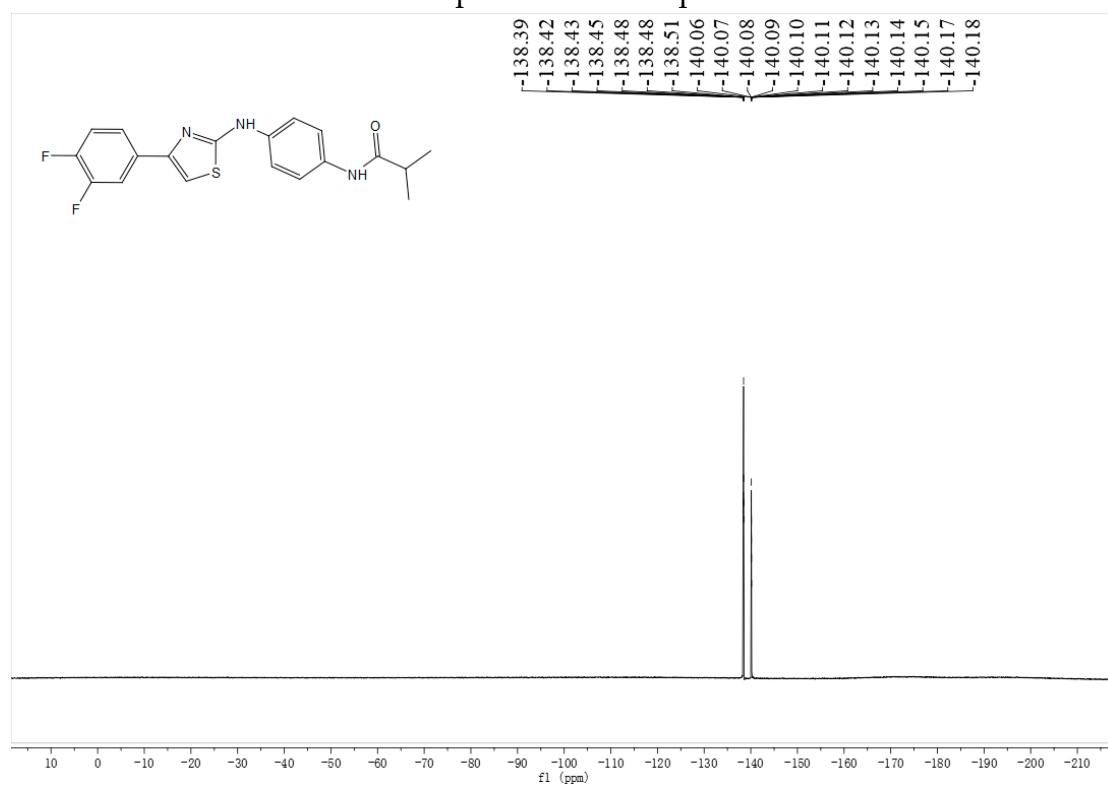

<sup>19</sup>F NMR spectrum of compound **A<sub>27</sub>**

2019091065 #51 RT: 0.49 AV: 1 NL: 6.58E3  
T: FTMS +pESI Full ms [100.0000-1000.0000]

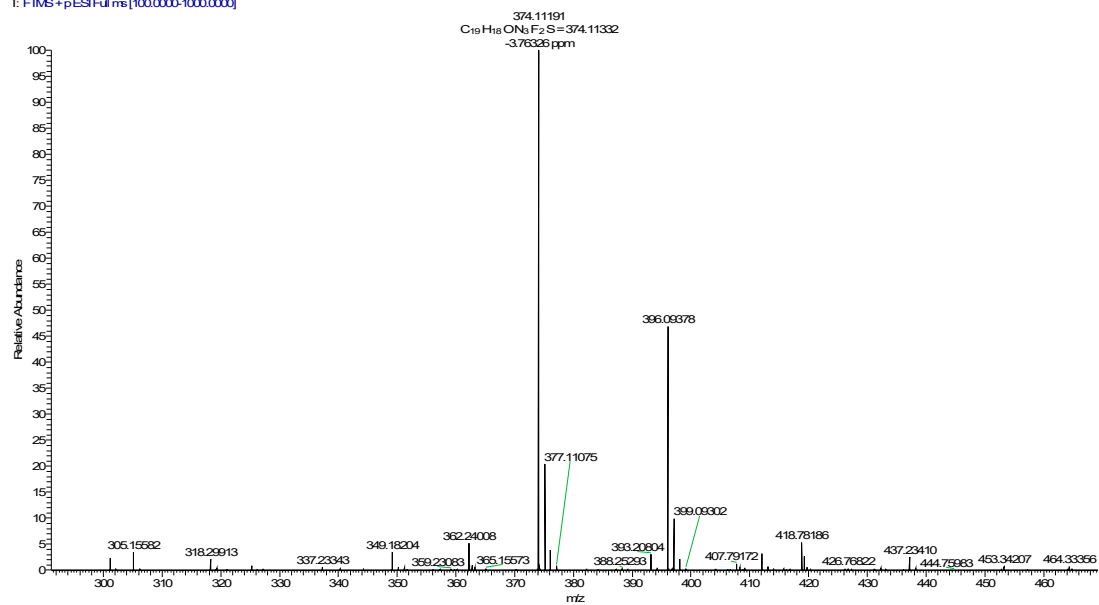

HRMS(ESI) of compound A<sub>27</sub>

10.39, 9.90, 7.95, 7.93, 7.66, 7.63, 7.61, 7.58, 7.49, 7.47, 7.36, 2.64, 2.62, 2.61, 2.59, 2.57, 2.55, 1.11, 1.09

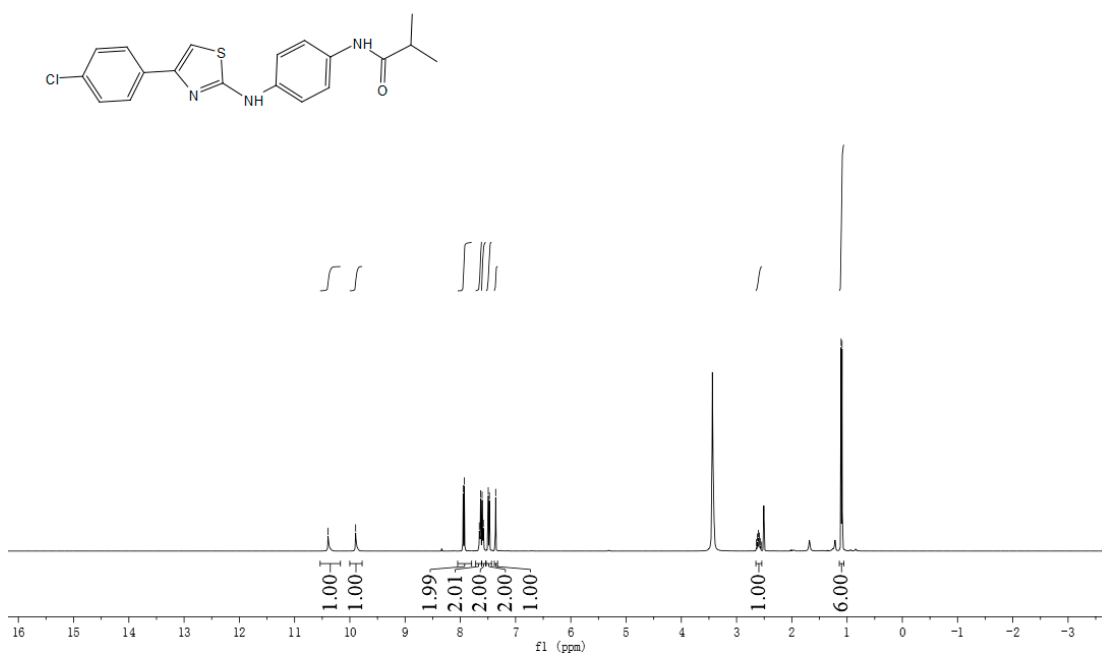

<sup>1</sup>H NMR spectrum of compound A<sub>28</sub>



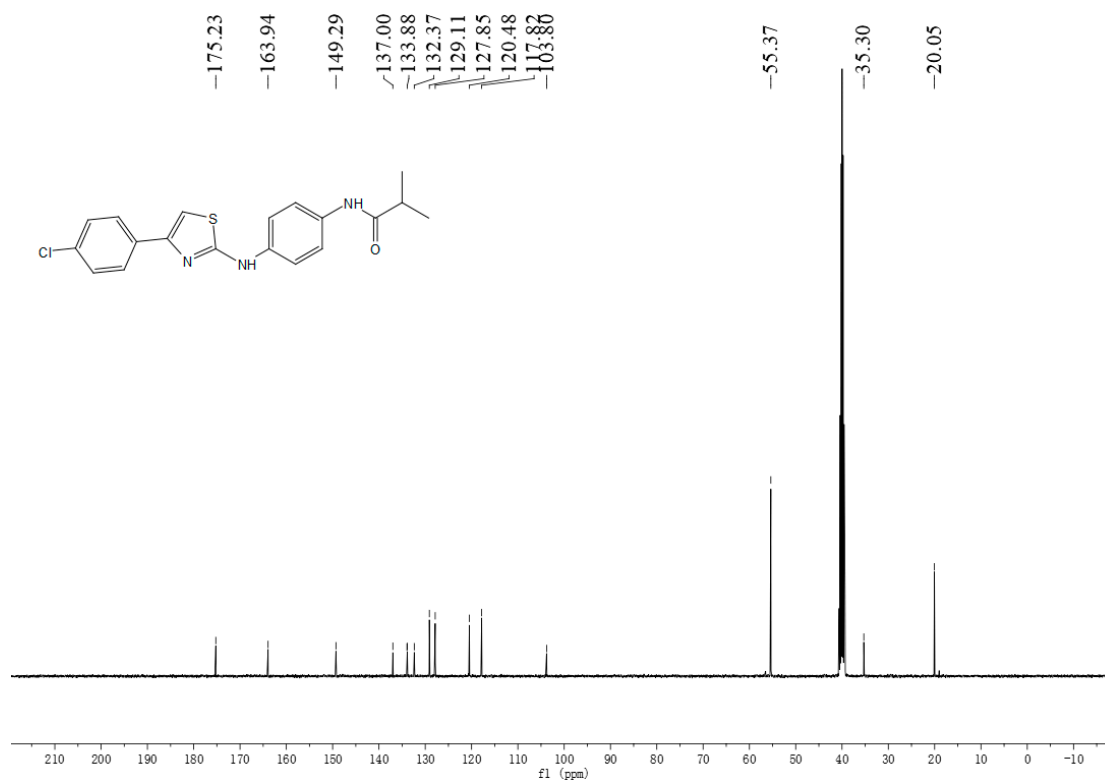<sup>13</sup>C NMR spectrum of compound **A**<sub>28</sub>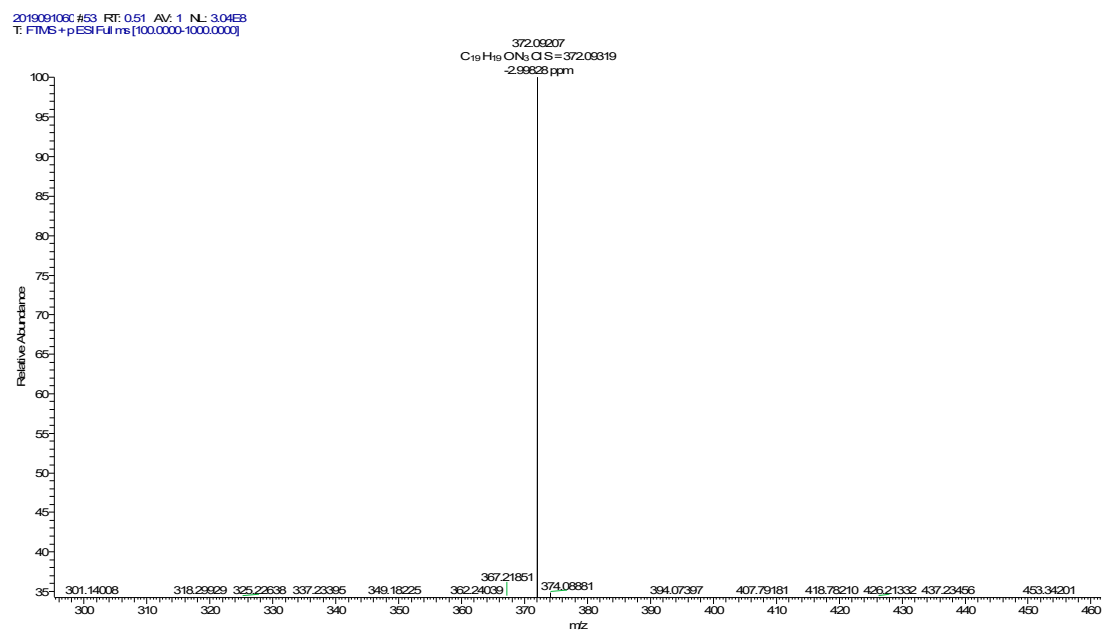HRMS(ESI) of compound **A**<sub>28</sub>

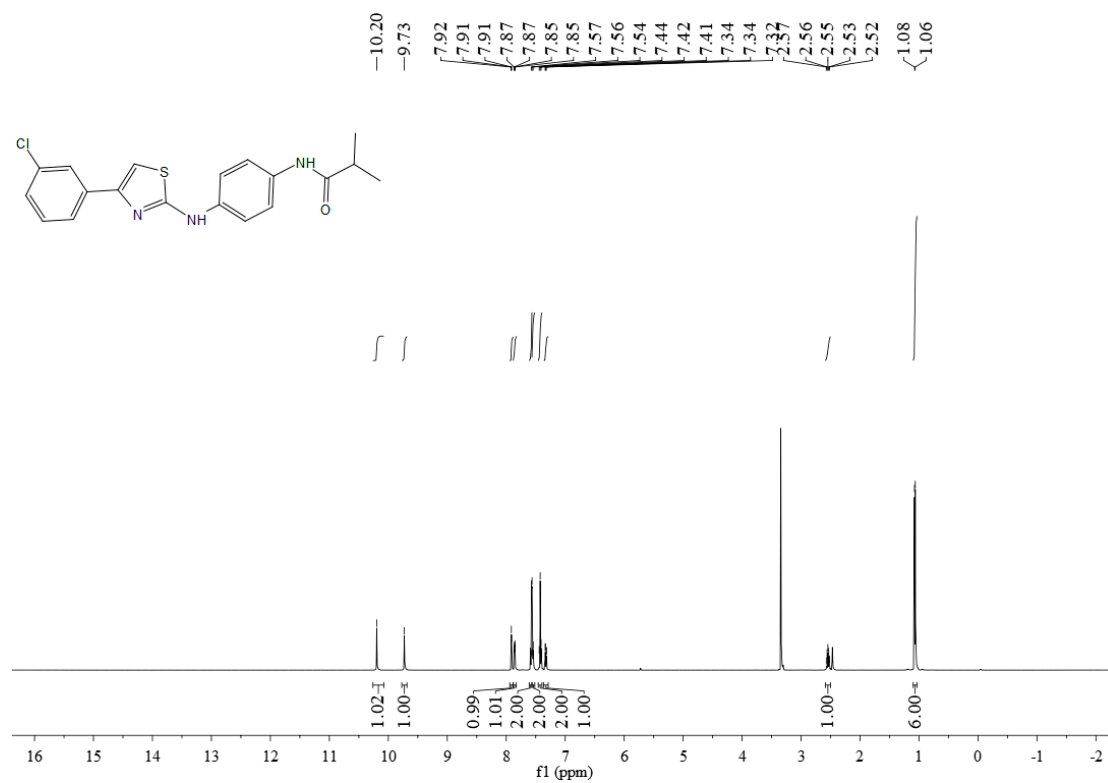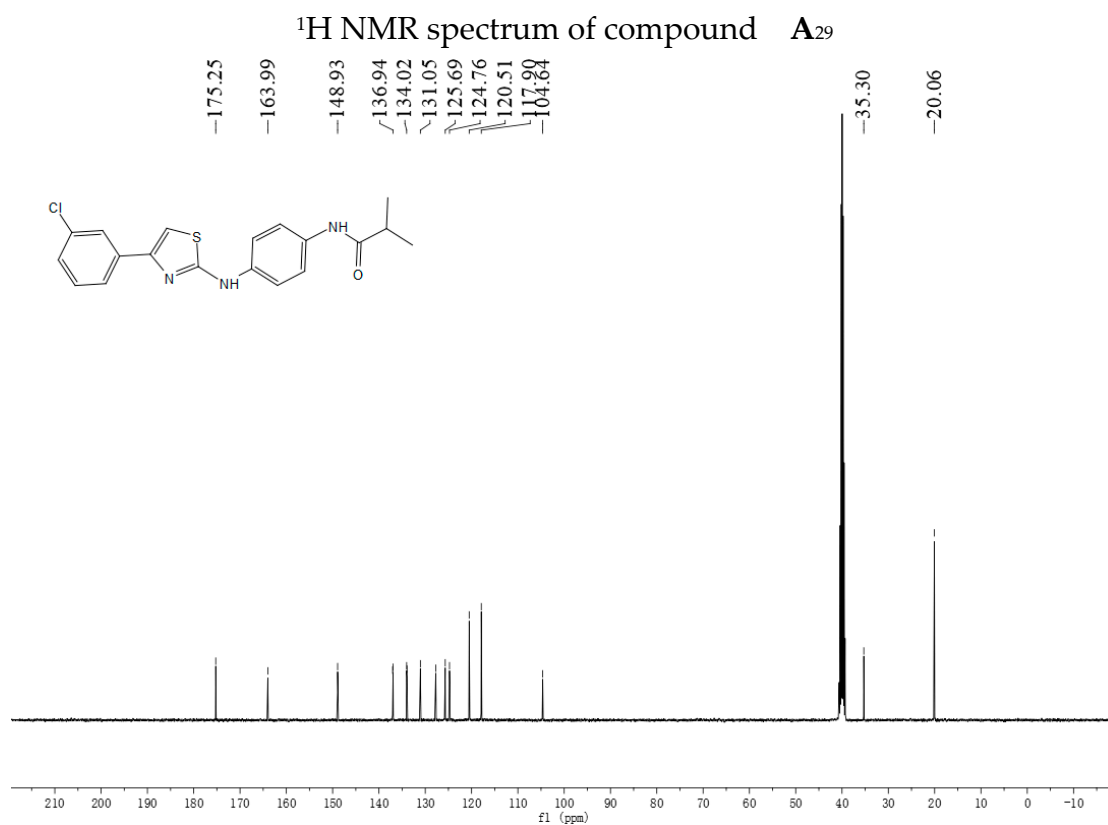

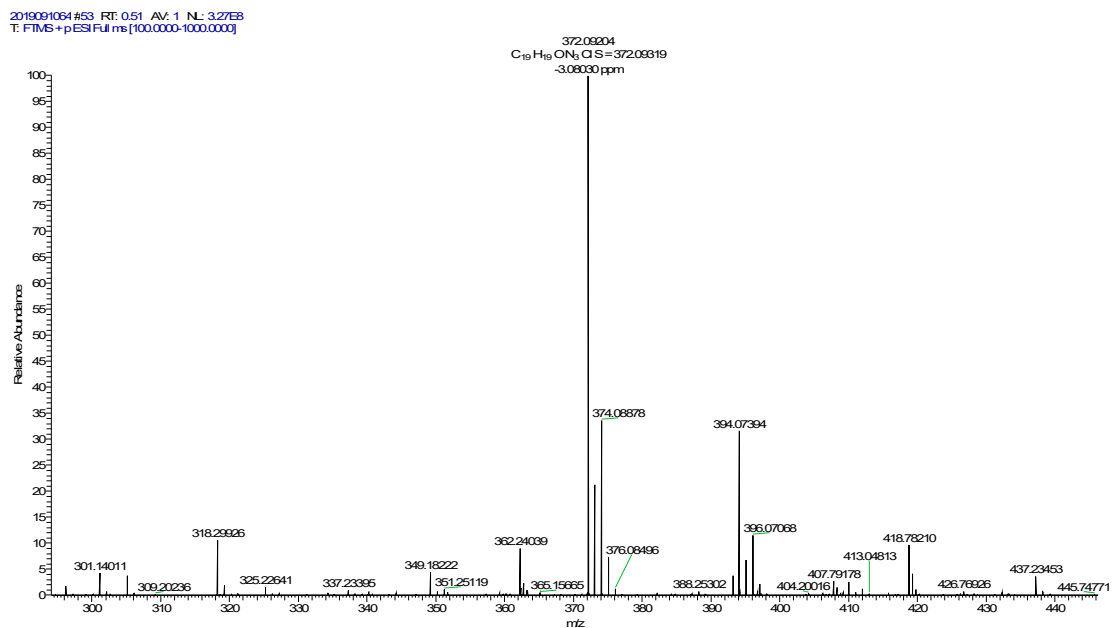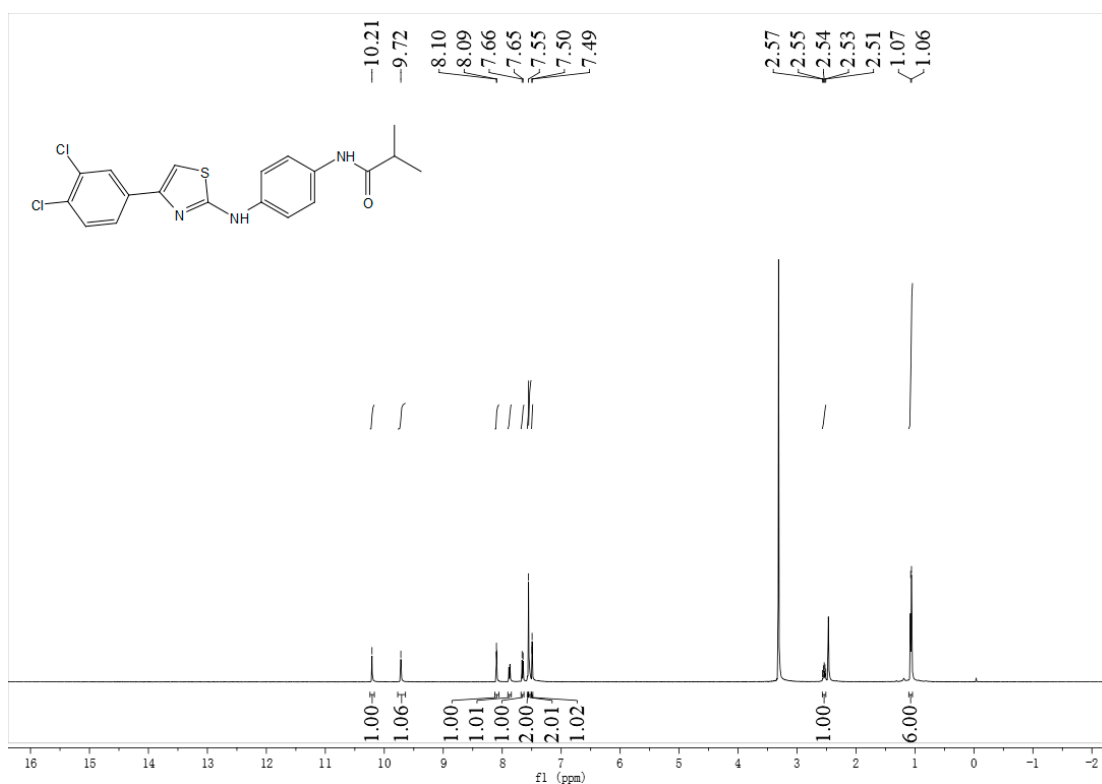

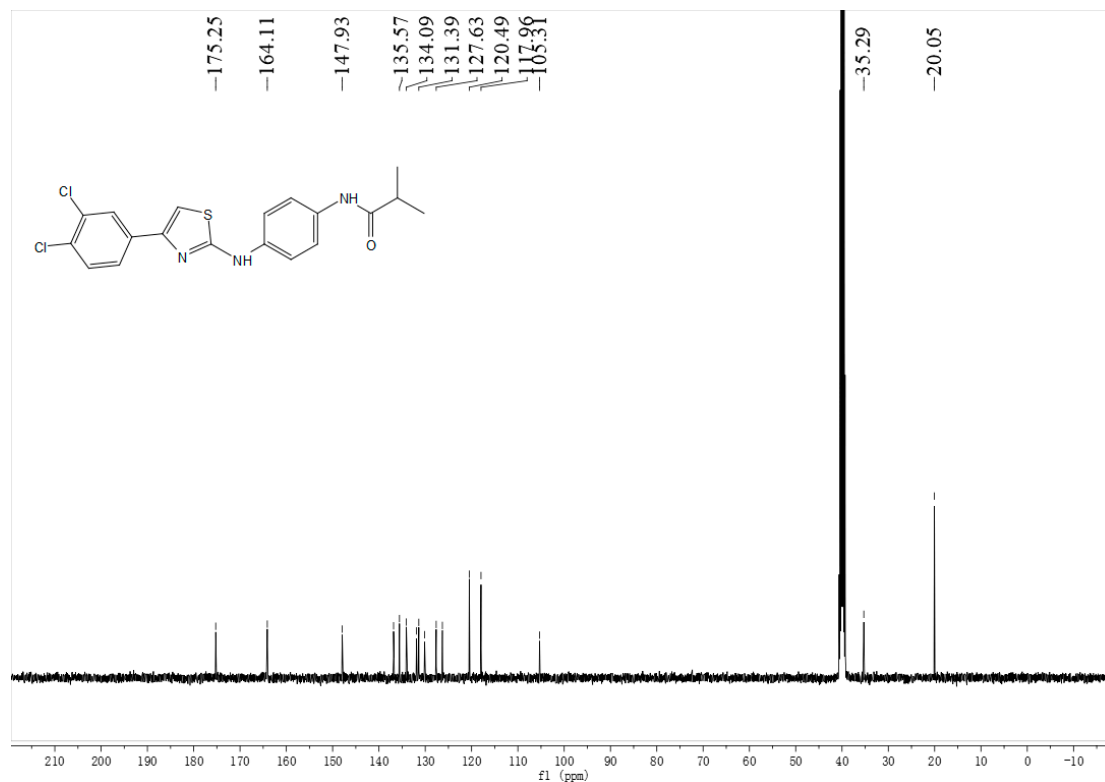

<sup>13</sup>C NMR spectrum of compound A<sub>30</sub>

2019091062 #59 RT: 0.57 AM: 1 NL: 7.07E7  
T: FTMS+pESI Full ms [100.0000-1000.0000]

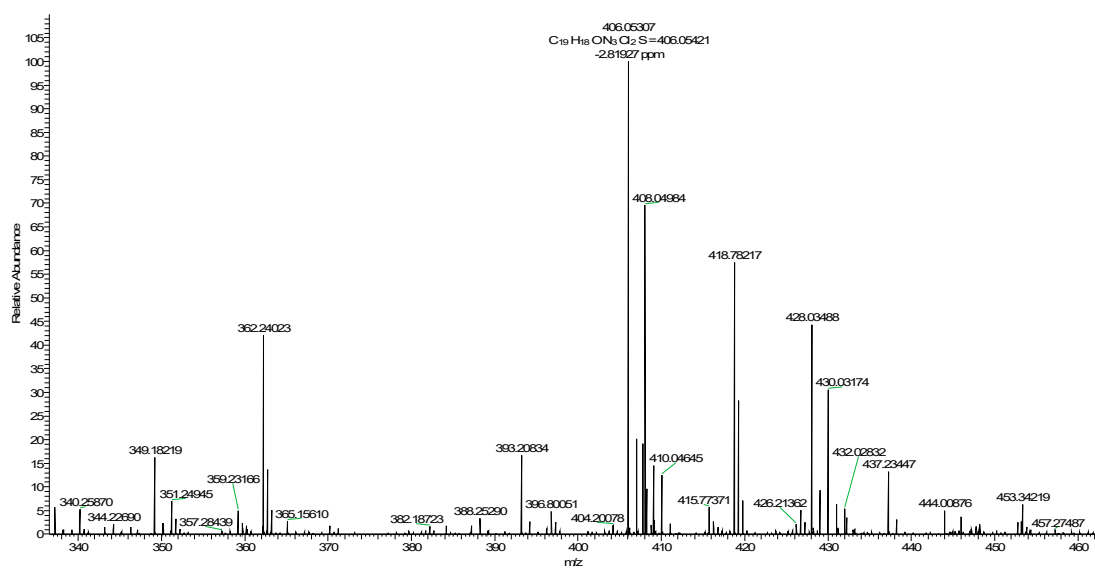

HRMS(ESI) of compound A<sub>30</sub>

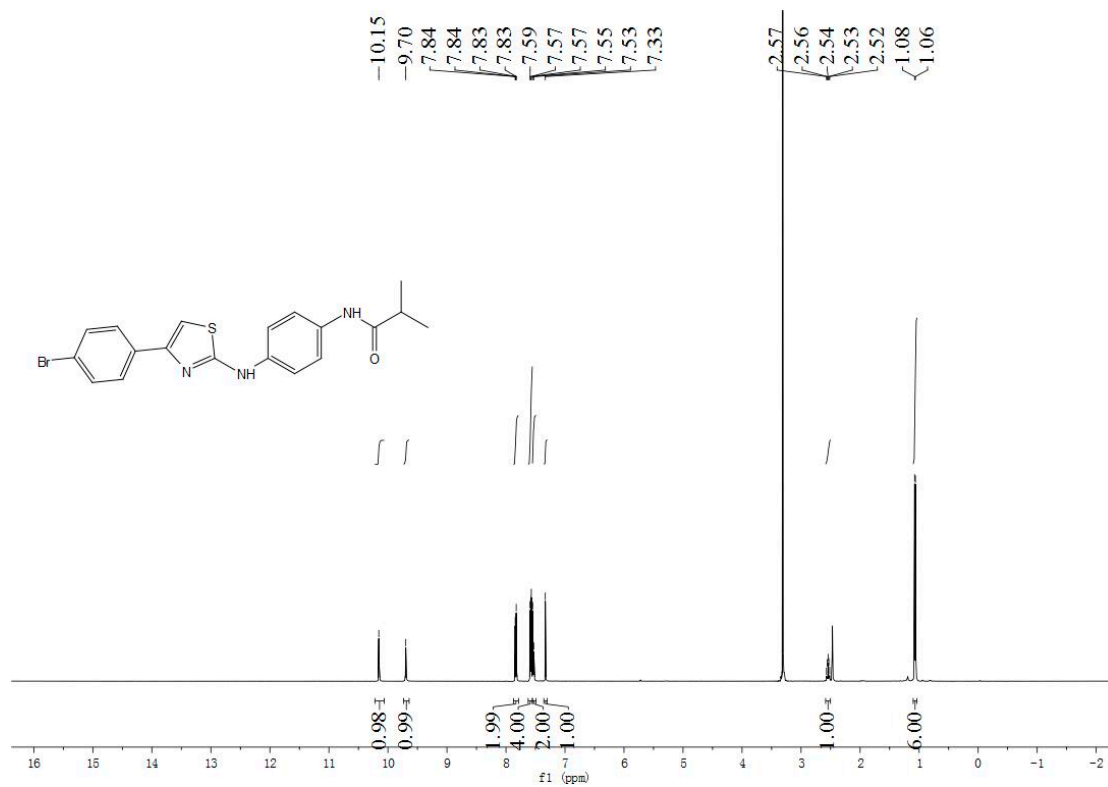

<sup>1</sup>H NMR spectrum of compound A<sub>31</sub>

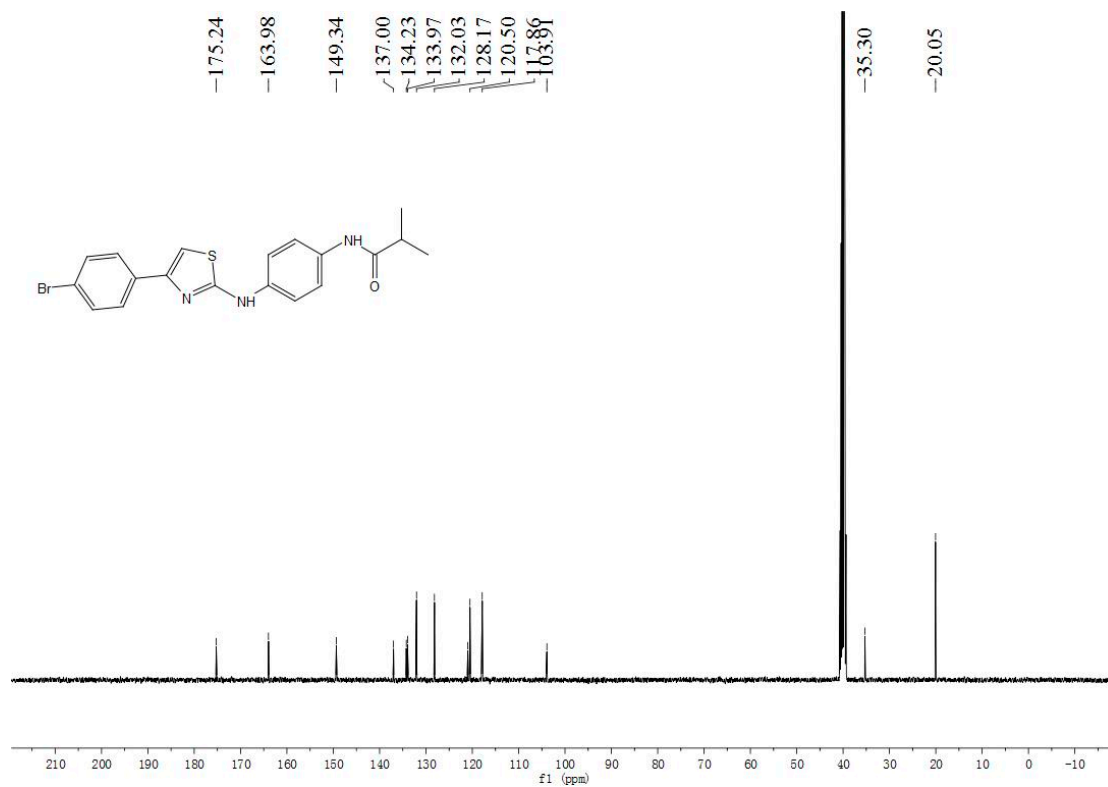

<sup>13</sup>C NMR spectrum of compound A<sub>31</sub>

2019091066 #53 RT: 0.51 AV: 1 NL: 7.65E7  
T: FTMS + pESI Full ms [100.0000-1000.0000]

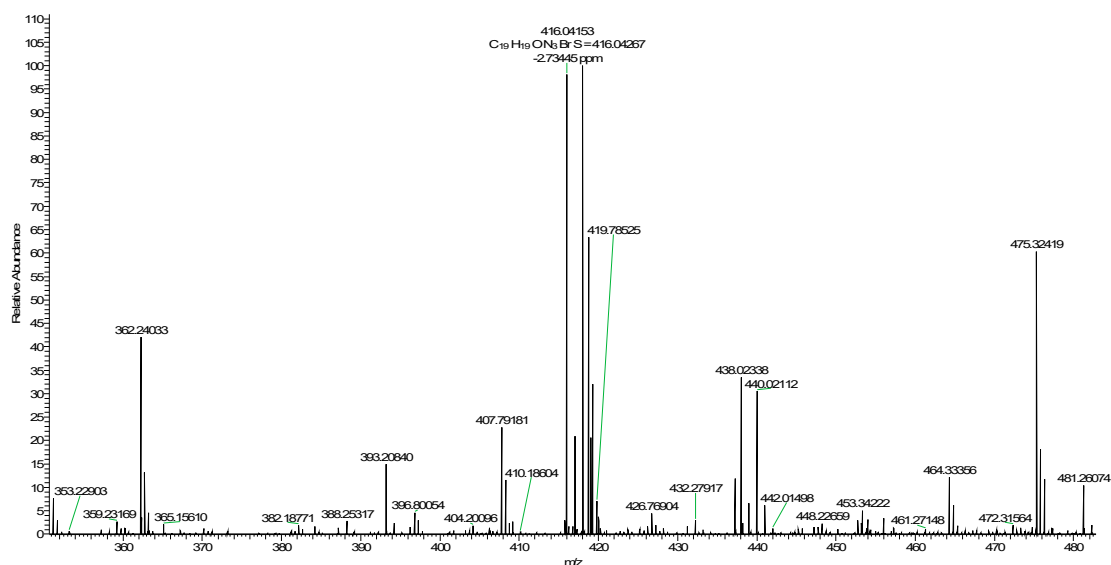

HRMS(ESI) of compound A<sub>31</sub>

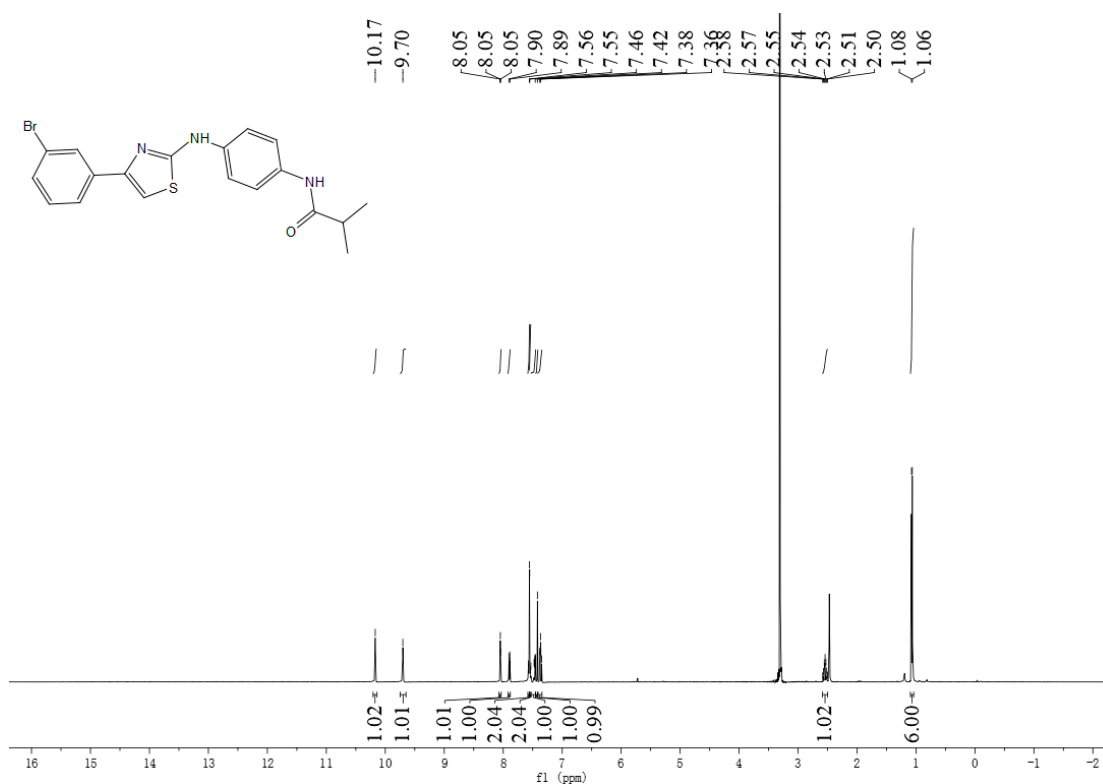

<sup>1</sup>H NMR spectrum of compound A<sub>32</sub>

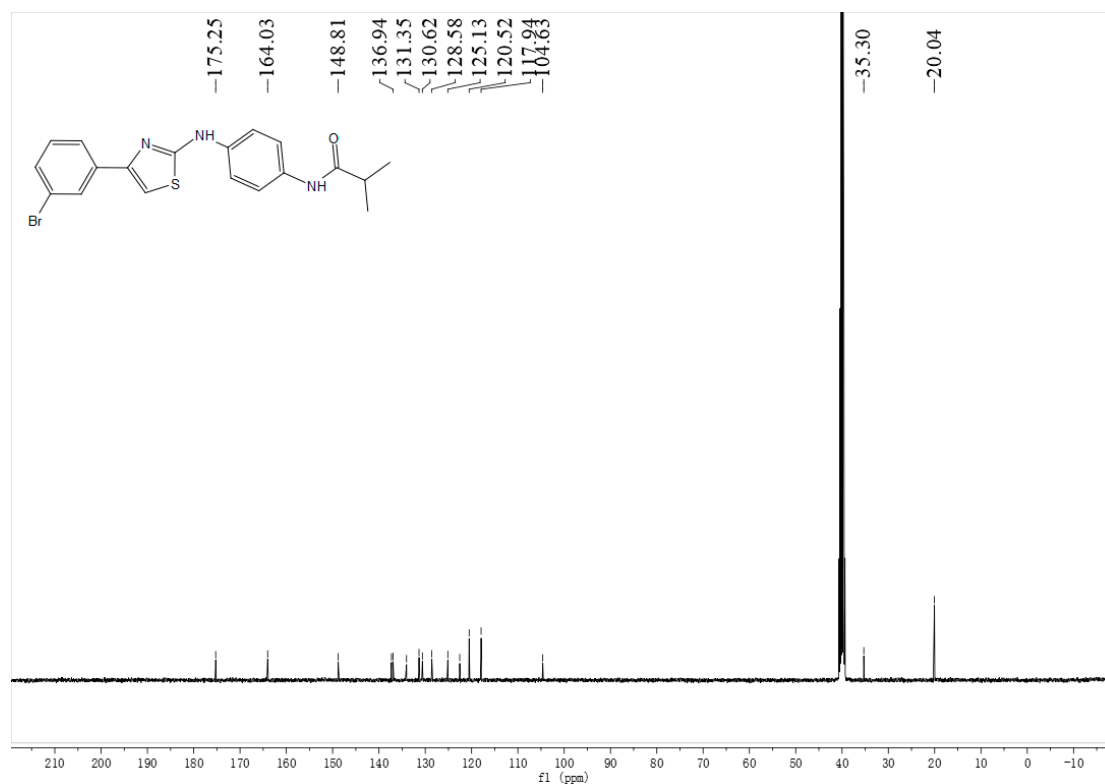

<sup>13</sup>C NMR spectrum of compound A<sub>32</sub>

2019091067 #57 RT: 0.55 AM: 1.66EB  
T: FTMS+pESI Full ms [100.0000-1000.0000]

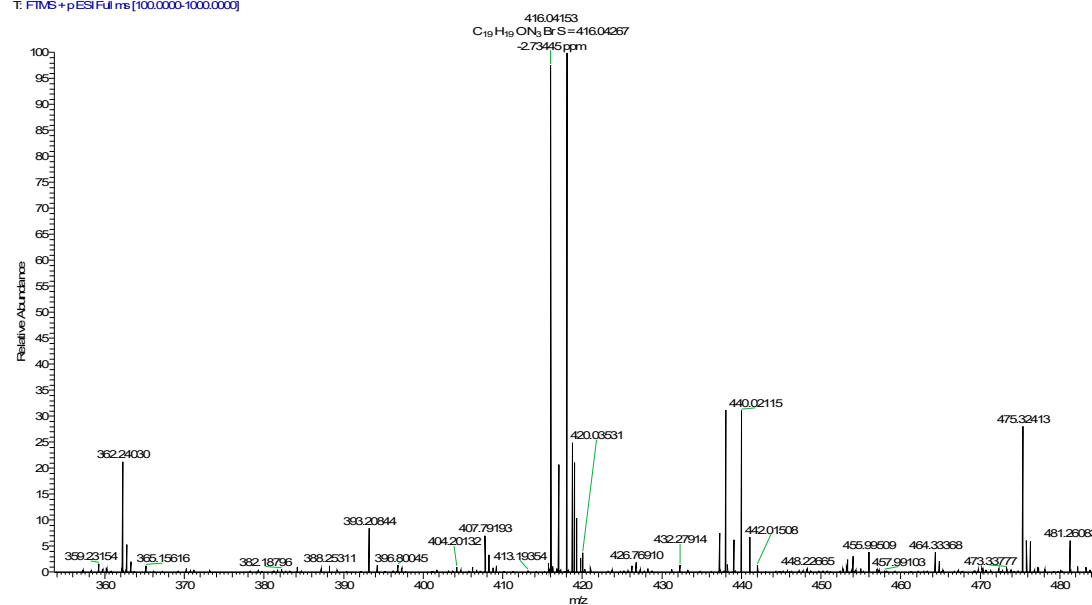

HRMS(ESI) of compound A<sub>32</sub>

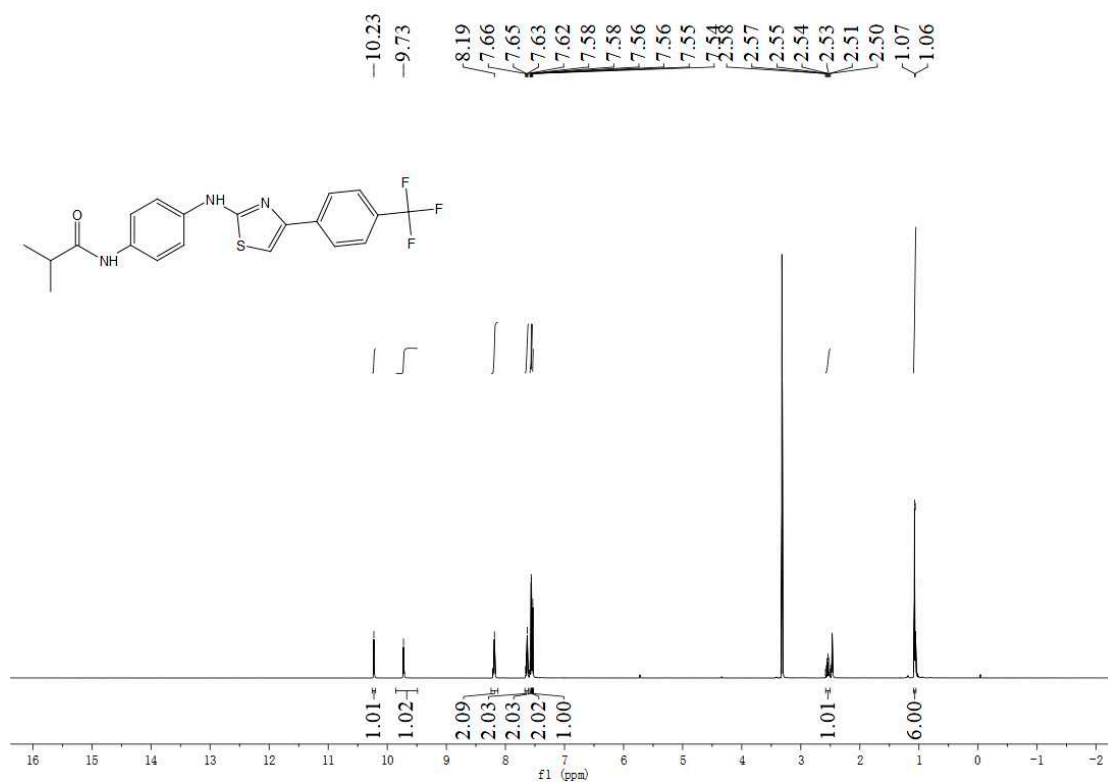<sup>1</sup>H NMR spectrum of compound A<sub>33</sub>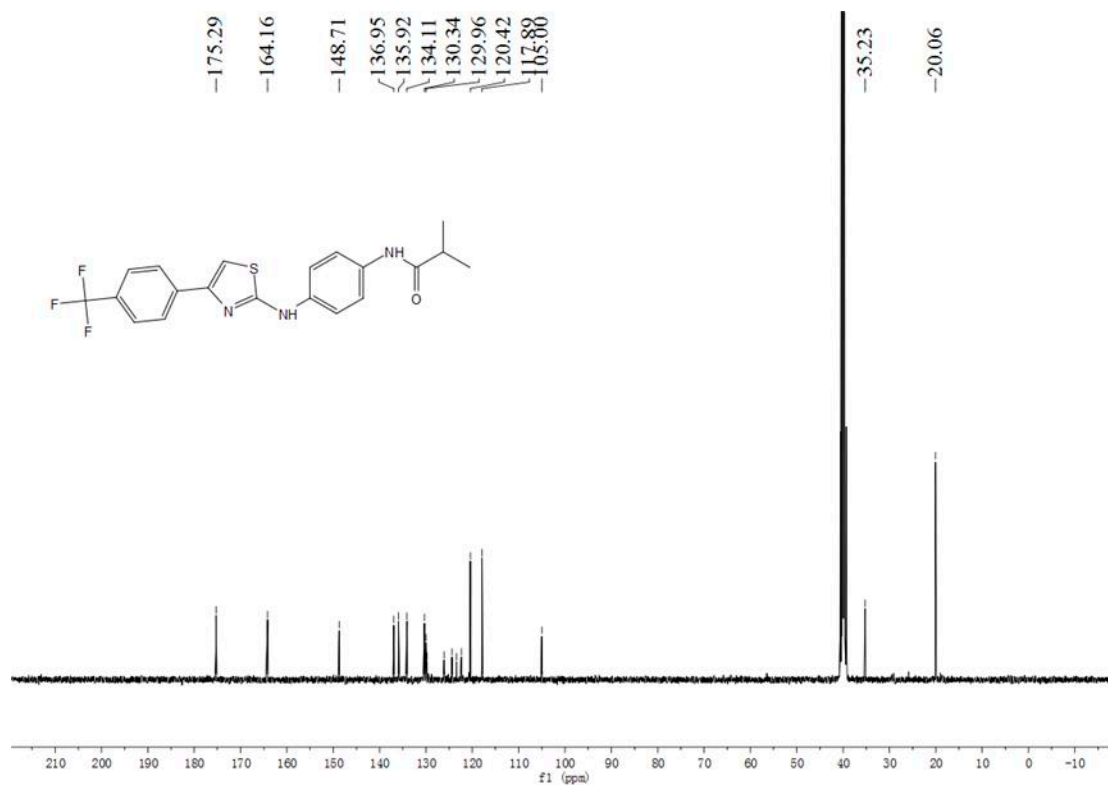<sup>13</sup>C NMR spectrum of compound A<sub>33</sub>



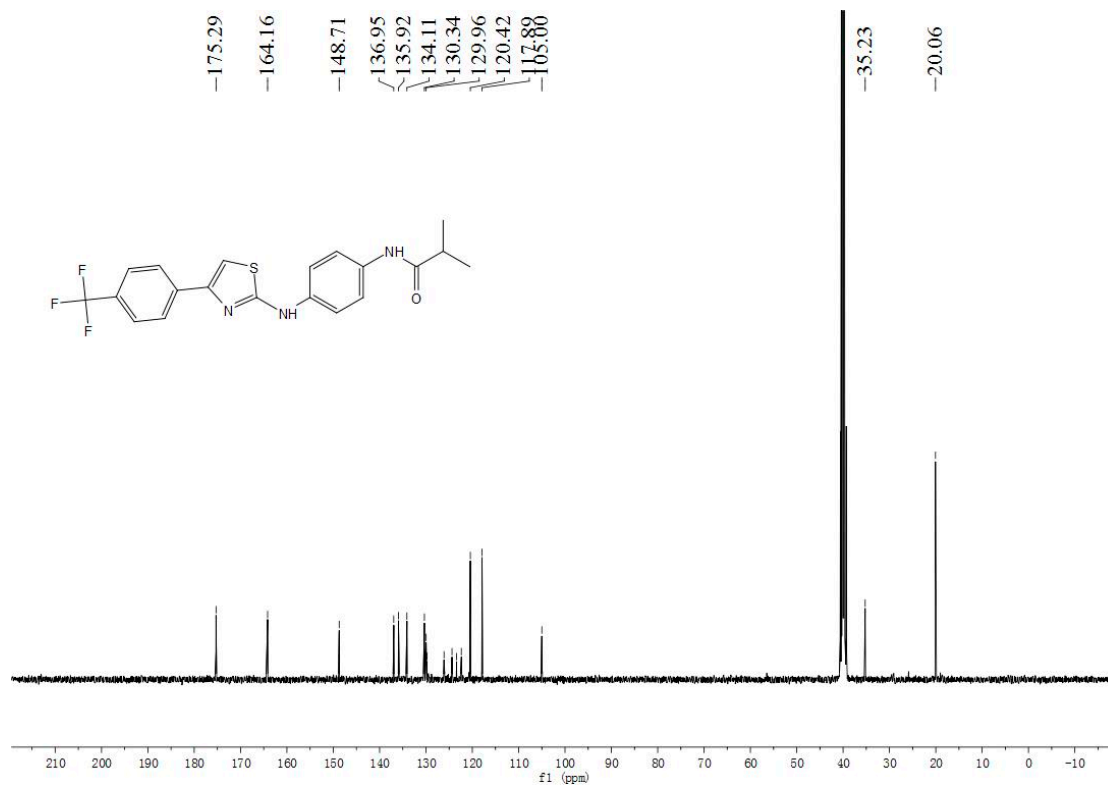<sup>19</sup>F NMR spectrum of compound A<sub>33</sub>

2019091061#51 RT: 0.49 AV: 1 NL: 2:3EB  
T: FIMS+pESI Full ms [100.0000-1000.0000]

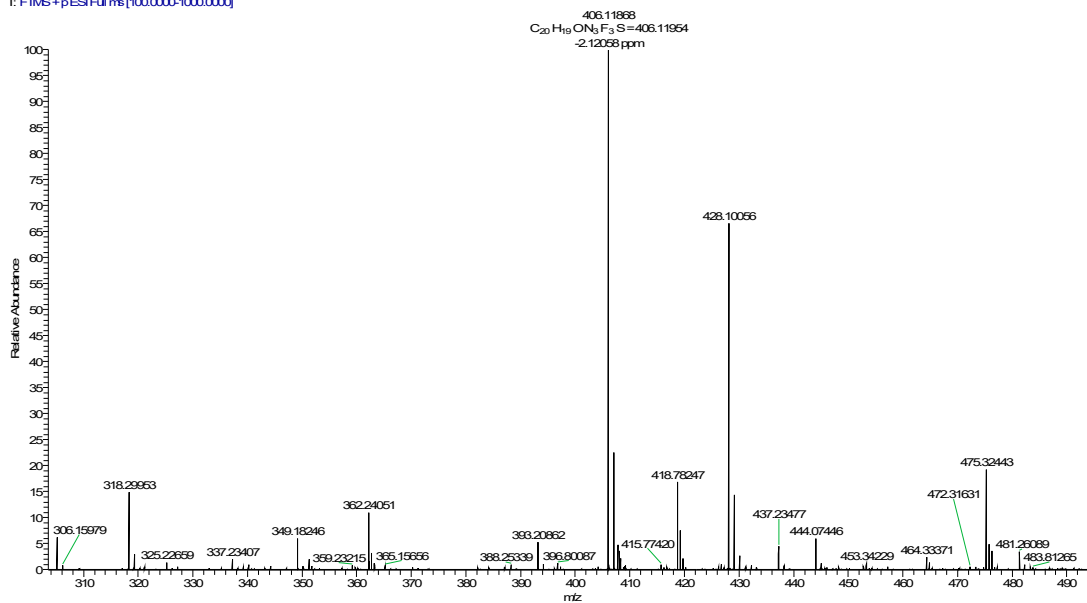HRMS(ESI) of compound A<sub>33</sub>

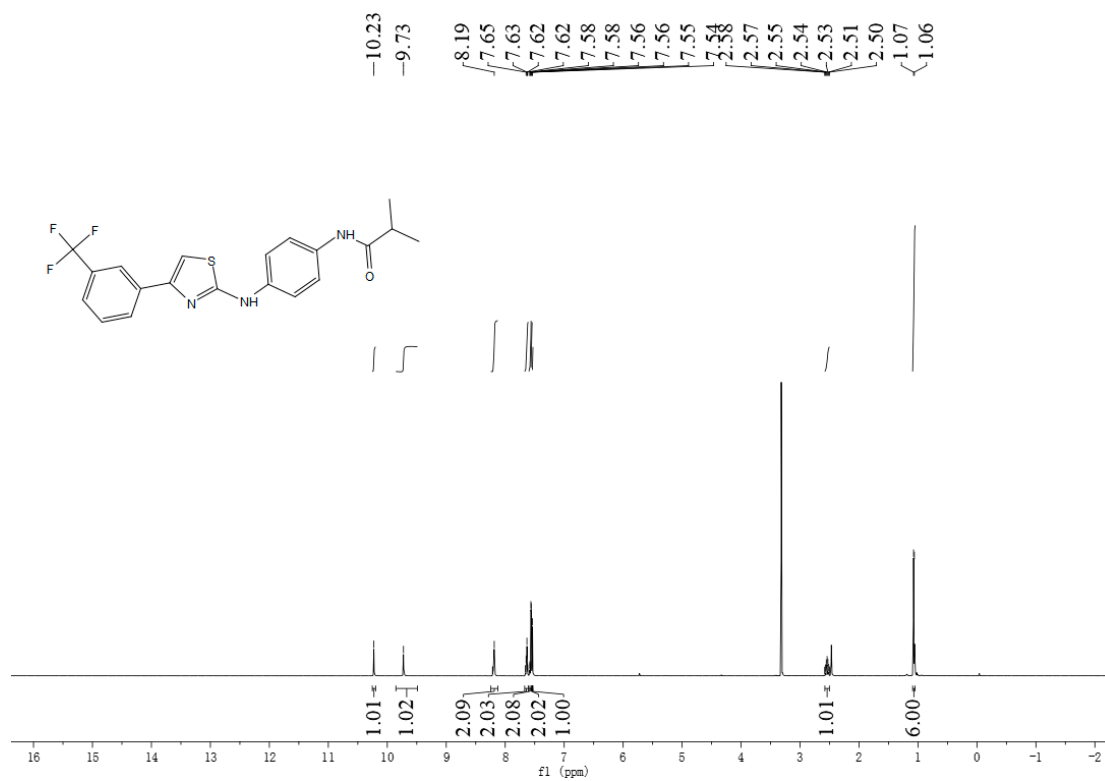**<sup>1</sup>H NMR spectrum of compound A<sub>34</sub>**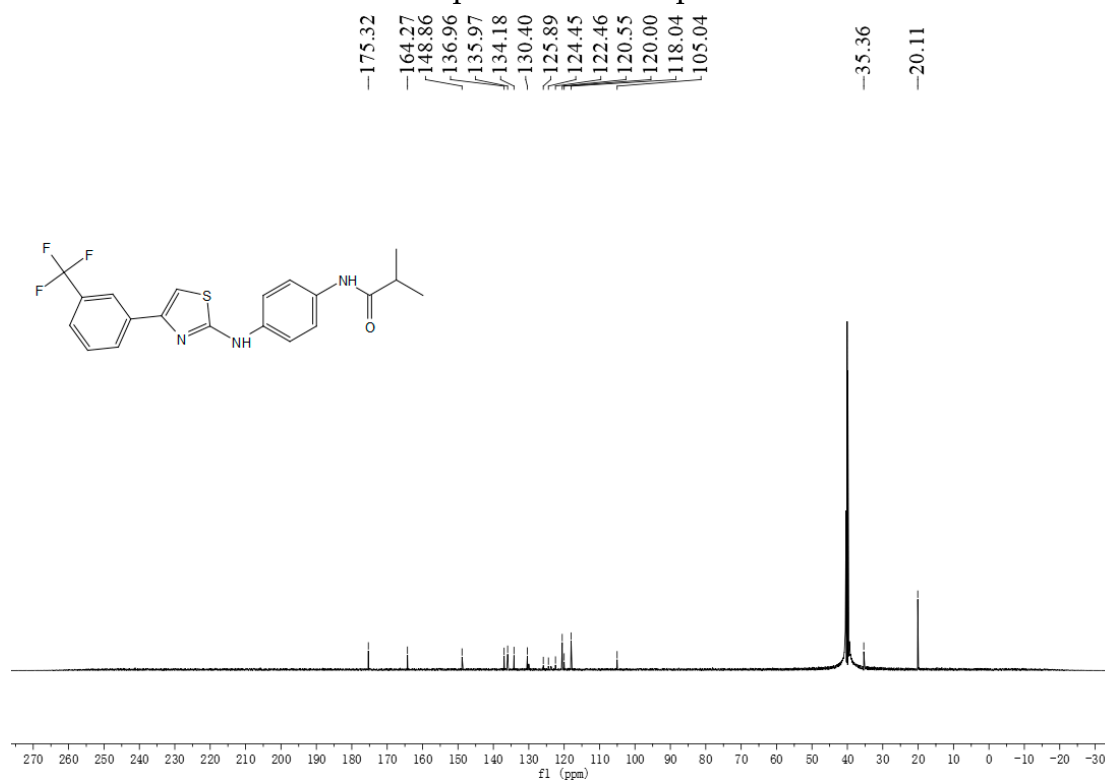**<sup>13</sup>C NMR spectrum of compound A<sub>34</sub>**

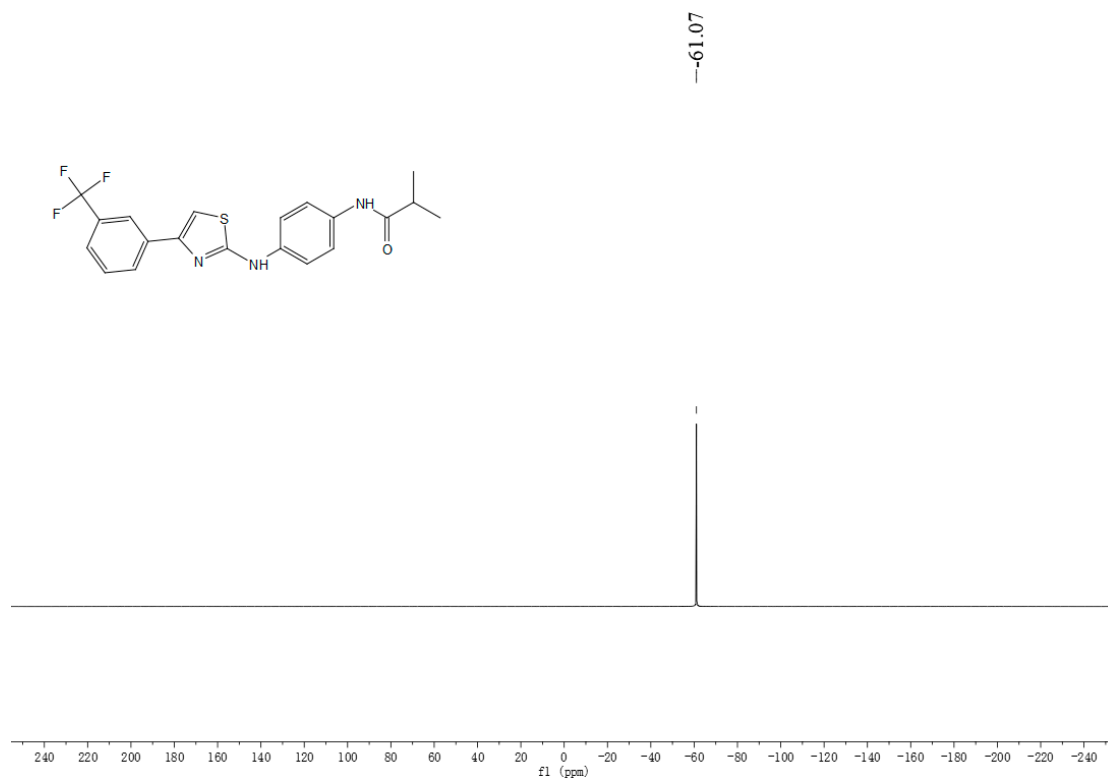

<sup>19</sup>F NMR spectrum of compound A<sub>34</sub>

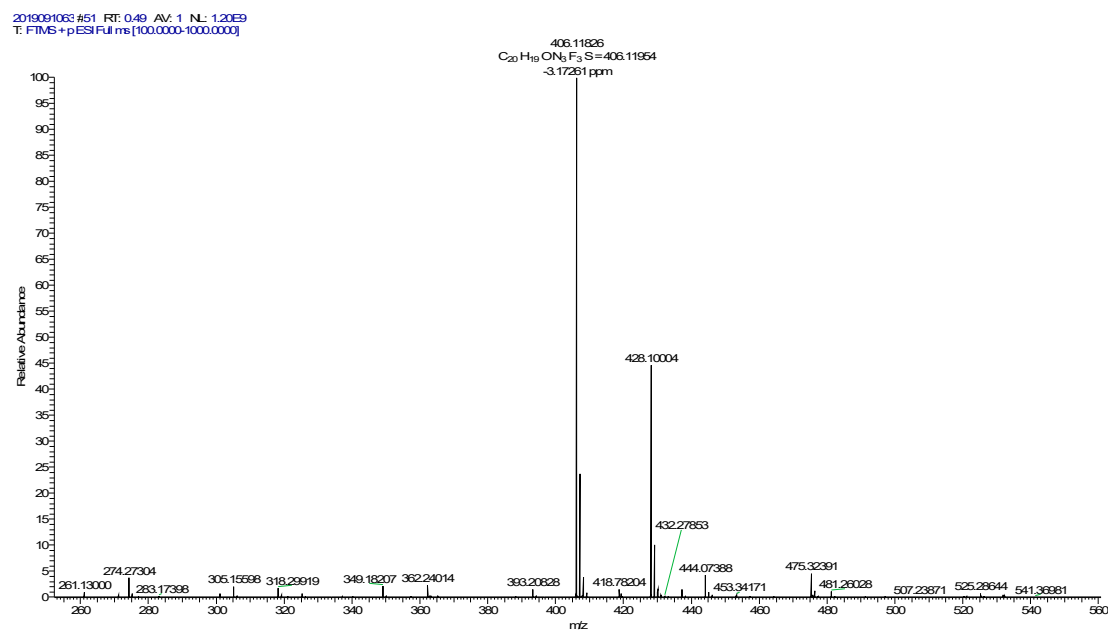

HRMS(ESI) of compound A<sub>34</sub>

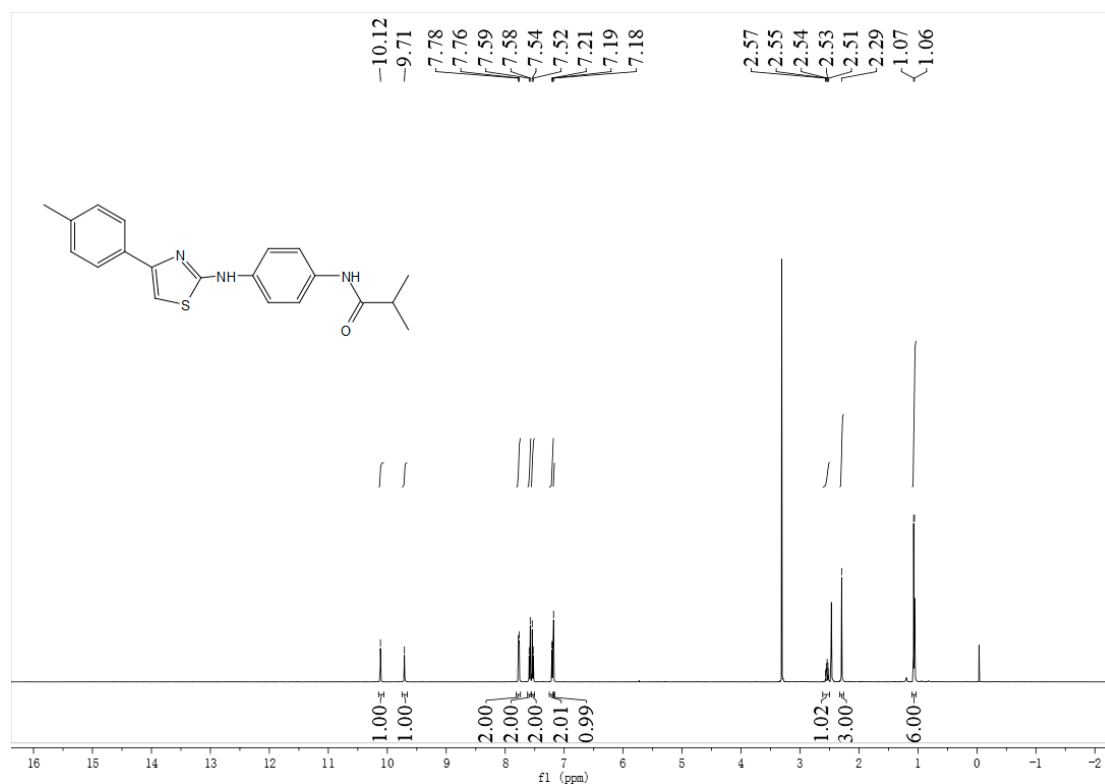<sup>1</sup>H NMR spectrum of compound A<sub>35</sub>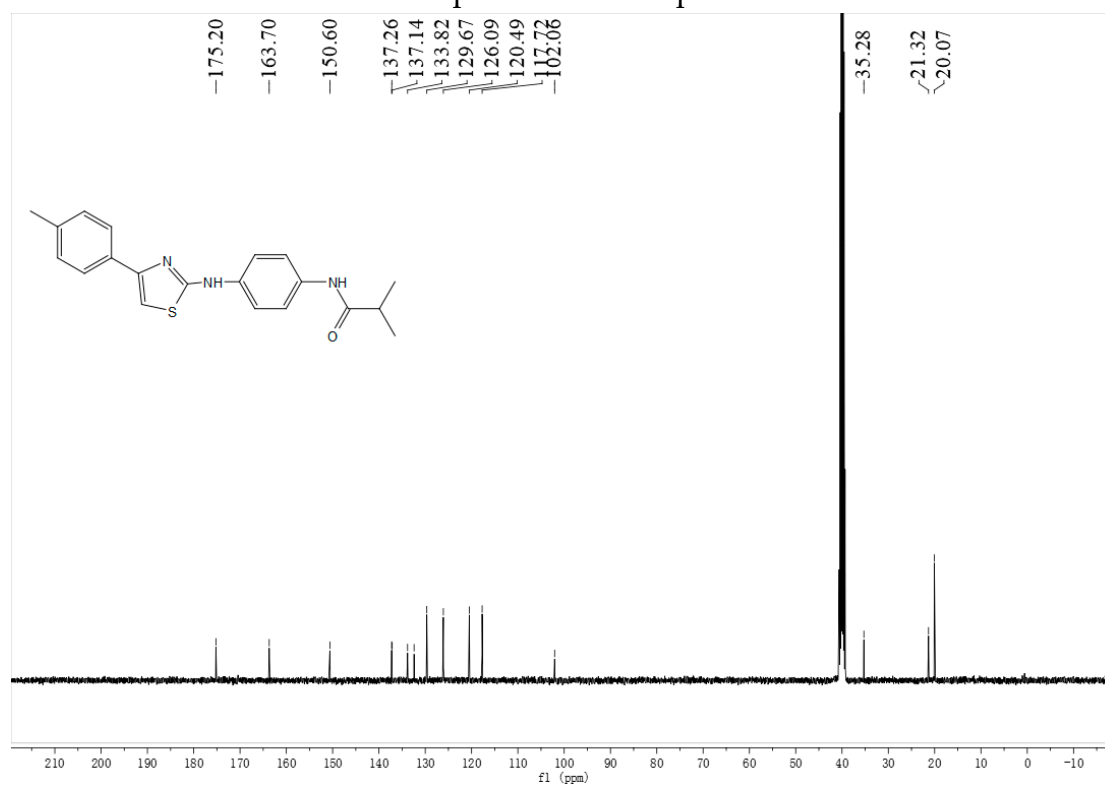<sup>13</sup>C NMR spectrum of compound A<sub>35</sub>

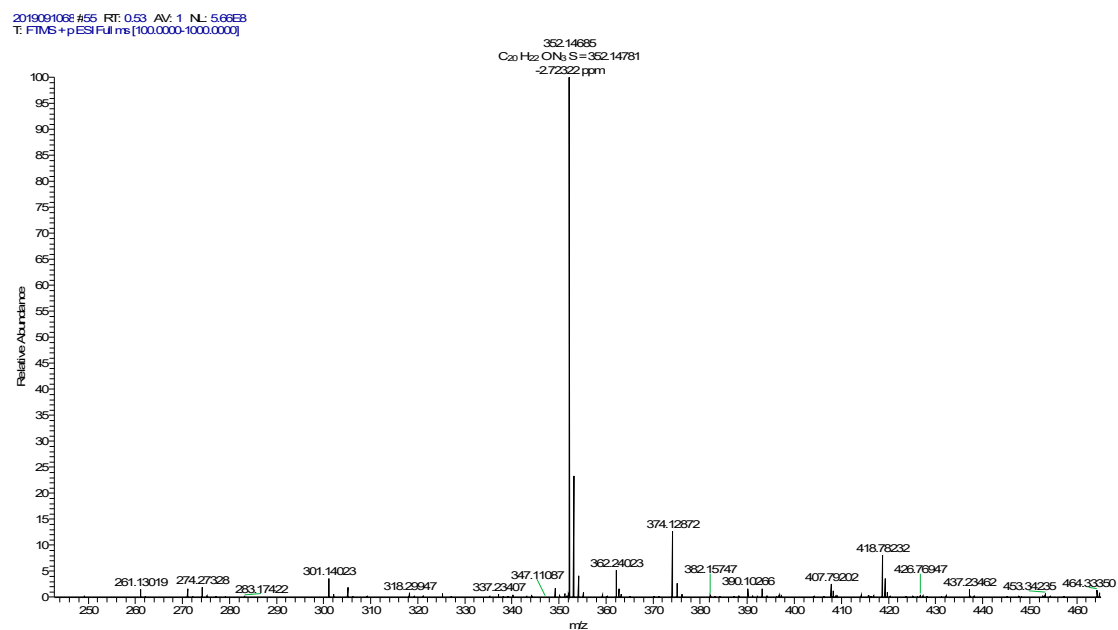HRMS(ESI) of compound A<sub>35</sub>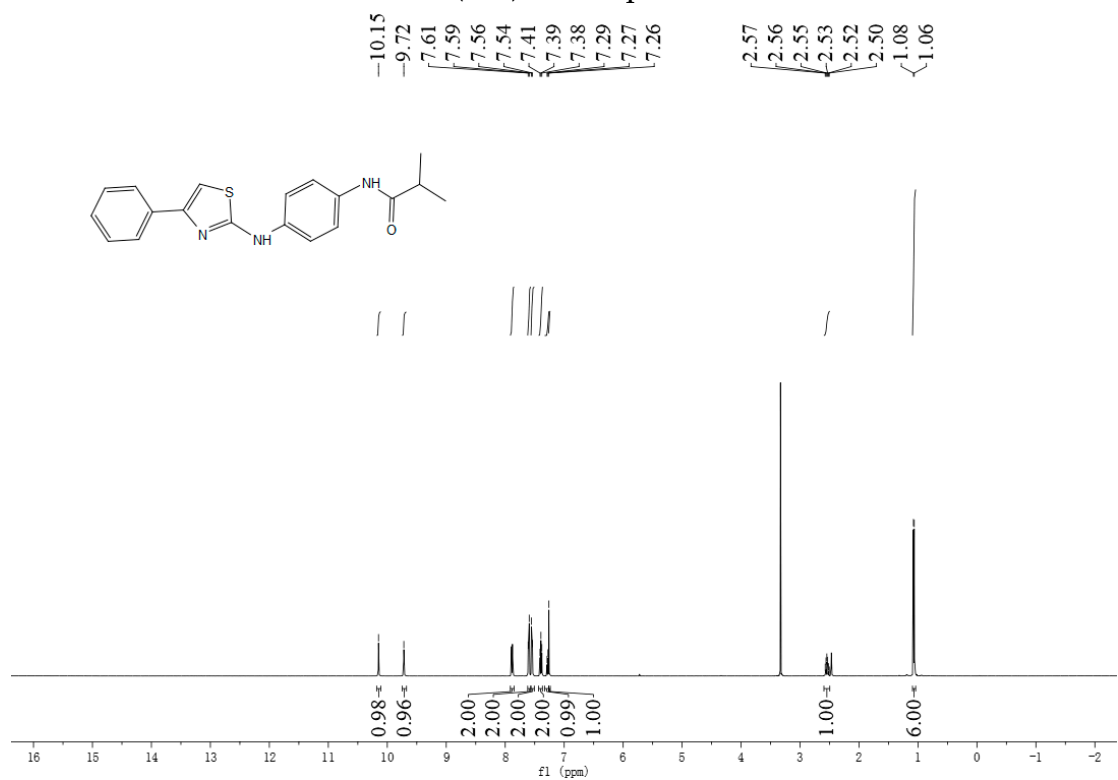<sup>1</sup>H NMR spectrum of compound A<sub>36</sub>

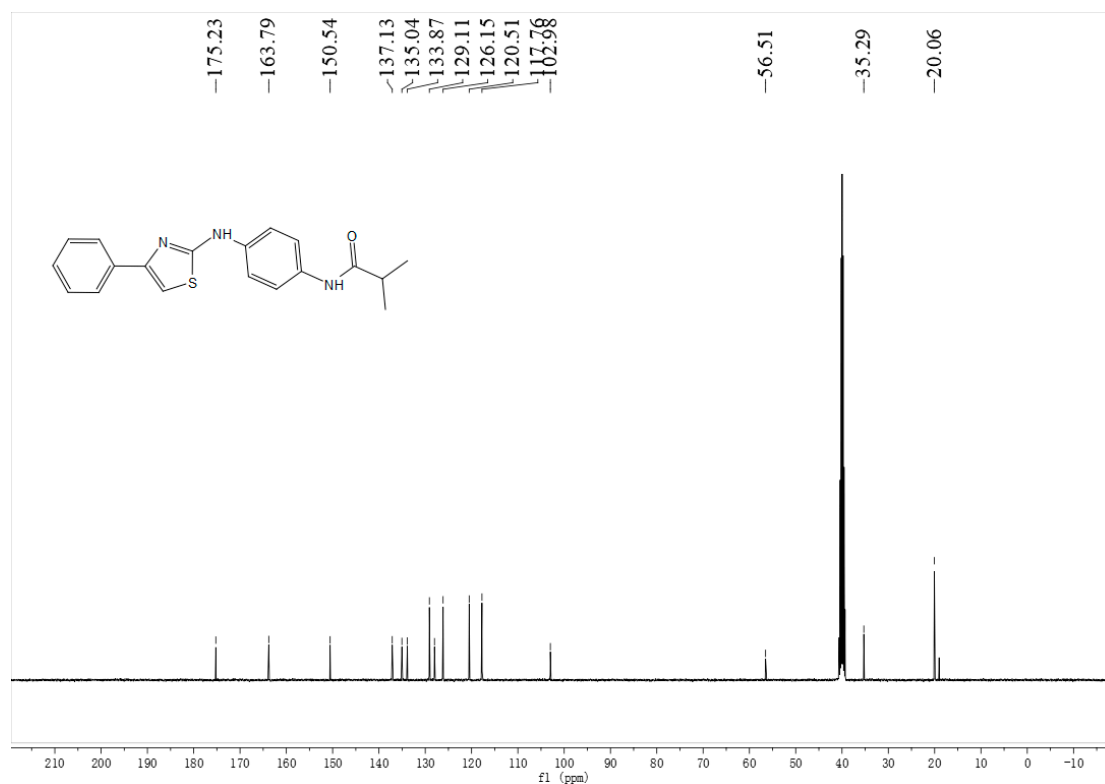

<sup>13</sup>C NMR spectrum of compound A<sub>36</sub>

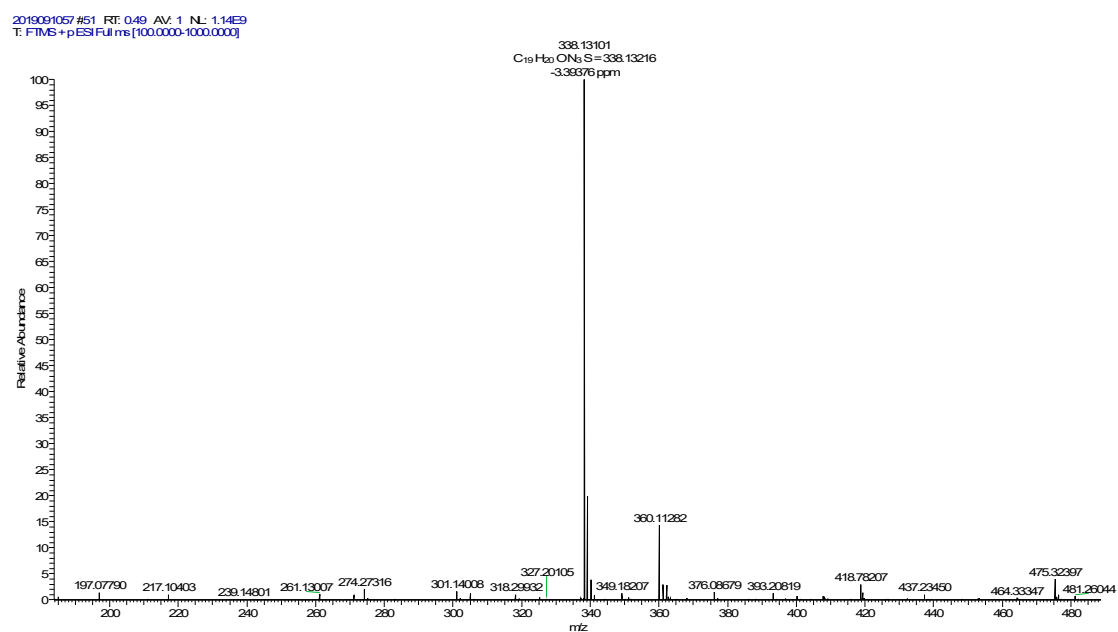

HRMS(ESI) of compound A<sub>36</sub>

**Table S1.** Inhibition rate (%) of compounds **A**<sub>1</sub>–**A**<sub>36</sub> against *Xoo*, *Xac* and *Xoc*.

| Compd.                    | R'/R                                                 | <i>Xoo</i> |           | <i>Xac</i> |           | <i>Xoc</i> |           |
|---------------------------|------------------------------------------------------|------------|-----------|------------|-----------|------------|-----------|
|                           |                                                      | 200 µg/mL  | 100 µg/mL | 200 µg/L   | 100 µg/mL | 200 µg/mL  | 100 µg/mL |
| <b>A</b> <sub>1</sub>     | 4-F/CH <sub>3</sub>                                  | 98±1.67    | 82±0.64   | 78±3.65    | 51±1.83   | 87±2.79    | 55±3.75   |
| <b>A</b> <sub>2</sub>     | 3-F/CH <sub>3</sub>                                  | 25±1.09    | 20±0.82   | 53±1.55    | 26±3.96   | 45±6.80    | 35±1.68   |
| <b>A</b> <sub>3</sub>     | 3,4-diF/CH <sub>3</sub>                              | 76±3.40    | 59±1.72   | 44±5.50    | 21±1.80   | 73±3.64    | 43±1.97   |
| <b>A</b> <sub>4</sub>     | 4-Cl/CH <sub>3</sub>                                 | 85±2.56    | 68±0.78   | 75±4.70    | 45±7.59   | 81±0.94    | 62±2.66   |
| <b>A</b> <sub>5</sub>     | 3-Cl/CH <sub>3</sub>                                 | 47±1.42    | 13±1.56   | 36±0.11    | 16±0.13   | 56±1.25    | 35±1.75   |
| <b>A</b> <sub>6</sub>     | 3,4-diCl/CH <sub>3</sub>                             | 87±2.1     | 67±3.20   | 50±3.10    | 40±1.41   | 69±6.11    | 47±1.48   |
| <b>A</b> <sub>7</sub>     | 4-Br/CH <sub>3</sub>                                 | 52±0.61    | 45±1.70   | 32±1.81    | 21±0.60   | 61±1.73    | 48±2.01   |
| <b>A</b> <sub>8</sub>     | 3-Br/CH <sub>3</sub>                                 | 38±0.159   | 23±0.19   | 31±1.14    | 29±1.25   | 57±2.93    | 30±3.31   |
| <b>A</b> <sub>9</sub>     | 4-CF <sub>3</sub> /CH <sub>3</sub>                   | 52±0.50    | 29±0.91   | 62±1.76    | 35±4.31   | 46±1.74    | 22±1.27   |
| <b>A</b> <sub>10</sub>    | 3-CF <sub>3</sub> /CH <sub>3</sub>                   | 41±1.50    | 22.4±2.30 | 18±0.91    | 16±1.15   | 35±2.93    | 19±3.87   |
| <b>A</b> <sub>11</sub>    | 4-CH <sub>3</sub> /CH <sub>3</sub>                   | 61±5.20    | 52±3.30   | 39±1.10    | 32±1.31   | 37±1.94    | 7±2.30    |
| <b>A</b> <sub>12</sub>    | H/CH <sub>3</sub>                                    | 54±1.40    | 19±2.84   | 40±3.89    | 38±1.62   | 49±1.52    | 28±3.41   |
| <b>A</b> <sub>13</sub>    | 4-F/CH <sub>2</sub> CH <sub>3</sub>                  | 35±1.90    | 24±3.72   | 47±1.90    | 36±6.37   | 61±1.67    | 40±1.91   |
| <b>A</b> <sub>14</sub>    | 3-F/CH <sub>2</sub> CH <sub>3</sub>                  | 41±1.81    | 17±5.95   | 38±2.81    | 27±0.95   | 55±2.16    | 21±2.24   |
| <b>A</b> <sub>15</sub>    | 3,4-diF/CH <sub>2</sub> CH <sub>3</sub>              | 61±1.10    | 37±4.80   | 49±2.20    | 31±4.10   | 52±5.06    | 38±4.73   |
| <b>A</b> <sub>16</sub>    | 4-Cl/CH <sub>2</sub> CH <sub>3</sub>                 | 45±1.93    | 35±2.79   | 39±2.23    | 26±1.76   | 63±1.41    | 43±1.09   |
| <b>A</b> <sub>17</sub>    | 3-Cl/CH <sub>2</sub> CH <sub>3</sub>                 | 24±2.60    | 11±5.80   | 17±2.36    | 14±2.60   | 50±3.07    | 37±2.00   |
| <b>A</b> <sub>18</sub>    | 3,4-diCl/CH <sub>2</sub> CH <sub>3</sub>             | 35±3.10    | 13±1.10   | 52±3.50    | 33±1.30   | 47±1.41    | 10±1.09   |
| <b>A</b> <sub>19</sub>    | 4-Br/CH <sub>2</sub> CH <sub>3</sub>                 | 39±0.70    | 34±1.81   | 67±5.65    | 60±2.59   | 19±5.60    | 4±1.82    |
| <b>A</b> <sub>20</sub>    | 3-Br/CH <sub>2</sub> CH <sub>3</sub>                 | 31±4.70    | 29±3.40   | 25±4.05    | 18±4.74   | 45±3.74    | 17±2.50   |
| <b>A</b> <sub>21</sub>    | 4-CF <sub>3</sub> /CH <sub>2</sub> CH <sub>3</sub>   | 54±0.60    | 23±1.20   | 52±1.47    | 39±3.14   | 45±0.78    | 7±2.17    |
| <b>A</b> <sub>22</sub>    | 3-CF <sub>3</sub> /CH <sub>2</sub> CH <sub>3</sub>   | 26±0.24    | 19±0.28   | 31±4.18    | 25±3.31   | 39±2.40    | 10±0.78   |
| <b>A</b> <sub>23</sub>    | 4-CH <sub>3</sub> /CH <sub>2</sub> CH <sub>3</sub>   | 33±0.73    | 22±0.90   | 49±4.98    | 40±3.96   | 34±4.48    | 16±1.12   |
| <b>A</b> <sub>24</sub>    | H/CH <sub>2</sub> CH <sub>3</sub>                    | 40±2.94    | 29±5.78   | 36±5.80    | 25±3.38   | 55±5.98    | 48±1.18   |
| <b>A</b> <sub>25</sub>    | 4-F/CH(CH <sub>3</sub> ) <sub>2</sub>                | 40±1.35    | 37±0.92   | 28±1.07    | 24±7.31   | 38±4.23    | 26±2.84   |
| <b>A</b> <sub>26</sub>    | 3-F/CH(CH <sub>3</sub> ) <sub>2</sub>                | 14±2.79    | 6±2.0     | 52±3.10    | 31±1.68   | 47±2.58    | 28±5.60   |
| <b>A</b> <sub>27</sub>    | 3,4-diF/CH(CH <sub>3</sub> ) <sub>2</sub>            | 28±1.51    | 13±3.30   | 48±1.38    | 28±4.46   | 60±3.52    | 34±2.73   |
| <b>A</b> <sub>28</sub>    | 4-Cl/CH(CH <sub>3</sub> ) <sub>2</sub>               | 36±4.90    | 23±0.24   | 63±2.25    | 37±2.26   | 58±6.40    | 29±4.84   |
| <b>A</b> <sub>29</sub>    | 3-Cl/CH(CH <sub>3</sub> ) <sub>2</sub>               | 27±4.8     | 17±0.17   | 58±5.38    | 42±3.78   | 46±0.81    | 12±1.27   |
| <b>A</b> <sub>30</sub>    | 3,4-diCl/CH(CH <sub>3</sub> ) <sub>2</sub>           | 56±1.50    | 27±1.13   | 52±5.18    | 45±1.31   | 66±2.39    | 39±5.16   |
| <b>A</b> <sub>31</sub>    | 4-CF <sub>3</sub> /CH(CH <sub>3</sub> ) <sub>2</sub> | 40±4.74    | 37±3.12   | 61±2.85    | 27±3.72   | 23±1.45    | 18±1.06   |
| <b>A</b> <sub>32</sub>    | 3-CF <sub>3</sub> /CH(CH <sub>3</sub> ) <sub>2</sub> | 48±2.57    | 37±3.08   | 49±2.50    | 26±3.07   | 52±2.79    | 31±0.97   |
| <b>A</b> <sub>33</sub>    | 4-Br/CH(CH <sub>3</sub> ) <sub>2</sub>               | 46±2.79    | 28±9.93   | 50±2.49    | 18±3.69   | 46±4.38    | 12±1.27   |
| <b>A</b> <sub>34</sub>    | 3-Br/CH(CH <sub>3</sub> ) <sub>2</sub>               | 39±1.80    | 34±2.56   | 53±4.20    | 43±7.87   | 25±3.42    | 11±1.20   |
| <b>A</b> <sub>35</sub>    | 4-CH <sub>3</sub> /CH(CH <sub>3</sub> ) <sub>2</sub> | 34±1.69    | 30±3.10   | 44±1.68    | 23±7.73   | 33±0.96    | 14±1.27   |
| <b>A</b> <sub>36</sub>    | H/CH(CH <sub>3</sub> ) <sub>2</sub>                  | 40±4.53    | 29±3.81   | 48±1.38    | 28±1.16   | 25±2.80    | 19±4.15   |
| <b>Bismertiazol</b>       |                                                      | 87±1.34    | 67±1.03   | 100±4.84   | 72±5.21   | 95±7.50    | 77±3.29   |
| <b>Thiodiazole copper</b> |                                                      | 76±8.61    | 51±4.31   | 86±3.64    | 59±4.79   | 74±1.72    | 52±5.87   |

**Table S2.** Antibacterial activity of compounds against Xoo, Xac and Xoc.

| Compd.                                 | Xoo                      |                     |                | Xac                      |                     |                | Xoc                      |                     |                |
|----------------------------------------|--------------------------|---------------------|----------------|--------------------------|---------------------|----------------|--------------------------|---------------------|----------------|
|                                        | EC <sub>50</sub> (μg/mL) | regression equation | r <sup>2</sup> | EC <sub>50</sub> (μg/mL) | regression equation | r <sup>2</sup> | EC <sub>50</sub> (μg/mL) | regression equation | r <sup>2</sup> |
| A <sub>1</sub>                         | 51.27±2.41               | y=3.96x-1.78        | 0.98           | 49.72±2.56               | y=5.69x+1.56        | 0.99           | 81.99±2.61               | y=2.81x-0.39        | 0.96           |
| A <sub>3</sub>                         | 90.01±3.12               | y=4.06x-2.95        | 0.98           | 193.78±2.34              | y=2.27x-0.19        | 0.99           | 124.69±3.22              | y=1.74x+1.55        | 0.96           |
| A <sub>4</sub>                         | 61.46±2.12               | y=2.62x+0.32        | 0.97           | 96.21±3.21               | y=3.23x-1.43        | 0.96           | 66.85±2.76               | y=3.45x-1.30        | 0.98           |
| A <sub>6</sub>                         | 53.03±1.22               | y=1.67x+2.13        | 0.98           | 130.92±2.10              | y=2.18x+0.39        | 0.97           | 93.68±4.56               | y=2.49x-0.09        | 0.95           |
| A <sub>11</sub>                        | 164.83±4.34              | y=1.61x+1.43        | 0.98           | 262.44±3.56              | y=1.19x+2.11        | 0.95           | 390.68±5.31              | y=1.57x+0.93        | 0.97           |
| A <sub>13</sub>                        | 184.66±5.21              | y=1.46x+1.67        | 0.99           | 225.27±3.44              | y=1.29x+1.95        | 0.96           | 130.99±2.15              | y=1.80x+1.19        | 0.95           |
| A <sub>25</sub>                        | 326.28±6.76              | y=1.67x+2.13        | 0.96           | 421.17±4.22              | y=1.21x+1.83        | 0.98           | 254.43±3.19              | y=1.64x+2.13        | 0.95           |
| <b>Bismerthiazol</b> <sup>b</sup>      | 61.45±2.10               | y = 2.25x+0.98      | 0.98           | 45.22±1.10               | y = 2.99x+0.05      | 0.95           | 70.97±2.29               | y=2.02x+1.26        | 0.95           |
| <b>Thiodiazole copper</b> <sup>b</sup> | 88.14±2.22               | y = 1.82x+1.46      | 0.95           | 77.04±3.22               | y = 1.83x+1.55      | 0.96           | 98.22±1.78               | y=2.43x+0.16        | 0.97           |

<sup>a</sup> The statistic analysis was conducted by ANOVA method at the condition of equal variances assumed (p > 0.05) and equal variances not assumed (p < 0.05). <sup>b</sup> The commercial antibacterial agents bismerthiazol and thiodiazole-copper were used as positive control.
